# Supplementary material for: Increased absorption in autonomous sensory meridian response
Source: PeerJ. 2020 Feb 17;8:e8588. doi: 10.7717/peerj.8588 (PMC7032055; doi:10.7717/peerj.8588)
Supplement: Supplemental Information 3 [file peerj-08-8588-s003.xlsx]

## Sheet: ASMR vs CONTROLS
Condition: 1 - ASMR; 2 - Control	2. What is your gender?1 - Female 2 - Male 3 - Other	3. What is your age?	4. Do you attend Bath Spa University?1 - Yes 2 - No	5. Having read the description would you say you ever experience ASMR whether it is from watching such videos or in everyday life? Would you classify yourself as somebody who experiences ASMR?1 - Yes 2 - No	6. Do you watch ASMR videos?1 - Yes 2 - No	16. Please select the degree to which you agree with the following statements on a sale of 1 (Disagree Strongly) – 5 (Agree Strongly).	16.1. Sometimes I feel and experience things as I did when I was child.	16.2. I can be greatly moved by eloquent or poetic language.	16.3. While watching a movie, TV show or a play, I may become so involved that I may forget about myself and my surrounding and experience the story as if it were real and as if I were taking part in it.	16.4. If I stare at a picture and then look away from it, I can sometime “see” an image of the picture almost as I were still looking at it.	16.5. Sometimes I feel as if my mind could envelop the whole world.	16.6. I like to watch cloud shapes change in the sky.	16.7. If I wish, I can imagine (or daydream) some things so vividly that they hold my attention as a good movie or story does.	16.8. I think I really know what some people mean when they talk about mystical experiences.	16.9. I sometimes “step outside” my usual self and experience an entirely different state of being.	16.10. Textures – such as wool, sand, wood – sometimes remind me of colours or music.	16.11. Sometimes I experience thing as if they were doubly real.	16.12. When I listen to music I can get so caught up in it that I don’t notice anything else.	16.13. If I wish, I can imagine that my body is so heavy that I could not move it.	16.14. I can often somehow sense the presence of another person before I actually see or hear them.	16.15. The crackle and flames of a wood fire stimulate my imagination.	16.16. It is sometimes possible for me to be completely immersed in nature or in art and to feel as if my whole state of consciousness has somehow been temporarily altered.	16.17. Different colours have distinctive and special meanings for me.	16.18. I am able to wander off into thoughts while doing a routine task and actually forget that I am doing the task, and then find a few minutes later than I have completed it.	16.19. I can sometimes recollect certain past experiences in my life with such clarity and vividness that is like living them again or almost so.	16.20. Things that might seem meaningless to others often make sense to me.	16.21. While acting a play I think I could really feel the emotions of the character and “become” her/him for the time being, forgetting both myself and the audience.	16.22. My thoughts often don’t occur as words but as visual images.	16.23. I often take delight in small things (such as the colours in soap bubbles).	16.24. When listening to organ music or other powerful music I sometimes feel as if I am being lifted into the air.	16.25. Sometimes I can change noise into music by the way I listen to it.	16.26. Some of my most vivid memories are called up by scents and smells.	16.27. Some music reminds me of pictures or changing colour patterns.	16.28. I often know what someone is going to say before he or she say it.	16.29. I often have “physical memories”, for example, after I have been swimming I may still feel as if I am in the water.	16.30. The sound of a voice can be so fascinating to me that I can just go on listening to it.	16.31. At times I somehow feel the presence of someone who is not physically there.	16.32. Sometimes thoughts and images come to me without the slightest effort on my part.	16.33. I find that different odours have different colours.	16.34. I can be deeply moved by a sunset.	TAS	17. Below is a collection of statements about your everyday experience. Using the 1 (Almost Always) – 6 (Almost Never) scale below, please indicate how frequently or infrequently you currently have each experience. Please answer according to what really reflects your experience rather than what you think your experience should be. Please treat each item separately from every other item.	17.1. I could be experiencing some emotion and not be conscious of it until sometime later.	17.2. I break or spill things because of carelessness, not paying attention, or thinking of something else.	17.3. I find it difficult to stay focused on what’s happening in the present.	17.4. I tend to walk quickly to get where I’m going without paying attention to what I experience along the way.	17.5. I tend not to notice feelings of physical tension or discomfort until they really grab my attention.	17.6. I forget a person’s name almost as soon as I’ve been told it for the first time.	17.7. It seems I am “running on automatic,” without much awareness of what I’m doing.
1	3	19	1	1	1		3	5	5	4	4	5	5	5	5	5	5	5	3	5	4	5	5	5	4	4	5	5	5	5	4	5	5	3	3	4	5	4	5	5	154		2	4	2	3	3	2	1
1	2	20	2	1	2		4	5	5	4	2	3	5	3	2	1	4	5	1	2	4	5	2	2	2	4	3	3	5	4	5	3	3	2	4	5	2	4	3	5	116		2	3	3	2	4	1	1
1	2	21	2	1	1		5	4	3	4	1	5	4	1	2	1	3	4	1	3	4	4	3	2	4	1	5	2	2	4	3	4	1	2	4	5	1	4	1	4	101		5	2	3	6	1	1	3
1	2	22	2	1	1		4	3	4	2	2	5	3	2	2	3	4	3	3	2	4	3	3	4	4	5	3	4	4	4	5	5	3	3	3	4	2	4	4	4	117		3	2	4	3	2	1	3
1	2	22	2	1	1		2	5	1	2	1	5	5	5	1	2	1	3	4	1	5	4	5	1	1	2	1	5	4	2	1	5	5	1	1	5	1	5	3	1	96		6	4	6	3	1	6	5
1	2	22	2	1	1		3	5	1	2	5	3	4	4	4	1	1	3	2	2	5	5	2	3	4	4	2	3	4	2	2	4	4	2	2	5	2	5	3	4	107		4	3	2	4	1	2	4
1	2	23	1	1	2		3	5	1	1	1	3	4	3	3	4	3	5	4	4	4	4	5	3	4	3	4	3	3	4	4	4	4	3	3	4	2	3	3	5	116		1	5	6	4	3	6	6
1	2	23	2	1	1		5	4	2	4	5	1	5	5	5	5	5	4	4	5	5	4	1	5	5	4	5	5	5	5	5	5	3	5	1	5	2	5	1	1	136		6	6	6	1	1	1	6
1	2	25	2	1	1		3	4	2	2	1	2	4	2	2	1	2	3	2	4	2	1	2	4	1	4	1	2	2	2	2	5	2	3	3	2	1	3	1	2	79		2	4	2	1	3	2	2
1	3	26	2	1	1		3	5	5	5	4	5	4	4	5	4	4	3	3	4	4	4	4	4	3	3	4	4	5	3	4	5	4	5	5	4	4	4	5	5	141		4	2	3	5	4	4	3
1	2	35	2	1	1		5	5	5	5	3	4	5	4	4	4	4	4	2	3	3	5	5	5	5	4	4	4	4	4	2	5	3	3	3	5	3	5	4	5	138		1	2	3	4	5	2	5
1	1	18	2	1	1		2	4	5	2	3	2	5	2	1	1	1	2	1	2	1	1	1	2	2	4	1	1	3	1	2	1	1	3	2	1	1	1	1	4	67		5	2	5	5	6	5	5
1	1	18	2	1	1		4	4	3	4	3	3	3	4	4	2	4	3	3	3	3	3	2	4	4	4	2	2	3	3	4	3	2	3	2	4	3	3	2	3	106		5	2	2	5	6	6	5
1	1	18	1	1	1		2	2	3	5	2	4	5	3	3	4	5	5	1	5	5	1	3	5	5	5	1	3	3	3	3	3	4	5	5	5	5	4	4	5	126		5	5	4	5	5	4	5
1	1	18	1	1	1		4	4	2	4	2	3	3	4	3	4	3	4	3	4	3	4	3	3	3	3	3	2	4	4	2	4	4	3	3	3	3	3	3	4	111		3	5	5	3	6	2	6
1	1	18	1	1	1		2	2	5	4	4	4	4	4	2	2	2	4	3	2	4	3	3	2	2	2	2	2	2	2	2	2	2	2	2	2	2	3	4	4	93		2	2	3	3	3	4	4
1	1	18	1	1	2		2	5	4	2	4	4	5	4	1	4	3	4	1	4	4	4	4	3	4	4	2	3	4	4	2	4	4	3	1	2	3	4	1	5	112		4	5	2	2	1	1	2
1	1	18	2	1	2		3	5	5	4	3	5	5	1	2	2	4	5	5	5	5	5	3	5	5	5	5	5	5	5	5	2	4	4	3	4	5	5	2	5	141		6	2	2	4	6	2	2
1	1	19	2	1	1		5	5	5	5	5	2	2	1	4	1	1	5	2	5	5	5	5	5	2	5	5	5	5	5	5	5	5	5	5	5	5	5	5	5	145		6	6	1	1	1	3	1
1	1	19	1	1	1		2	4	4	1	1	3	3	1	1	2	1	2	1	4	4	1	2	2	3	4	2	2	3	4	5	2	2	3	3	5	3	2	1	3	86		3	1	4	3	1	6	3
1	1	19	1	1	1		3	4	4	3	2	4	4	4	4	2	4	3	4	4	4	3	2	4	4	4	4	3	2	1	2	3	2	2	2	2	2	4	2	4	105		1	4	2	5	6	5	6
1	1	19	1	1	1		5	5	5	4	4	5	5	5	5	5	3	4	4	3	5	3	4	5	4	5	1	4	5	1	5	4	4	1	5	5	1	3	4	5	136		4	4	4	2	3	4	5
1	1	19	1	1	1		4	2	4	4	3	5	4	4	4	2	4	5	1	5	4	4	5	4	5	4	4	4	5	2	2	3	2	4	4	4	5	4	5	3	128		4	3	2	2	5	2	3
1	1	19	1	1	1		3	3	2	4	3	4	3	4	4	3	3	5	3	1	4	4	4	4	4	3	3	3	4	4	4	4	4	3	4	4	2	3	3	4	117		2	2	2	2	3	2	3
1	1	19	1	1	1		1	4	4	1	1	4	3	1	4	1	1	4	1	4	4	1	1	4	4	4	1	4	4	1	1	1	4	1	4	4	4	1	1	4	87		1	1	1	1	1	5	5
1	1	20	1	1	1		3	4	5	4	4	4	4	4	3	4	2	2	3	5	5	5	3	5	5	5	3	4	5	4	2	5	3	4	2	5	5	4	1	5	131		4	5	5	3	5	3	4
1	1	20	1	1	1		2	4	5	4	1	3	4	3	2	1	1	5	2	4	3	2	4	4	3	2	5	2	4	2	2	3	4	3	4	5	4	4	4	3	108		3	2	4	3	6	4	5
1	1	20	2	1	1		3	1	5	4	2	4	4	2	4	1	1	4	2	4	1	2	1	5	2	5	4	1	5	1	2	2	2	3	1	1	1	1	1	4	86		3	2	1	1	2	2	1
1	1	20	2	1	1		3	4	3	5	4	5	5	3	4	3	4	4	4	3	5	5	5	5	5	4	4	5	5	3	3	5	5	3	5	3	3	4	5	4	140		1	4	3	1	4	1	3
1	1	20	1	1	1		4	5	4	3	2	4	4	3	2	2	3	4	4	5	4	4	4	5	4	4	4	2	4	3	2	4	4	3	2	4	3	5	2	4	120		3	3	2	4	3	2	5
1	1	20	2	1	1		3	5	5	4	5	5	5	3	2	2	4	5	3	5	5	3	2	5	4	5	5	4	5	5	5	2	2	5	5	5	2	5	2	5	137		1	1	1	3	4	1	4
1	1	20	2	1	1		3	1	5	4	3	5	5	3	4	2	1	5	5	3	4	4	3	5	4	4	4	5	5	3	2	4	4	4	2	3	4	4	2	5	124		2	5	4	6	5	6	5
1	1	20	2	1	2		5	4	5	5	3	4	5	2	1	5	4	3	5	4	5	5	5	5	4	3	3	5	5	3	3	5	4	3	5	4	3	5	5	5	140		3	3	4	3	2	2	3
1	1	20	2	1	2		4	5	3	4	3	4	3	3	2	3	1	5	3	2	4	4	4	3	2	4	4	2	4	3	4	3	3	2	5	4	2	4	2	4	112		2	3	3	3	5	2	5
1	1	20	2	1	2		3	5	1	1	4	5	3	1	4	1	1	4	1	5	5	2	3	5	5	5	1	1	4	1	1	2	4	3	1	4	1	4	4	5	100		5	1	4	6	5	6	6
1	2	20	2	1	2		4	5	5	4	2	3	5	3	2	1	4	5	1	2	4	5	2	2	2	4	3	3	5	4	5	3	3	2	4	5	2	4	3	5	116		2	3	3	2	4	1	1
1	1	21	2	1	1		3	5	5	2	2	2	2	3	1	1	1	1	1	2	2	3	2	3	3	5	5	5	4	2	3	2	2	3	4	5	4	5	1	3	97		5	6	3	3	1	5	3
1	1	21	2	1	1		4	3	4	2	3	3	5	4	3	1	3	4	2	4	4	2	5	5	4	4	1	5	3	2	2	3	5	4	1	3	2	3	2	2	107		2	6	5	2	4	2	2
1	1	21	2	1	1		5	4	5	5	4	3	4	4	3	1	4	5	5	3	3	5	4	4	4	4	3	4	3	3	3	5	4	4	3	3	4	3	5	4	130		3	3	5	4	3	6	3
1	1	21	2	1	1		3	2	2	1	2	5	5	2	1	3	3	5	1	2	4	5	4	5	2	3	3	4	4	5	1	3	1	3	2	4	1	5	4	4	104		4	1	4	4	2	3	1
1	1	21	1	1	1		3	4	5	4	2	4	3	2	4	1	1	2	1	2	2	3	3	3	4	4	3	1	4	1	1	2	1	1	3	1	2	2	1	3	83		4	4	4	3	4	4	4
1	1	21	2	1	2		5	2	3	5	1	1	1	3	2	1	2	4	4	5	2	2	3	3	4	2	5	2	2	2	2	2	3	2	3	3	3	2	2	3	91		3	4	4	6	4	2	3
1	1	21	1	1	2		3	1	5	2	1	3	5	1	1	1	1	3	1	3	2	1	1	4	3	3	3	1	3	1	1	4	1	4	1	2	1	1	1	4	73		4	1	6	2	5	6	4
1	1	22	2	1	1		5	4	4	3	3	4	5	2	3	5	4	5	5	3	4	3	5	5	5	4	5	4	4	4	5	5	5	2	3	5	3	4	5	4	139		4	6	3	5	6	3	4
1	1	22	2	1	1		5	5	3	5	5	5	5	4	4	2	5	2	5	2	4	5	2	4	3	5	4	3	5	4	3	5	4	3	4	4	3	4	1	5	132		4	2	3	5	4	2	4
1	1	22	2	1	1		5	5	5	5	4	4	5	5	4	2	4	4	4	5	4	4	3	4	4	5	3	5	5	3	5	5	3	5	4	5	2	5	2	5	142		4	3	2	5	5	4	5
1	1	23	2	1	1		4	4	5	4	5	4	5	5	5	5	4	5	3	4	3	3	5	5	5	4	4	5	5	4	5	5	5	4	4	4	5	4	5	5	151		3	2	2	2	3	1	2
1	1	23	2	1	1		5	3	4	4	4	3	5	4	5	2	4	5	4	2	3	4	4	4	5	5	5	4	5	5	4	3	2	5	3	5	2	5	2	3	132		2	1	3	1	1	1	1
1	1	24	2	1	1		4	5	5	4	5	4	5	4	5	1	5	5	1	2	5	5	5	5	1	5	5	4	5	5	1	3	5	5	3	5	4	5	3	5	139		6	1	2	5	6	2	6
1	1	24	2	1	1		5	2	4	2	4	4	3	3	2	1	2	2	2	4	3	2	4	5	4	2	5	2	5	5	3	4	1	4	4	4	1	3	1	5	107		5	5	2	1	6	1	3
1	1	28	2	1	1		5	3	4	5	3	5	5	3	4	4	3	3	3	4	2	2	4	4	5	5	4	5	5	2	3	5	2	3	4	4	5	3	2	2	125		4	1	2	3	2	3	2
1	1	29	2	1	1		4	5	4	3	2	4	4	4	2	1	2	4	1	2	3	4	1	5	3	4	4	3	3	2	1	4	3	3	4	4	1	3	1	4	102		2	5	2	2	1	5	2
1	1	34	2	1	1		3	4	5	3	2	3	4	3	3	3	4	5	2	3	5	5	4	4	5	4	4	3	4	5	3	4	4	2	2	4	2	4	3	4	122		4	2	2	3	5	2	3
1	2	25	2	1	2		3	4	2	3	5	2	3	5	4	1	5	5	4	2	1	5	3	3	2	4	5	4	3	5	3	2	5	3	3	2	1	4	2	3	111		6	5	6	3	5	2	6
1	2	26	2	1	2		3	4	5	4	5	4	5	4	3	5	3	5	3	4	5	5	5	5	5	4	5	3	4	5	5	5	5	3	3	5	4	5	5	4	147		4	2	4	3	1	2	5
1	1	18	1	1	2		2	5	4	2	4	4	5	4	1	4	3	4	1	4	4	4	4	3	4	4	2	3	4	4	2	4	4	3	1	2	3	4	1	5	112		4	5	2	2	1	1	2
1	1	18	2	1	2		3	5	5	4	3	5	5	1	2	2	4	5	5	5	5	5	3	5	5	5	5	5	5	5	5	2	4	4	3	4	5	5	2	5	141		6	2	2	4	6	2	2
1	1	23	2	1	1		4	4	3	1	1	2	5	1	5	1	2	5	1	4	5	1	3	4	3	2	3	1	1	1	1	5	1	4	1	1	4	5	1	5	91		1	6	1	6	1	3	1
1	1	23	2	1	1		3	3	5	2	4	3	5	3	1	1	3	5	1	3	3	3	3	4	5	3	4	3	5	1	3	2	1	1	1	5	2	3	1	5	100		3	3	4	5	2	2	3
1	2	27	2	1	1		3	5	4	4	5	2	5	2	1	3	2	2	5	4	5	4	1	5	4	5	5	4	5	4	5	2	4	2	1	4	1	5	2	3	118		1	3	1	2	2	3	6
1	2	28	2	1	2		5	5	5	5	4	5	5	5	5	1	4	5	5	5	5	5	5	5	5	5	5	5	5	5	5	5	5	5	5	5	5	5	3	5	162		5	4	1	1	2	1	6
1	1	23	2	1	1		2	1	3	3	3	5	3	1	1	3	1	4	3	1	4	5	5	4	1	2	1	3	5	5	1	4	5	1	1	5	1	4	4	4	99		2	6	2	5	3	2	1
1	1	23	2	1	1		5	2	5	2	1	2	4	4	1	2	4	5	2	4	5	5	5	4	3	3	2	2	4	3	2	4	5	2	1	4	5	4	1	3	110		3	2	5	4	5	1	3
1	2	19	2	1	1		4	4	4	5	4	3	4	4	3	4	3	3	3	5	2	3	4	4	4	4	4	2	5	3	4	5	5	5	5	5	5	5	5	2	134		5	4	4	5	2	2	3
1	2	20	1	1	2		1	2	3	4	5	1	2	3	4	2	3	4	5	3	4	5	2	3	4	5	2	3	4	5	4	3	2	1	3	4	4	3	2	1	106		4	3	4	5	4	3	4
1	2	20	1	1	1		3	3	4	2	1	2	4	1	2	1	3	2	1	1	4	1	1	1	2	2	2	4	2	3	1	3	2	3	1	3	1	4	1	3	74		6	3	3	2	5	5	3
1	2	21	2	1	1		3	4	2	5	2	4	1	1	1	4	5	4	1	3	1	4	4	4	5	5	1	5	5	1	4	5	5	3	5	5	4	3	5	2	116		6	1	1	5	5	6	3
1	2	21	1	1	1		2	3	3	4	3	4	4	3	2	1	2	3	3	4	3	2	3	2	3	2	3	3	3	5	4	3	2	2	2	2	3	3	3	4	98		2	3	3	2	3	4	4
1	2	21	2	1	2		5	4	5	5	3	1	5	5	5	4	2	5	1	3	2	5	3	1	3	4	3	5	2	3	3	3	4	4	5	1	2	5	5	4	120		3	2	2	4	5	5	3
1	2	22	2	1	1		4	1	3	1	5	4	5	4	1	1	4	2	1	1	1	1	1	1	5	5	1	5	1	4	1	1	1	1	1	1	4	1	1	1	75		1	5	6	6	5	5	5
1	2	24	2	1	1		1	1	5	1	4	4	5	1	3	1	4	4	1	4	2	2	2	5	5	3	1	3	1	1	2	1	4	4	1	5	1	4	1	4	91		2	5	1	1	4	3	1
1	2	28	2	1	1		2	3	1	4	1	1	3	1	1	1	1	4	3	5	1	3	2	4	1	2	1	1	4	1	1	3	1	2	1	4	1	1	1	2	68		3	5	5	3	5	3	2
1	2	37	2	1	1		2	3	2	4	3	2	2	1	1	3	2	2	3	4	4	3	2	3	3	4	1	4	4	1	2	5	2	3	2	2	1	3	3	4	90		3	1	2	4	4	3	3
1	1	18	2	1	1		3	1	1	1	2	1	2	1	1	1	1	3	1	2	1	1	2	2	1	4	1	3	2	1	1	3	1	3	1	1	1	1	1	2	54		6	2	5	1	5	1	1
1	1	18	2	1	1		4	5	5	2	3	1	5	1	1	1	1	1	2	1	2	1	1	5	3	3	4	3	3	1	1	4	1	1	1	1	1	4	1	1	75		3	6	5	6	1	4	4
1	1	18	1	1	1		5	2	5	1	4	3	5	3	4	1	5	4	1	3	1	1	1	5	5	5	1	5	5	3	5	5	1	5	2	5	4	4	2	4	115		6	5	3	4	6	2	6
1	1	19	2	1	1		4	2	5	5	4	3	5	1	4	3	1	5	1	4	5	5	4	5	3	4	1	3	5	4	4	5	5	3	4	3	2	4	3	5	124		3	3	2	3	5	2	2
1	1	19	1	1	1		4	4	5	5	2	3	5	4	3	3	3	5	3	3	5	3	3	5	5	3	4	3	5	3	5	5	2	4	5	5	3	5	2	3	130		3	3	2	3	2	6	3
1	1	19	1	1	1		3	3	4	3	4	5	4	2	3	3	2	4	3	4	5	4	3	4	2	3	4	4	4	3	2	5	2	4	4	5	4	4	3	5	121		3	1	2	2	3	2	4
1	1	19	1	1	1		4	4	4	4	2	4	4	3	2	1	4	3	4	3	4	4	1	2	4	4	2	4	5	3	3	4	2	4	4	2	2	3	3	5	111		3	1	1	5	5	1	1
1	2	19	2	1	2		3	5	4	2	3	2	5	2	4	3	5	3	3	4	4	1	2	3	5	4	1	4	4	5	5	1	3	4	1	4	4	4	1	3	111		6	5	1	1	1	1	1
1	2	19	2	1	2		3	2	2	4	1	2	4	2	1	1	1	4	1	3	3	2	2	4	5	3	5	4	1	1	2	4	3	3	2	2	1	4	3	3	88		3	4	2	2	5	3	4
1	1	20	2	1	1		1	4	1	2	1	1	5	4	3	1	1	5	1	5	5	5	1	5	4	3	3	1	3	4	1	3	1	2	1	2	1	4	1	4	89		6	4	2	1	6	5	2
1	1	20	2	1	1		5	2	2	2	1	4	2	2	1	2	4	4	4	3	2	3	2	5	4	4	1	4	4	1	2	4	2	4	4	5	4	5	1	5	104		2	2	2	2	2	1	3
1	1	20	1	1	1		3	2	2	4	2	3	1	2	2	2	2	4	3	3	4	2	2	5	3	3	3	2	3	1	1	5	3	3	1	4	1	4	1	1	87		2	1	2	2	2	5	2
1	1	20	1	1	1		4	5	3	5	2	3	4	5	2	3	5	5	4	5	3	2	4	5	5	4	2	3	5	1	2	5	3	4	5	5	5	3	1	1	123		5	6	6	3	5	6	6
1	1	20	1	1	1		1	1	3	1	2	1	1	2	1	2	2	3	1	2	4	4	4	4	3	5	1	2	3	1	2	4	4	3	1	4	3	3	4	2	84		3	3	4	2	5	4	3
1	1	20	1	1	1		1	5	5	1	1	5	5	1	4	1	1	4	1	1	5	4	1	5	4	4	1	1	5	1	1	4	4	4	1	4	1	3	2	5	96		1	2	1	1	1	6	1
1	1	20	2	1	1		3	5	4	3	3	3	4	4	3	2	2	4	2	3	4	3	4	4	4	4	4	5	4	3	2	5	3	4	4	4	3	4	3	4	120		1	2	3	2	5	6	4
1	1	20	1	1	1		1	4	3	1	1	3	2	1	4	5	3	5	1	4	5	4	5	5	4	4	5	5	5	5	2	3	4	1	4	5	1	3	4	5	117		2	1	1	3	5	6	6
1	1	20	1	1	2		5	5	5	2	1	5	5	4	5	5	1	5	5	5	5	5	5	5	5	5	1	5	5	4	1	5	5	1	3	5	4	3	5	5	140		1	1	1	1	1	1	1
1	1	20	1	1	2		2	5	4	1	2	4	4	2	2	3	2	4	2	2	4	4	4	5	3	4	3	2	4	5	4	5	3	3	2	3	2	3	2	4	108		3	2	4	3	1	5	4
1	1	20	1	1	2		4	3	2	1	1	1	1	2	2	1	1	2	1	3	2	1	1	3	1	2	1	2	1	1	1	2	1	2	1	1	3	2	1	2	56		5	4	5	2	6	2	3
1	2	20	1	1	2		1	2	3	4	5	1	2	3	4	2	3	4	5	3	4	5	2	3	4	5	2	3	4	5	4	3	2	1	3	4	4	3	2	1	106		4	3	4	5	4	3	4
1	1	21	2	1	1		3	5	5	2	2	2	5	4	5	3	2	3	1	4	5	5	4	4	3	4	2	2	4	4	2	5	2	4	2	3	2	5	3	3	114		4	5	3	5	1	3	5
1	1	21	2	1	1		5	3	4	4	5	5	5	4	4	3	4	4	5	4	4	5	4	4	4	4	4	4	5	2	2	4	4	3	5	4	3	4	2	5	135		5	5	5	2	2	3	2
1	1	21	1	1	1		4	2	5	4	3	4	5	2	2	3	3	5	4	2	5	2	1	5	2	4	5	5	3	4	5	1	4	4	1	2	1	4	2	4	112		2	2	3	1	2	2	2
1	1	21	2	1	1		2	5	3	4	5	5	5	2	2	3	3	2	1	5	5	4	3	5	1	3	5	2	4	5	1	4	2	5	2	4	2	5	2	5	116		2	6	5	3	4	2	4
1	1	21	2	1	1		5	5	3	5	3	3	3	1	1	4	2	3	4	4	2	2	4	4	3	5	3	4	3	3	4	5	5	5	5	5	3	5	5	5	126		2	5	2	3	5	2	2
1	1	21	2	1	1		2	1	1	3	3	3	2	1	1	1	1	3	1	3	2	1	1	3	1	2	1	2	1	1	1	1	1	1	1	2	1	2	1	1	53		1	3	3	3	1	2	3
1	1	21	1	1	2		2	4	2	5	4	3	2	2	3	1	1	1	2	3	5	3	1	3	1	3	1	1	4	2	1	3	1	3	3	3	3	3	1	4	84		3	1	1	1	1	1	2
1	1	21	2	1	2		3	3	4	4	3	4	5	3	3	2	3	4	1	4	1	2	4	2	1	4	3	4	4	1	4	3	2	3	2	1	1	4	2	3	97		4	3	2	5	5	3	4
1	1	21	1	1	2		3	4	4	3	1	4	4	3	1	3	2	3	1	3	4	2	3	2	4	3	3	2	3	4	2	3	4	2	4	2	3	2	2	4	97		4	5	5	5	5	5	5
1	2	21	2	1	2		5	4	5	5	3	1	5	5	5	4	2	5	1	3	2	5	3	1	3	4	3	5	2	3	3	3	4	4	5	1	2	5	5	4	120		3	2	2	4	5	5	3
1	1	22	2	1	1		3	1	4	4	5	1	5	1	4	1	4	4	5	1	3	3	1	3	2	1	2	3	2	1	1	1	1	1	1	1	5	4	1	1	81		2	3	3	2	3	1	4
1	1	22	2	1	1		3	3	5	1	1	1	5	2	1	1	2	4	1	1	1	2	3	1	1	1	3	2	2	2	2	3	4	3	1	2	2	3	4	2	75		4	5	5	4	3	3	2
1	1	22	2	1	1		5	5	5	3	5	5	5	5	3	4	5	5	5	4	3	5	5	5	5	5	5	5	5	5	5	5	5	5	5	5	5	5	5	5	162		1	1	1	1	6	6	1
1	1	22	2	1	1		5	1	5	3	3	4	5	2	3	1	2	4	2	2	3	2	2	4	4	4	4	5	4	2	2	4	2	3	4	4	3	3	2	3	106		5	5	3	4	3	3	4
1	1	22	1	1	2		5	4	5	4	3	4	4	2	5	4	1	5	1	1	5	5	5	5	5	5	1	1	5	5	1	5	5	4	1	4	1	4	5	5	125		6	2	3	6	6	1	1
1	1	25	2	1	1		2	2	3	1	1	3	3	1	1	1	1	1	1	1	1	1	3	3	1	3	2	2	2	1	2	2	1	1	2	3	1	1	1	1	56		1	1	1	3	2	5	4
1	1	25	2	1	1		3	5	2	2	1	3	3	4	1	3	2	5	3	2	4	3	4	5	3	4	4	1	3	1	5	4	2	1	3	2	1	5	2	3	99		3	1	3	2	2	6	2
1	1	26	2	1	1		5	2	3	5	3	3	5	3	1	2	2	4	1	4	5	2	4	3	3	5	3	4	5	2	1	5	1	2	2	4	3	5	4	4	110		3	2	4	3	5	2	4
1	1	27	2	1	1		3	3	4	5	4	3	5	3	2	2	1	3	2	4	4	3	1	5	4	3	2	2	3	2	2	4	1	5	5	3	1	5	1	2	102		2	3	3	2	2	5	3
1	1	27	2	1	1		5	1	1	1	1	2	5	1	3	1	5	5	1	5	5	2	3	5	5	3	5	5	2	1	5	4	5	5	5	3	1	3	4	2	110		1	5	5	6	6	2	5
1	1	27	2	1	1		5	3	5	2	2	5	5	5	1	1	1	3	1	2	4	2	4	4	3	5	1	3	5	5	5	5	3	2	5	5	1	3	3	5	114		2	3	2	4	4	2	5
1	2	22	1	1	2		2	5	4	4	2	4	5	2	2	4	2	5	5	4	5	4	5	4	5	5	5	2	4	4	2	2	4	4	2	4	2	2	2	4	121		2	5	1	1	1	3	2
1	1	23	2	1	1		2	1	1	2	2	1	5	1	1	1	2	5	1	3	4	1	1	1	2	4	4	2	3	1	1	1	1	1	1	1	1	1	1	2	62		3	1	1	3	4	3	1
1	2	26	2	1	1		5	3	1	3	1	3	4	4	2	1	3	3	1	4	5	2	1	5	4	5	5	1	2	2	5	2	2	5	5	5	3	5	1	2	105		1	5	2	3	6	2	2
1	1	23	2	1	2		3	1	4	3	2	2	1	1	1	1	1	1	1	1	3	3	4	1	3	4	1	1	3	3	1	3	1	3	4	3	1	3	1	4	73		3	2	2	2	4	5	3
1	1	24	2	1	1		2	3	2	1	1	4	1	1	2	1	2	2	4	1	4	1	2	1	1	2	2	1	4	2	1	1	1	1	2	1	1	3	1	1	60		1	5	4	4	2	6	4
1	1	24	2	1	1		5	4	4	3	2	2	4	3	4	2	1	1	1	5	3	2	3	5	3	4	1	4	3	4	4	4	1	4	5	5	5	5	1	1	108		3	1	2	2	1	1	2
1	1	24	2	1	2		4	4	3	1	2	3	3	2	3	1	1	4	3	2	3	3	2	5	3	3	4	2	3	2	1	3	2	4	5	3	1	4	1	4	94		5	5	4	5	2	3	4
1	1	24	2	1	1		3	4	3	4	1	3	3	5	1	1	1	5	3	5	4	3	4	5	5	5	2	5	4	1	4	3	4	5	4	4	5	4	1	5	119		3	6	6	6	6	6	6
1	1	25	2	1	1		5	2	2	5	1	3	5	2	1	2	1	2	1	1	2	2	5	4	2	3	1	3	3	1	1	2	1	2	1	2	1	3	1	2	75		3	2	3	1	3	1	3
2	2	19	2	2			4	3	2	2	2	4	3	3	2	3	3	4	2	2	4	3	3	3	3	4	3	4	4	4	2	5	5	3	2	3	2	5	5	3	109		4	3	2	2	3	4	4
2	2	21	1	2			2	4	2	4	1	4	4	2	2	1	1	2	2	1	3	3	1	4	2	1	2	3	4	1	4	1	1	1	2	4	1	5	1	3	79		5	6	5	2	2	1	5
2	2	21	2	2			5	4	3	4	3	5	5	5	4	4	5	5	2	5	4	5	5	4	5	4	2	3	4	3	3	4	5	4	3	4	4	5	3	5	138		3	1	3	2	3	4	3
2	2	22	2	2			1	2	1	1	1	1	1	1	1	1	1	3	2	2	1	2	1	5	1	2	1	3	3	4	4	1	1	1	1	3	1	3	1	3	61		4	3	4	2	1	2	2
2	3	22	1	2			2	4	4	4	1	4	5	2	4	4	1	5	1	2	3	5	5	4	4	4	4	4	5	5	5	4	4	2	2	3	2	5	4	5	122		2	2	4	5	5	6	3
2	2	23	2	2			5	5	4	5	5	5	5	4	3	1	3	5	1	5	5	5	4	5	3	5	3	5	4	1	2	5	4	5	5	3	3	4	5	5	137		4	6	4	3	6	2	5
2	2	26	1	2			1	4	3	2	3	5	5	5	4	1	4	4	1	5	5	4	3	1	2	5	5	4	5	2	1	4	4	5	2	1	5	2	2	5	114		3	6	6	6	6	2	6
2	2	28	2	2			3	5	2	5	1	2	2	2	1	1	1	3	3	2	3	3	3	4	3	2	3	3	3	4	4	5	2	1	1	5	2	3	1	5	93		4	5	4	5	6	4	3
2	2	34	2	2			4	4	4	4	1	3	4	1	1	1	1	3	1	1	5	1	4	5	3	5	4	4	5	1	4	5	2	2	2	4	1	5	1	3	99		4	5	5	5	4	4	4
2	2	37	2	2			3	4	2	2	1	3	3	1	1	1	2	4	1	2	4	2	2	4	3	4	1	2	4	3	4	5	2	2	2	4	1	3	1	4	87		3	4	5	3	2	6	3
2	1	18	2	2			3	5	5	4	4	4	5	2	4	1	4	5	1	4	2	4	1	5	5	4	3	3	4	4	2	5	2	3	1	5	1	5	1	4	115		2	1	3	1	1	4	2
2	1	18	1	2			1	1	3	1	2	3	5	3	1	1	1	4	3	3	2	1	3	3	3	4	2	5	2	1	3	5	1	2	3	3	2	2	2	2	83		4	1	2	1	4	1	2
2	1	19	1	2			2	3	5	2	1	1	3	2	2	2	3	5	2	2	1	1	4	3	4	3	5	3	2	2	3	1	1	3	3	3	4	3	4	2	90		2	3	3	1	3	3	2
2	1	19	1	2			4	3	5	3	3	4	4	2	4	2	4	3	2	3	2	2	3	4	4	3	3	3	3	3	2	2	2	4	3	3	3	4	2	3	104		5	2	2	5	2	5	4
2	1	19	1	2			4	2	4	4	3	4	4	4	2	2	3	4	4	4	3	4	4	5	4	4	5	4	4	2	2	4	2	5	4	4	4	4	2	5	123		3	3	4	4	5	5	4
2	1	19	1	2			4	3	4	1	3	2	5	1	1	2	1	3	1	1	1	2	2	5	4	4	2	2	2	1	1	5	2	1	1	2	1	2	1	3	76		2	1	1	2	3	3	2
2	1	19	1	2			2	2	4	4	4	4	2	2	2	1	2	4	4	5	4	4	4	2	2	4	2	4	5	4	4	5	5	4	4	5	5	4	2	4	119		1	2	2	5	2	2	5
2	1	19	1	2			2	2	4	4	2	3	3	1	2	1	3	5	2	1	2	3	1	4	3	1	4	4	3	2	4	3	1	1	4	2	1	2	1	3	84		6	2	3	3	6	1	4
2	1	20	2	2			1	3	4	4	1	3	5	1	2	1	1	4	4	4	3	3	2	4	4	2	3	4	4	4	4	3	2	5	4	3	4	5	1	4	106		2	3	2	1	3	1	2
2	1	20	2	2			3	5	2	4	3	4	4	4	2	4	4	3	4	5	3	5	4	4	4	5	1	5	5	4	4	4	3	4	3	4	3	5	4	5	130		3	1	3	3	5	2	3
2	1	20	2	2			4	4	4	5	4	2	5	3	4	4	4	5	3	3	4	4	4	5	4	4	3	4	5	3	4	5	5	4	4	3	2	5	4	5	135		5	5	3	2	5	4	5
2	1	20	2	2			4	5	4	2	3	4	5	3	4	2	4	4	2	4	4	4	2	4	3	4	1	3	4	4	4	5	1	3	4	3	3	4	2	5	117		4	3	3	5	2	3	3
2	1	20	2	2			5	3	1	1	3	3	5	2	5	1	3	4	3	3	3	4	1	5	5	4	5	5	2	5	2	2	2	3	1	1	5	5	1	4	107		4	3	5	5	5	6	1
2	1	20	1	2			3	4	3	2	2	3	4	2	2	2	2	4	2	3	3	3	3	4	3	4	2	2	3	2	2	4	2	3	2	3	2	4	3	3	95		4	2	3	4	2	3	4
2	1	21	1	2			2	4	1	2	1	3	2	2	2	1	1	4	3	3	2	2	4	4	1	3	1	2	3	4	1	3	1	3	1	4	1	4	1	4	80		2	2	3	2	5	1	2
2	1	21	1	2			5	4	4	1	2	3	4	3	3	2	3	5	5	5	4	2	4	4	2	5	3	5	5	5	5	5	5	4	5	4	3	5	4	4	132		2	4	2	2	3	4	3
2	1	21	1	2			1	4	4	4	2	5	4	2	1	2	2	4	1	3	5	4	4	4	3	4	5	4	5	3	5	4	3	4	5	5	5	4	4	5	124		5	4	4	3	2	6	6
2	1	21	1	2			2	3	5	2	2	3	5	3	2	1	2	5	2	3	3	2	3	2	4	5	3	4	4	2	2	5	3	4	2	1	2	2	2	3	98		1	6	3	6	6	6	6
2	1	21	1	2			4	4	4	5	3	5	5	4	2	1	4	5	4	2	4	4	3	5	4	5	4	4	5	5	5	5	2	4	3	4	3	5	2	5	133		2	2	1	5	6	6	3
2	1	22	2	2			2	5	5	3	2	4	2	2	2	3	3	5	1	4	5	3	4	3	3	3	1	1	4	1	2	4	4	4	3	4	2	2	2	2	100		2	2	2	3	3	5	3
2	1	23	1	2			5	5	1	5	1	2	5	4	1	5	1	2	1	5	5	1	5	5	5	5	1	5	5	5	2	5	5	2	1	2	2	5	5	3	117		6	1	6	6	6	1	5
2	1	25	2	2			5	5	4	4	4	4	5	4	5	2	5	5	2	2	4	4	4	2	4	4	2	1	5	5	2	4	5	5	4	4	4	2	4	5	130		5	1	2	5	6	2	3
2	1	26	1	2			3	4	5	4	4	4	5	4	4	4	4	5	3	4	4	5	3	4	4	5	4	5	4	5	3	4	4	4	4	3	4	5	3	5	139		2	1	3	2	2	3	1
2	1	29	2	2			1	1	3	1	1	1	5	1	1	1	1	4	1	1	1	1	1	5	3	3	2	4	2	3	2	1	1	1	2	1	1	3	1	1	62		4	1	3	6	6	6	2
2	1	34	2	2			4	5	5	3	1	2	4	3	1	1	1	4	1	2	2	1	3	4	2	5	1	3	5	3	4	5	1	4	4	4	1	5	1	5	100		1	2	2	5	1	2	2
2	1	21	1	2			4	5	3	3	2	1	4	1	1	1	1	3	1	3	2	2	1	2	4	4	2	2	2	1	1	5	1	2	1	1	1	3	1	4	75		2	4	3	4	2	3	2
2	1	21	2	2			3	3	4	4	4	4	5	2	2	3	3	5	3	2	2	4	3	5	4	2	4	4	3	4	2	3	2	2	4	3	1	4	2	4	109		2	1	1	2	3	2	3
2	1	21	1	2			2	3	3	5	4	3	3	2	3	2	4	4	1	4	4	3	2	3	5	4	2	5	5	4	1	3	3	4	2	5	3	4	1	4	110		3	2	3	1	3	3	4
2	1	21	1	2			1	3	5	3	5	2	3	1	4	4	4	5	4	3	5	5	1	1	1	2	5	5	2	3	5	2	4	2	1	3	1	2	4	1	102		3	1	3	5	5	6	3
2	2	20	2	2			1	2	4	4	4	1	4	5	5	4	3	2	4	2	4	5	2	4	1	3	4	1	1	5	5	2	5	3	5	5	5	3	5	5	118		5	2	5	2	5	5	5
2	2	20	2	2			1	3	2	2	1	4	4	1	1	3	2	4	4	3	4	3	3	4	2	3	2	2	2	4	4	4	3	2	1	3	2	3	1	5	92		2	3	2	1	1	5	5
2	2	21	2	2			3	2	5	4	3	4	4	2	2	2	2	3	2	4	4	3	3	5	3	4	2	2	4	3	2	3	2	5	2	2	2	4	2	4	103		3	3	2	2	3	2	1
2	2	21	2	2			3	4	3	3	3	4	5	4	4	2	4	3	2	5	4	4	5	4	5	4	3	4	2	2	2	4	2	3	2	4	5	4	3	4	119		2	4	1	3	2	2	2
2	2	18	1	2			2	3	1	2	1	4	3	1	1	2	1	4	1	3	2	1	4	3	2	4	2	4	3	2	4	1	4	2	1	2	1	4	3	3	81		5	3	4	3	4	2	4
2	2	20	2	2			2	3	5	4	3	2	5	3	1	1	2	4	2	2	2	2	1	5	1	4	2	3	1	3	5	3	1	3	4	1	1	2	1	2	86		1	1	2	2	3	6	2
2	2	20	2	2			4	3	1	3	1	2	1	1	1	1	1	2	1	3	1	2	1	1	1	1	1	1	2	1	1	4	1	3	1	1	1	1	1	1	52		6	5	5	6	5	2	4
2	2	21	1	2			2	2	1	4	1	2	4	1	2	2	3	4	2	2	3	2	3	2	4	4	2	2	1	3	2	2	1	1	2	3	2	2	1	3	77		2	5	4	4	5	3	4
2	2	21	2	2			3	4	1	2	3	1	2	2	2	1	3	4	1	1	2	2	2	2	4	4	1	3	3	1	2	4	2	1	2	2	2	3	1	1	74		4	4	3	4	2	4	3
2	2	22	2	2			4	4	4	4	1	2	2	1	2	1	2	2	3	2	4	3	2	2	3	3	4	1	2	4	2	5	3	4	1	2	1	3	1	3	87		4	2	3	5	4	3	5
2	3	22	1	2			1	5	3	5	4	5	5	3	4	1	5	5	1	4	5	5	5	5	4	5	4	1	5	4	4	5	4	3	2	1	2	5	2	5	127		6	2	2	5	5	1	3
2	2	23	2	2			1	3	4	2	1	4	5	1	1	1	1	2	1	4	1	1	1	1	1	1	1	1	1	1	1	1	1	2	1	1	1	1	1	1	52		6	6	6	1	4	1	3
2	2	23	2	2			2	2	3	3	4	3	3	4	3	1	2	4	1	1	2	3	3	4	3	4	2	3	4	2	3	2	3	2	2	3	2	2	1	1	87		4	3	4	2	2	4	4
2	2	25	2	2			3	1	3	1	1	4	4	1	1	1	3	3	2	3	1	5	2	4	3	3	3	1	3	1	1	3	1	3	3	1	1	3	1	4	78		6	2	5	6	5	2	5
2	1	18	1	2			2	4	3	1	2	4	2	2	2	2	4	5	4	4	4	2	3	2	4	4	2	2	3	2	3	5	2	4	4	4	2	4	2	4	103		2	5	3	1	5	5	2
2	1	18	2	2			5	2	4	4	2	5	4	1	2	1	4	5	3	4	4	3	1	1	5	4	3	2	4	1	1	4	2	4	5	3	4	5	1	5	108		2	3	3	1	2	5	4
2	1	18	1	2			1	1	2	1	1	2	1	2	1	1	1	3	1	1	1	1	1	3	2	1	1	1	1	1	1	3	1	1	1	1	1	1	1	1	44		6	3	5	6	4	6	5
2	1	18	1	2			2	2	4	2	1	3	2	2	1	1	2	3	1	3	2	1	1	1	1	1	1	2	2	2	3	2	1	1	2	1	1	1	1	4	60		5	2	3	2	4	1	2
2	1	18	1	2			4	4	5	3	2	2	5	1	3	5	4	3	1	1	2	5	5	5	2	5	5	5	5	1	2	5	4	5	4	4	1	4	3	2	117		4	2	4	4	2	4	1
2	1	18	2	2			2	1	2	1	1	2	1	1	1	1	3	3	1	3	1	1	2	3	4	1	1	1	4	1	1	2	1	4	5	4	3	3	1	2	68		4	2	2	1	4	3	2
2	1	19	1	2			1	2	2	2	1	3	1	2	2	1	1	3	1	4	1	1	2	4	3	2	2	1	3	2	1	4	2	4	3	3	1	3	2	3	73		3	6	5	2	6	4	4
2	1	19	1	2			3	2	3	2	4	5	3	3	4	4	3	3	2	4	3	3	3	3	4	3	3	3	3	4	4	2	4	3	3	4	3	3	3	4	110		4	3	6	4	5	5	4
2	1	19	1	2			3	3	4	1	1	4	5	2	3	1	3	1	3	1	2	3	2	1	4	3	2	3	2	1	2	5	2	1	2	4	3	3	3	5	88		4	6	2	5	6	3	5
2	1	19	1	2			2	4	2	4	2	2	2	1	3	1	1	3	4	2	2	3	2	4	4	4	4	3	2	1	1	3	1	3	1	3	2	3	1	4	84		3	4	3	1	2	6	4
2	1	19	1	2			1	3	2	4	1	4	4	1	1	1	1	4	1	3	4	1	1	4	5	4	3	4	4	1	4	4	1	4	3	4	4	4	4	4	98		3	2	2	2	2	1	1
2	1	19	1	2			4	5	5	4	3	5	5	2	3	1	4	5	1	4	3	3	5	5	5	3	1	4	5	3	5	4	5	5	3	5	2	5	2	5	129		1	2	3	2	5	4	3
2	1	19	1	2			2	1	3	2	1	2	3	1	1	1	1	2	1	2	1	2	2	1	2	2	1	2	3	1	2	3	2	2	1	2	1	2	2	1	58		2	4	5	3	2	4	2
2	1	19	1	2			1	2	3	2	1	4	2	1	2	2	1	3	1	4	1	1	2	1	1	3	1	4	3	1	1	1	1	3	1	3	3	2	1	3	66		5	3	4	3	4	5	4
2	1	19	1	2			2	4	2	1	2	3	1	3	3	1	3	4	2	3	2	3	3	4	4	3	4	3	3	1	1	5	3	4	4	2	4	1	1	3	92		3	4	6	3	2	3	3
2	1	20	1	2			4	3	4	4	2	4	5	2	4	2	3	5	2	4	4	2	1	3	4	4	4	5	4	4	2	4	3	4	4	4	4	4	2	5	119		2	3	2	2	4	3	2
2	1	20	1	2			2	1	3	2	2	3	4	2	4	3	2	2	2	3	2	3	2	3	2	3	3	2	4	2	3	2	3	2	3	2	3	2	3	2	86		2	2	2	2	2	2	2
2	1	20	1	2			3	1	3	2	2	2	3	2	1	1	1	1	1	1	1	1	1	2	3	2	1	1	1	1	1	2	1	1	4	1	1	4	1	2	56		2	2	5	2	2	2	2
2	1	20	1	2			4	2	1	2	2	3	5	1	1	1	1	5	1	1	4	1	1	5	1	5	3	5	4	3	3	5	1	4	1	1	1	5	3	1	87		6	1	1	1	5	2	1
2	1	20	2	2			1	2	3	2	1	5	5	1	3	1	3	5	3	4	4	4	2	4	3	1	1	4	4	1	2	3	1	1	2	4	1	3	1	5	90		1	1	1	1	1	2	1
2	1	20	2	2			3	2	1	4	2	2	2	2	1	2	3	1	2	2	2	2	3	4	3	3	4	5	3	1	1	2	3	4	3	2	1	4	3	2	84		6	5	6	4	2	1	3
2	1	20	2	2			4	2	2	4	2	2	2	2	2	1	1	4	2	4	2	2	2	2	4	4	2	4	2	4	2	2	2	4	2	4	2	4	2	2	88		2	4	3	2	2	3	2
2	1	20	1	2			3	4	4	2	4	3	4	3	2	2	2	4	3	2	2	3	2	2	3	4	2	3	4	3	3	4	2	3	2	4	2	3	3	4	100		3	3	2	2	3	5	3
2	1	20	1	2			1	4	2	2	2	4	5	2	1	1	1	5	3	5	2	2	3	2	2	5	1	2	4	1	4	2	2	4	2	5	2	4	2	2	91		3	3	1	1	2	3	3
2	1	20	1	2			2	4	5	2	2	4	4	2	5	1	1	5	5	4	5	2	1	4	4	5	2	2	1	4	4	4	4	4	2	2	4	2	2	2	106		2	2	2	3	2	3	2
2	1	20	1	2			2	2	2	2	1	2	1	1	1	1	1	4	1	1	1	1	1	4	1	2	1	1	3	2	1	1	1	1	1	3	1	1	1	2	52		3	5	5	6	6	6	4
2	1	20	1	2			4	5	3	5	2	5	2	2	1	1	2	4	1	4	4	2	2	5	1	3	2	1	4	4	2	4	2	4	5	2	1	4	1	4	98		5	3	6	2	6	2	5
2	1	20	1	2			4	1	3	4	1	1	2	1	2	1	4	3	1	1	1	1	2	4	3	3	2	1	4	1	1	3	1	3	1	1	1	1	1	2	66		5	2	4	2	5	3	2
2	1	20	1	2			4	2	4	3	2	3	5	2	1	1	3	4	1	2	4	3	3	4	2	4	1	3	5	1	1	4	1	4	3	4	2	4	1	3	94		1	2	3	4	3	2	4
2	1	20	2	2			4	3	4	3	3	2	5	2	1	1	2	5	1	1	1	2	2	4	2	2	4	5	4	3	1	5	2	1	1	1	1	2	1	4	85		6	2	2	1	4	2	2
2	1	20	2	2			3	1	5	4	1	1	5	1	1	1	1	5	1	1	3	3	1	5	5	5	1	3	3	1	2	1	1	4	1	5	4	1	1	2	83		4	4	4	4	4	4	1
2	1	20	1	2			2	2	2	4	3	4	4	2	1	1	1	1	2	3	3	4	4	2	4	3	2	1	3	1	1	4	2	4	3	4	1	4	4	4	90		3	4	5	3	4	1	3
2	1	21	1	2			3	2	4	1	1	2	1	1	2	1	1	3	1	1	2	1	1	3	3	2	2	3	3	3	2	3	3	1	1	3	1	2	1	2	66		4	4	4	3	2	3	3
2	1	21	1	2			5	5	5	4	5	4	5	3	3	3	4	5	5	4	5	5	4	5	5	5	5	5	4	5	4	3	5	4	2	4	4	4	5	4	147		5	2	4	5	1	3	4
2	1	21	1	2			1	2	5	2	2	4	4	1	1	1	1	1	1	3	4	1	2	4	2	4	3	1	4	2	4	4	2	2	5	4	2	4	1	2	86		3	4	5	1	5	4	4
2	1	21	1	2			3	1	4	3	2	3	4	2	1	1	1	4	1	3	4	1	2	4	4	3	3	1	4	1	3	5	1	2	1	1	3	3	1	2	82		6	2	3	4	3	5	5
2	1	21	1	2			2	3	4	4	2	3	4	3	2	3	2	3	1	3	1	1	2	4	3	4	3	2	3	1	1	2	1	3	2	4	2	3	2	2	85		5	4	5	2	5	1	5
2	1	21	2	2			1	3	4	2	1	3	5	1	1	1	2	5	5	3	3	3	3	2	3	4	3	3	4	3	1	1	4	5	4	4	3	1	3	5	99		6	3	2	4	2	4	4
2	1	21	2	2			3	3	4	4	4	5	4	3	2	3	3	4	1	4	4	3	4	4	4	4	2	2	5	2	4	3	2	4	4	4	2	4	4	4	116		4	2	3	2	2	2	2
2	1	21	2	2			4	4	2	4	2	4	2	3	2	1	1	5	5	5	2	1	3	4	4	4	2	2	1	2	4	4	1	4	4	4	4	4	2	5	105		2	1	1	5	6	6	2
2	1	21	2	2			3	4	3	2	2	2	4	3	2	1	2	5	4	4	2	2	2	4	3	4	2	1	2	2	2	1	2	4	2	4	2	2	2	2	88		4	4	3	5	6	1	3
2	1	21	2	2			3	5	4	1	1	1	3	1	5	1	1	4	1	1	1	2	3	3	2	3	3	4	4	5	4	2	5	5	1	2	1	4	3	5	94		4	3	1	2	6	6	4
2	1	21	2	2			2	4	1	3	3	4	2	2	3	2	3	5	1	4	4	3	2	4	4	4	1	2	3	3	2	3	2	5	4	4	4	3	1	4	101		5	6	4	2	3	5	2
2	1	21	1	2			2	5	5	1	2	3	3	3	2	1	1	3	3	2	2	5	4	5	1	4	3	2	4	4	2	3	1	2	1	5	1	4	2	4	95		3	1	3	3	1	1	4
2	1	21	1	2			2	2	2	2	2	3	2	2	2	2	2	4	2	2	2	2	2	3	3	3	2	2	3	4	4	2	4	2	4	3	2	2	2	5	87		2	2	2	2	3	2	3
2	1	21	2	2			2	4	3	2	1	1	3	1	1	1	2	4	4	4	3	1	2	2	5	3	2	4	1	2	1	2	2	4	4	2	4	4	3	4	88		4	1	5	4	1	6	3
2	1	22	1	2			4	5	2	2	2	4	3	1	1	1	1	5	2	3	4	3	3	1	4	4	1	1	1	2	2	5	2	2	1	4	1	3	1	3	84		5	2	2	2	4	2	4
2	1	22	2	2			2	4	1	4	1	4	1	2	1	2	3	3	1	1	3	2	3	4	1	2	3	4	4	2	2	2	4	2	3	2	1	1	3	4	82		1	1	1	3	1	6	3
2	1	22	2	2			2	2	2	2	1	3	3	2	3	2	3	3	2	3	2	2	2	2	2	3	2	2	2	2	2	2	2	2	2	2	2	2	2	3	75		1	4	4	2	2	3	2
2	1	22	2	2			3	3	2	2	1	3	2	1	1	1	1	2	1	3	4	2	3	2	2	3	2	4	3	2	3	4	2	4	4	3	1	3	2	4	83		3	5	5	4	5	6	5
2	1	22	2	2			4	4	4	3	3	3	4	3	1	3	2	4	2	4	4	3	3	4	4	4	3	4	4	2	3	3	3	2	3	2	2	3	2	4	106		2	2	4	3	4	5	4
2	1	23	1	2			3	2	4	2	2	3	4	2	1	1	2	4	2	3	3	2	3	3	3	4	3	4	3	1	4	3	2	3	1	4	3	3	2	4	93		3	4	4	3	5	4	3
2	1	24	1	2			3	2	2	2	2	1	1	1	1	1	1	2	1	1	1	1	1	1	2	2	2	1	2	1	1	2	1	2	2	1	1	2	1	1	49		3	6	5	1	6	4	4
2	1	24	2	2			5	4	3	3	3	4	3	2	2	2	5	3	1	3	2	2	3	4	4	2	3	4	4	2	2	2	1	4	2	2	2	3	2	4	97		3	2	2	4	5	5	4
2	1	25	2	2			4	5	3	1	4	1	1	1	2	1	1	5	5	4	4	3	3	5	4	5	5	4	2	1	1	1	1	2	1	3	4	5	1	3	96		5	6	1	1	1	6	2
2	1	27	1	2			1	2	1	1	1	2	1	1	1	1	1	2	1	1	1	2	3	1	2	3	1	3	4	5	3	5	3	2	4	4	2	3	1	5	74		3	6	6	3	3	1	1
2	1	27	1	2			1	5	5	1	3	4	3	5	1	5	1	5	1	1	5	3	3	3	1	5	3	1	1	1	1	1	5	1	1	1	1	5	1	3	87		6	1	4	1	1	1	1
2	1	27	1	2			1	5	5	1	1	5	1	5	1	5	1	5	1	1	5	1	1	1	1	1	1	1	1	1	1	1	5	1	1	1	1	5	1	1	70		6	1	6	1	1	1	6
2	1	28	2	2			3	5	4	5	4	2	4	2	1	1	2	5	5	5	4	4	2	4	3	5	1	2	4	3	2	5	3	5	4	3	3	4	2	3	114		3	4	3	1	2	1	1
2	2	23	1	2			3	4	3	3	3	2	4	1	2	3	2	5	2	1	1	3	4	3	2	4	2	2	1	1	3	3	4	3	2	1	1	3	1	4	86		2	2	2	4	3	5	2
2	2	25	2	2			4	4	2	5	1	1	5	3	1	1	1	5	3	1	2	4	5	4	2	4	2	5	2	2	1	5	4	3	4	5	1	5	1	5	103		6	6	5	6	6	3	6
2	2	25	2	2			1	2	4	3	1	5	3	1	1	1	1	5	1	2	2	2	1	4	3	5	1	3	5	1	1	2	1	2	1	1	1	1	1	4	73		6	5	5	1	5	1	2
2	1	20	1	2			2	2	3	3	2	2	2	2	2	2	2	3	2	1	1	1	1	2	2	2	1	1	2	1	1	1	1	1	1	1	1	1	1	1	54		4	2	2	4	4	3	5
2	1	21	2	2			3	4	2	2	2	4	2	2	2	2	2	4	2	3	4	2	2	3	4	3	2	1	3	1	2	3	2	3	2	4	3	2	2	3	87		4	5	6	1	5	5	4
2	1	21	1	2			4	4	4	4	5	3	4	2	1	1	1	4	2	4	4	3	2	5	3	4	3	2	3	3	4	4	2	3	4	2	4	3	1	4	106		2	5	6	5	2	6	5
2	1	21	1	2			2	3	5	4	1	2	4	1	2	3	3	5	1	4	2	3	2	5	3	3	2	4	3	2	5	2	2	4	2	4	3	4	1	2	98		3	3	2	2	4	1	1
2	2	20	2	2			5	5	5	5	4	5	5	5	4	2	4	5	1	3	4	2	4	4	4	4	3	5	4	3	2	5	5	4	5	4	2	5	2	5	134		2	3	1	1	5	1	2
2	2	20	2	2			2	4	3	1	1	4	5	1	1	1	1	1	2	1	3	5	2	2	4	5	4	5	5	2	4	5	1	3	5	5	1	2	1	2	94		6	6	4	5	4	2	2
2	2	20	2	2			5	3	4	3	2	4	4	2	2	2	3	5	1	2	4	2	2	5	2	4	3	4	3	5	3	2	5	2	2	3	3	4	1	4	105		4	6	4	2	2	3	3
2	2	20	2	2			5	2	3	4	2	4	3	3	2	2	4	2	1	3	2	3	1	3	4	3	3	3	4	1	1	5	2	3	3	4	2	4	2	5	98		3	1	2	4	4	2	1
2	2	21	2	2			2	2	1	1	2	4	2	2	1	1	1	2	2	1	1	1	2	1	1	3	1	5	1	1	1	2	2	1	1	2	1	3	1	1	56		6	5	4	2	4	4	5
[truncated: 21 more columns]

## Sheet: ASMR correlations
2. What is your gender?Female-1, Male-2, Other-3	2.a. If you selected Other, please specify:	3. What is your age?	4. Do you attend Bath Spa University?1-Yes, 2- No	5. Having read the description would you say you ever experience ASMR whether it is from watching such videos or in everyday life? Would you classify yourself as somebody who experiences ASMR? Yes-1, No-2	6. Do you watch ASMR videos?Yes-1, No-2	7. Why do you watch ASMR videos? Is it to experience the tingles, relax, fall asleep? Please specify.	RELAX	SLEEP	ASMR	ANXIETY	CONCENTRATION	8. How many ASMR videos do you typically watch in a single session?	8. How many ASMR videos do you typically watch in a single session? Coded/averaged where range given	9. How often do you watch ASMR videos? Never-1, less than once a month-2, 2-3 times a month-3, 2-3 times a week -4, daily-5	10. Do you require specific conditions to achieve ASMR?Yes-1, No-2	11. Please briefly describe the conditions you require to achieve ASMR sensations (eg. busy, quiet room, bright lighting etc.	COMFORT	QUIET	DIM LIGHTING	ALONE	HEADPHONES	BED/LYING DOWN	TEMPERATURE	REAL LIFE	12. Please indicate whether or not these common stimuli trigger your ASMR - please select all the items that trigger your tingling sensations while viewing ASMR videos in your daily life. DUE TO A TECHNICAL ISSUE WITH THE SURVEY WHICH DIDN'T ALLOW TO TICK MORE THAN ONE ANSWER THIS QUESTION HAD TO BE DISCARDED FROM ANALYSIS	12.a. If you selected Other, please specify:	13. Please indicate how intense the ASMR experience is on average when engaging with those stimuli. Intensity Scale (higher numbers represent increasing intensity): 0 = No Tingles 1 2 3 = Moderately Intense 4 5 6 = Most Intense ASMR Experience For example, if whispering triggers the most intense tingles for someone, they would label that stimulus a "6".	13.1. Crisp sounds (tapping/crinkling)	13.2. Personal attention	13.3. Whispering	13.4. Role-plays (eg. visit to hairdresser, spa, doctor)	13.5. Hair brushing	13.6. Paying attention to detail, concentrating on something, slowly performing mundane actions or explaining something	13.7. People eating	AVERAGE INTENSITY SCORE	14. Does the intensity of these tingles vary from session to session of ASMR video viewing?YES-1, NO-2	15. On average, how pleasurable is the ASMR experience?1- Quite Uncomfortable, 2- Mildly Uncomfortable,3- Neutral, 4- Mildly pleasurable, 5- Quite pleasurable	16. Please select the degree to which you agree with the following statements on a sale of 1 (Disagree Strongly) – 5 (Agree Strongly).	16.1. Sometimes I feel and experience things as I did when I was child.	16.2. I can be greatly moved by eloquent or poetic language.	16.3. While watching a movie, TV show or a play, I may become so involved that I may forget about myself and my surrounding and experience the story as if it were real and as if I were taking part in it.	16.4. If I stare at a picture and then look away from it, I can sometime “see” an image of the picture almost as I were still looking at it.	16.5. Sometimes I feel as if my mind could envelop the whole world.	16.6. I like to watch cloud shapes change in the sky.	16.7. If I wish, I can imagine (or daydream) some things so vividly that they hold my attention as a good movie or story does.	16.8. I think I really know what some people mean when they talk about mystical experiences.	16.9. I sometimes “step outside” my usual self and experience an entirely different state of being.	16.10. Textures – such as wool, sand, wood – sometimes remind me of colours or music.	16.11. Sometimes I experience thing as if they were doubly real.
1		20	2	1	1	Relaxes me To fall asleep	1	1				5	5	4	1	On my own Comfortable environment e.g. in bed	1			1		1			Crisp sounds (tapping/crinkling)			6	5	5	3	6	2	2	4.14286	1	5		1	4	1	2	1	1	5	4	3	1	1
2		21	2	1	1	It was out of curiosity at first, now to relax and experience tingles.	1		1			1	1	3	1	Quiet room, headset, no specific lighting.		1			1				Crisp sounds (tapping/crinkling)			4	1	3	1	0	0	2	1.57143	1	4		5	4	3	4	1	5	4	1	2	1	3
2		22	2	1	1	I watch them to help me fall asleep, as well as when I am working/revising as a way to relax and concentrate on what I am doing		1			1	4	4	5	1	Quiet room, slightly cooler temperature, videos being played through speakers (not headphones/earphones)		1					1		Role-plays (eg. visit to the hairdressers, spa, doctors)			0	5	5	6	3	4	0	3.28571	1	5		4	3	4	2	2	5	3	2	2	3	4
1		20	1	1	1	I have found that ASMR helps me to go sleep, especially if I’m struggling to put my mind to ease		1				5-10 (depending on the length of film)	7.5	4	1	Quiet room, in bed, at night		1				1			Hair brushing			5	2	4	0	6	1	3	3	1	4		3	4	5	4	4	4	4	4	3	4	2
1		18	2	1	1	Relax and fall asleep	1	1				1-2	1.5	4	1	Quiet room In my bed		1				1			Paying attention to detail, concentrating on something, slowly performing mundane actions or explaining something			1	4	1	2	1	3	0	1.71429	1	4		3	1	1	1	2	1	2	1	1	1	1
1		20	1	1	1	To experience the tingles			1			1-2	1.5	2	1	With headphones and a more quiet room		1			1				Other	(It wouldn’t let me select more than one) crisp sounds and whispering		5	1	6	0	2	0	1	2.14286	1	4		2	4	5	4	1	3	4	3	2	1	1
1		22	2	1	1	Usually to help me get to sleep		1				One	1	2	1	Quiet, dark room, directional earphones		1	1		1				Other	Multiple choice didn't work. Whispering and mouth sounds/breathing mainly		1	4	6	0	2	0	5	2.57143	2	5		3	1	4	4	5	1	5	1	4	1	4
1		21	2	1	1	To relax and tune out of my thoughts for a while	1					3	3	4	2										Crisp sounds (tapping/crinkling)			6	2	3	3	0	4	4	3.14286	1	4		3	5	5	2	2	2	5	4	5	3	2
1		22	2	1	1	I watch asmr to feel tingles and to go to sleep		1	1			2	2	5	2										People eating			5	6	6	5	5	4	4	5	1	4		5	4	4	3	3	4	5	2	3	5	4
1		35	2	1	1	Most times I resort to them when feeling stressed and nothing else really helped (meditation, exercise, talking, music, etc). I also turn to it when having difficulty getting to sleep	1	1				1-2	1.5	3	2										Paying attention to detail, concentrating on something, slowly performing mundane actions or explaining something			5	3	1	2	6	6	3	3.71429	1	5		5	5	5	5	4	3	5	4	5	5	4
1		24	2	1	1	To relax, fall asleep, and get tingles.	1	1	1			Depends on the length of the video. If it's a shorter video (under 30 min.), I tend to watch more than one. If it's a longer video (more than 30 min.), I generally only watch one video.		5	2										Crisp sounds (tapping/crinkling)			6	4	4	3	4	0	0	3	1	5		4	5	5	4	5	4	5	4	5	1	5
2		35	2	1	1	Relax, with tingles	1		1			One	1	3	1	Usually, but not always, a quiet environment, with no music playing, no traffic noise.		1							Whispering			4	3	6	4	3	6	0	3.71429	1	5		5	5	5	5	3	4	5	4	4	4	4
1		64	2	1	1	I don't view the videos but I do convert them to audio and listen to them on my ipod. I use them for all of the things you mention-tingles, relaxing and help falling asleep. Viewing them takes me out of the moment.	1	1	1			I listen to 1 at a time.	1	4	2										Other	There are certain sounds that are hard to describe. One is a certain sound of the tongue making a sound on the roof of the mouth or certain sounds the lips can sometimes make when someone is speaking. Only certain people make these sounds.		1	1	3	0	0	1	0	0.857143	1	5		4	3	1	1	1	2	1	2	1	1	1
1		55	2	1	1	Sometimes to experience the tingles, but mostly to relax.	1		1			1-2	1.5	3	2										Crisp sounds (tapping/crinkling)			4	6	4	1	6	0	0	3	1	4		4	5	2	3	1	4	4	3	2	3	3
2		33	2	1	1	fall asleep & occassional tingles		1	1			2	2	5	2										Personal attention			2	5	3	5	2	0	0	2.42857	1	4		4	2	5	5	3	4	5	2	2	1	1
1		37	2	1	1	Experience tingles/chills. Relaxes me. Helps me relax and fall asleep	1	1	1			1-2	1.5	4	1	Quiet, dark, comfortable mostly. Sometimes I experience it when I’m at a store/checking out/ or certain people have this sort of energy that I experience tingles with and it relaxes me too	1	1	1					1	Whispering			3	2	4	3	3	2	0	2.42857	1	4		3	1	2	2	1	1	1	1	1	1	1
1		20	2	1	1	Helps me to relax and fall asleep	1	1				2	2	3	1	Peace and quiet and if the people in the videos have soothing voices and aren’t loud and quick with their movements		1							Whispering			5	2	6	2	5	5	0	3.57143	2	5		5	2	2	2	1	4	2	2	1	2	4
1		21	2	1	1	To relax, mostly to fall asleep	1	1				1 or 2	1.5	5	2										Personal attention			3	6	5	5	4	4	0	3.85714	1	5		3	5	5	2	2	2	2	3	1	1	1
1		27	2	1	1	I generally feel tingling in my back, neck, and behind my ears. It's relaxing and pleasurable. At times it could put me to sleep		1	1			5-10 if short, 1 if long	7.5	4	2										Whispering			4	4	6	3	4	4	0	3.57143	1	5		5	5	5	2	3	4	5	5	2	5	3
1		22	2	1	1	I watch ASMR for relaxation, fun, and sleep.	1	1	1			About 4-10 idk	7	4	2										Whispering			4	4	5	5	3	3	1	3.57143	1	5		3	3	5	1	1	1	5	2	1	1	2
1		28	2	1	1	All three - in order to experience tingles, in order to relax and in order to fall asleep.	1	1	1			1-3	2	5	1	I need to be "tuned in" in order to achieve ASMR sensations. I need to not be busy doing other stuff, and I need to have the time and expect to get tingles in order for it to work best. Also, I need headphones in order to get tingles.					1				Paying attention to detail, concentrating on something, slowly performing mundane actions or explaining something			4	6	3	5	4	6	0	4	1	5		5	3	4	5	3	5	5	3	4	4	3
1		34	2	1	1	To relax, help fall asleep, relieve anxiety. Also some of the role plays are fun, entertaining, and can even be educational.	1	1	1	1		2	2	5	1	A quiet, cool room is helpful. The phenomenon, however, can be unpredictable. Sometimes I can do everything "right," and no tingles, and sometimes I am surprised by what triggers the sensation. Recent triggers include: soft voice with pleasing cadence, sorting papers, fingernails tapping.		1					1		Role-plays (eg. visit to the hairdressers, spa, doctors)			5	4	4	5	5	2	0	3.57143	1	5		3	4	5	3	2	3	4	3	3	3	4
2		37	2	1	1	sleep		1				1	1	3	2										Whispering			2	4	5	3	1	4	0	2.71429	1	4		2	3	2	4	3	2	2	1	1	3	2
2		33	2	1	1	I watch ASMR videos to experience the tingles, and to relax. They do not make me fall asleep	1		1			Usually 2	2	5	1	Absolute quiet, in a dark or dimly lit room. No distractions, usually the temperate is cool		1	1	1			1		Whispering			3	5	6	5	0	5	0	3.42857	1	4		2	1	1	1	1	1	1	1	1	1	1
2		27	2	1	1	Tingles and relaxation, headache relief.	1		1			10	10	4	2										Other	Only lets me select one. In order from above: yes, yes, no, yes, no, yes, no		5	6	0	4	1	5	0	3	1	5		3	5	4	4	5	2	5	2	1	3	2
1		20	1	1	1	Help relax and fall asleep	1	1				3	3	4	1	Quiet room		1							Paying attention to detail, concentrating on something, slowly performing mundane actions or explaining something			5	1	2	0	3	3	0	2	1	4		3	2	2	4	2	3	1	2	2	2	2
2		21	2	1	1	To relax and fall asleep. Periodically just to experience the tingles while doing a task.	1	1	1			2-3	2.5	4	2										Paying attention to detail, concentrating on something, slowly performing mundane actions or explaining something			3	5	5	5	2	6	0	3.71429	1	5		3	4	2	5	2	4	1	1	1	4	5
1		23	2	1	1	I suffer from major depressive disorder and ASMR is the only thing I find myself somewhat relieved. I experience tingles, I always have but I think ASMR became more than tingles for me. I would consider myself addicted if I knew that these videos have a bad effect on me.				1		5	5	5	2										Personal attention			2	6	4	2	2	2	1	2.71429	1	5		4	4	5	4	5	4	5	5	5	5	4
1		20	1	1	1	To experience tingles, I’m intrigued about the shapes and colours and sounds. It makes me curious and makes me feel relaxed	1		1			5	5	4	2										Hair brushing			2	0	0	0	6	5	0	1.85714	2	5		4	5	3	5	2	3	4	5	2	3	5
1		20	1	1	1	Tend to watch them to relax before going to sleep	1					20	20	4	2										People eating			0	0	0	0	2	1	6	1.28571	1	4		1	1	3	1	2	1	1	2	1	2	2
3	Genderfluid - mostly F	26	2	1	1	To help me fall asleep		1				5	5	5	1	nothing touching my head, close attention, concentration, sometimes learning factors (like a teacher rp or survey being taken)									Paying attention to detail, concentrating on something, slowly performing mundane actions or explaining something			1	1	1	2	1	3	1	1.42857	1	4		3	5	5	5	4	5	4	4	5	4	4
1		32	2	1	1	Tingles, relaxation, sleep, emotional comfort	1	1	1	1		2	2	2	1	I usually need to have an earbud in my left ear to achieve tingles from audio stimulations. Visual stimulations just need to be reasonably close to my face.					1				Other	This item needs to be changed to multi-select instead of single select. Whispering, eating, crisp sounds, hand movements close to the camera		5	3	6	1	3	1	6	3.57143	1	5		4	4	4	4	3	3	5	3	2	2	2
1		18	2	1	1	To experience tingles and to relax me before I sleep.	1		1			1-5	3	5	1	Very very quiet (when watching videos, not in real life), not too warm, no harsh lighting or other harsh stimuli		1	1				1		Other	It wouldn't let me select these individually, but tapping, personal attention, attention to detail, roleplays, whispering/soft voices, repetition (of actions or words), hand movements, reiki		0	6	5	3	0	6	0	2.85714	1	5		4	5	5	2	3	1	5	1	1	1	1
1		34	2	1	1	Experience tingles, relax or re-focus my mind when stressed, helps me sleep when stressed or not tired	1		1			1-5	3	4	1	Quiet space with little or no distractions.		1		1					Paying attention to detail, concentrating on something, slowly performing mundane actions or explaining something			1	5	4	3	2	6	0	3	1	5		3	3	3	3	1	2	5	1	1	1	1
1		21	2	1	1	Mostly to fall asleep, but occasionally just for the tingles.		1	1			3	3	5	2										Role-plays (eg. visit to the hairdressers, spa, doctors)			5	6	6	6	5	5	1	4.85714	1	5		4	3	4	2	3	3	5	4	3	1	3
1		24	2	1	1	It's mesmerizing.			1			3	3	3	2										Paying attention to detail, concentrating on something, slowly performing mundane actions or explaining something			2	5	1	5	0	6	3	3.14286	1	5		5	2	4	2	4	4	3	3	2	1	2
1		20	1	1	1	I like the sounds, some of them relax me	1		1			6	6	4	1	Headphones, can’t get the same effect when it’s played through a speaker					1				Crisp sounds (tapping/crinkling)			6	2	4	2	3	0	0	2.42857	1	4		1	5	5	1	1	5	5	1	4	1	1
1		26	2	1	1	To help me sleep. Also to help me relax and some times just to tingle for fun but mostly for sleep.	1	1	1			1 to 2	1.5	5	2										Role-plays (eg. visit to the hairdressers, spa, doctors)			3	5	6	6	6	4	1	4.42857	1	5		5	2	3	5	3	3	5	3	1	2	2
1		25	2	1	1	Generally for sleeping, but sometimes to help me calm down	1	1				First few minutes of around 5 or 6 till I find the right one	5.5	5	1	Quiet room, laying down		1				1			Whispering			2	1	6	2	3	0	6	2.85714	1	3		2	2	3	1	1	3	3	1	1	1	1
1		26	2	1	1	Both to fall asleep and to experience tingles.		1	1			5	5	5	2										Role-plays (eg. visit to the hairdressers, spa, doctors)			6	5	4	6	2	6	0	4.14286	1	3		4	1	3	2	4	3	5	3	4	1	1
2		21	1	1	1	relax	1					2	2	2	2										Paying attention to detail, concentrating on something, slowly performing mundane actions or explaining something			1	1	0	5	3	5	0	2.14286	1	5		2	3	3	4	3	4	4	3	2	1	2
2		20	1	1	1	Helps me feel relaxed/fall asleep.	1	1				1-5	3	4	2										Other	Can't select more than one: Tapping and whispers.		4	3	5	4	2	2	0	2.85714	1	4		3	3	4	2	1	2	4	1	2	1	3
1		28	2	1	1	All 3 of them above.	1	1	1			5-7	6	4	2										Paying attention to detail, concentrating on something, slowly performing mundane actions or explaining something			4	4	4	5	2	5	4	4	1	5		4	4	3	3	3	4	5	3	3	1	3
1		31	2	1	1	Experience the tingles			1			2	2	3	1	I get ASMR much more often from real life scenarios than videos.								1	Personal attention			1	6	1	1	5	5	0	2.71429	1	5		5	5	3	5	1	5	2	5	3	1	1
1		29	2	1	1	I enjoy the tingling sensation, and it relaxes me and helps me fall asleep.	1	1	1			2	2	4	1	if I'm watching videos, I need to be alone in a quiet room (preferably dark) and be wearing headphones.		1	1		1				Whispering			2	4	6	4	0	4	0	2.85714	1	5		4	5	4	3	2	4	4	4	2	1	2
1		26	2	1	1	To help sleep, relax and calm anxiety	1	1		1		one video	1	5	1	Has to be in a quiet setting, otherwise distractions and other sounds take away from experiencing asmr		1		1					Other	Many above(only option to pick one) crisp sounds, whispering, and paying attention to detail etc, hand movements		5	3	4	3	2	5	1	3.28571	1	5		5	2	4	1	2	3	5	4	3	1	1
2		31	2	1	1	To experience tingles, to fall asleep		1	1			3	3	4	1	Silent room, no distractions		1		1					Personal attention			2	6	4	4	1	6	0	3.28571	1	5		3	4	3	2	4	4	4	1	2	3	4
1		30	2	1	1	Reduce anxiety, to feel calm	1			1		3-4	3.5	3	1	I usually must be alone or uninterrupted (if anyone is nearby), my environs need to be quiet/calm. No other noticable stimuli can be present.		1		1					Paying attention to detail, concentrating on something, slowly performing mundane actions or explaining something			2	3	2	2	4	5	0	2.57143	1	4		1	5	1	2	1	1	5	1	1	1	2
1		23	2	1	1	I watch ASMR to relax, fall asleep and help lessen my anxiety	1	1		1		5	5	5	1	A soft spoken female voice, mostly at night time, quiet and dark room		1	1						Crisp sounds (tapping/crinkling)			5	3	1	5	2	6	2	3.42857	1	5		5	3	4	4	4	3	5	4	5	2	4
1		23	2	1	1	Ideally to experience tingles but it’s not often I actually get them from videos. Usually to relax.	1		1			2-3	2.5	3	1	Cold, dark, quiet, with earphones.		1	1		1		1		Personal attention			3	6	5	5	4	4	0	3.85714	1	5		4	4	3	1	1	2	5	1	5	1	2
1		35	2	1	1	Bedtime		1				3	3	5	1	Alone, quiet, dark		1	1	1					Role-plays (eg. visit to the hairdressers, spa, doctors)			3	5	4	6	6	4	0	4	1	4		3	4	3	3	1	3	1	1	1	1	1
1		22	2	1	1	Yes						2	2	5	2										Paying attention to detail, concentrating on something, slowly performing mundane actions or explaining something			4	5	5	5	0	6	0	3.57143	1	5		5	5	5	3	5	5	5	5	3	4	5
1		34	2	1	1	To relax, to calm anxiety, to concentrate on a task, and to fall asleep.	1	1		1	1	1 or 2	1.5	5	1	In real life either one on one personal attention or one person speaking to a group. For videos I need headphones.					1			1	Personal attention			2	6	0	6	1	4	0	2.71429	1	5		5	2	4	5	5	4	5	1	3	1	4
2		25	2	1	1	Just to get the feeling.			1			Two or three.	2.5	3	1	I need to be alone.				1					Paying attention to detail, concentrating on something, slowly performing mundane actions or explaining something			4	5	4	2	3	5	3	3.71429	1	5		3	4	2	2	1	2	4	2	2	1	2
1		22	2	1	1	I watch to fall asleep and relax at night.	1	1				2-3	2.5	5	2										Whispering			0	5	6	1	4	2	0	2.57143	1	4		5	1	5	3	3	4	5	2	3	1	2
1		28	2	1	1	Mainly to relax and sleep, I only sometimes get full on tingles but still usually get a physically relaxed feeling from the videos	1	1	1			5	5	5	2										Crisp sounds (tapping/crinkling)			6	3	2	0	1	0	0	1.71429	1	4		2	4	2	1	1	2	3	1	1	1	1
1		28	2	1	1	I watch for the tingles before bed. I also listen to ASMR videos/Spotify at work to keep my stress down and better focus on work. Finally I also watch when I feel lonely or anxious and need something calming.		1		1	1	3-6	4.5	5	1	At work, I listen to audio triggers because I can still get the sensations without having to be visually distracted from my tasks. When in bed, darkness is best			1			1			Hair brushing			5	5	3	3	6	2	0	3.42857	1	5		5	4	4	3	3	4	3	3	3	1	2
2		26	2	1	1	Before sleep, relaxing, while working. I do experience tingles	1		1		1	1 to 2	1.5	5	2										Personal attention			4	6	6	2	1	1	0	2.85714	1	5		5	3	1	3	1	3	4	4	2	1	3
1		32	2	1	1	Tingles and to fall asleep		1	1			2-3	2.5	5	1	Dark, quiet room with headphones		1	1		1				Role-plays (eg. visit to the hairdressers, spa, doctors)			5	6	2	6	6	0	0	3.57143	1	5		4	5	5	2	4	5	5	5	2	1	1
2		22	2	1	1	Doesn't make me fall asleep, but it puts me in a lightly drowsy/hhypnotic statee I'm better prepared to attempt sleep	1					3-5	3.5	5	2										Whispering			4	5	6	5	2	5	0	3.85714	1	5		2	5	1	2	1	5	5	5	1	2	1
1		33	2	1	1	To fall asleep, but if not to sleep, to relax and experience tingles.		1	1			1.5	1.5	4	1	Being comfortable and relaxed, and undisturbed. Soft lights/darkness.	1		1						Personal attention			2	5	5	2	3	0	0	2.42857	1	4		3	5	5	3	4	4	5	5	1	1	1
1		27	2	1	1	Tingles and relaxation Sleep but also at work when I need to calm down	1	1	1	1		1 or 2	1.5	5	2										Whispering			3	4	6	2	1	5	1	3.14286	1	4		3	3	4	5	4	3	5	3	2	2	1
1		34	2	1	1	The tingles and relaxation	1		1			2 or 3	2.5	4	1	Normally, I ned a quiet place, however I sometimes get tingles in a busy enviroment.		1							Other	People biting nails, hair being cut, scratching specific fabrics, soap being cut, people eating		3	2	2	3	6	6	6	4	1	5		5	3	2	5	2	3	5	4	3	2	4
1		25	2	1	1	All of the above. Relax, sleep and tingles.	1	1	1			2-4	3	5	2										Personal attention			4	5	3	4	1	4	0	3	1	5		3	5	2	2	1	3	3	4	1	3	2
1		34	2	1	1	Relax and falling asleep.	1	1				1-2	1.5	5	1	Quiet surroundings, alone.		1		1					Personal attention			5	5	4	5	5	5	2	4.42857	1	5		5	5	5	4	5	4	5	5	5	2	5
1		25	2	1	1	Both for tingles and help with falling asleep.		1	1			2-3	2.5	5	1	A quiet room.		1							Crisp sounds (tapping/crinkling)			5	2	0	2	5	4	3	3	1	4		5	2	2	5	1	3	5	2	1	2	1
1		30	2	1	1	To relax, and for the tingles.	1		1			3	3	4	1	Quiet room, not too warm.		1					1		Role-plays (eg. visit to the hairdressers, spa, doctors)			3	4	5	6	6	3	0	3.85714	1	5		3	4	4	4	2	4	4	3	2	3	3
1		23	2	1	1	To help fall asleep better. Tingles are just a bonus.		1	1			5	5	5	2										Personal attention			5	6	3	4	1	5	2	3.71429	1	5		3	3	5	2	4	3	5	3	1	1	3
1		28	2	1	1	To experience tingles and to relax. Not directly to fall asleep (I get to focused to actually do that) but sometimes to relax prior to sleeping to better be able to sleep later. Also sometimes just to enjoy the creativity of the ASMR artists, perticularly on roleplay/story type videos.	1		1			1-4	2.5	4	1	Must be wearing headphones for the sounds/videos... Or be in a safe space with close friends for IRL triggers related to smell, personal care like doing f.eg. hair or makeup, or have someone I'm confortable with stroke my back lightly, f.eg. "draw" patterns for me to guess.					1			1	Other	All above expect eating sounds, though attention to detail only in combination with the others... Also water sounds, like water and ice in a bottle, dripping or flowing water etc. And good stories, not nessesarily on a role play way.		6	5	6	6	5	3	0	4.42857	1	5		3	4	5	5	3	5	5	1	5	1	3
2		38	2	1	1	Mostly for relaxation (to sleep) or to relieve anxiety.	1	1		1		10	10	4	2										Whispering			0	5	6	4	5	5	0	3.57143	1	5		3	2	4	2	1	4	4	1	1	1	1
1		23	2	1	1	To experience tingles and help me get tired if it’s bedtime and I’m not feeling ready for bed.	1		1			Many but I don’t sit and watch full videos, I skip through and watch parts of each one. Maybe 10-15.	12.5	4	2										Personal attention			4	6	6	5	3	6	0	4.28571	1	5		2	1	1	2	2	1	5	1	1	1	2
1		29	2	1	1	Experience tingles, relax, help me focus on something (while working on said thing)	1		1		1	2	2	4	2										Whispering			4	6	6	4	3	6	3	4.57143	1	5		1	1	2	1	1	2	1	3	2	2	1
1		27	2	1	1	To relax, unwind, and sleep.	1	1				1-2	1.5	5	1	Alone with no interruptions: relaxation time.				1					Role-plays (eg. visit to the hairdressers, spa, doctors)			0	4	5	6	5	4	0	3.42857	1	5		5	1	1	1	1	2	5	1	3	1	5
1		27	2	1	1	To relax or sleep.	1	1				1	1	3	1	Not to be under any tipe of susbtance (drugs, alcohol).									Paying attention to detail, concentrating on something, slowly performing mundane actions or explaining something			5	2	2	0	4	6	0	2.71429	1	5		5	3	5	2	2	5	5	5	1	1	1
1		31	2	1	1	Tingles, for relaxation, and sometimes to help me sleep	1	1	1			3-4	3.5	4	1	Quiet room, no distractions.		1		1					Crisp sounds (tapping/crinkling)			5	3	5	3	1	2	0	2.71429	1	4		2	4	2	2	1	3	4	2	1	1	2
1		22	2	1	1	It makes me feel calm, more relaxed, it gives me tingles	1		1			one or two	1.5	4	2										Personal attention			3	6	3	4	2	2	0	2.85714	1	5		5	5	3	5	5	5	5	4	4	2	5
1		31	2	1	1	I watch it to experience tingles because it feels good and makes me feel relaxed. I also watch it to help me fall asleep.	1	1	1			3	3	5	1	I need to be in a quiet room by myself. I also noticed that if I am too stressed out or anxious, I will not be able to get tingles.		1		1					Crisp sounds (tapping/crinkling)			5	3	5	4	3	3	2	3.57143	1	5		4	4	5	5	1	3	3	2	1	1	1
1		52	2	1	1	To sleep, and to calm down. And of course, I enjoy the tingles!	1	1	1			1	1	5	1	I am not quite certain if I require specific conditions. But I think when I experience it naturally (not videos) it is when I am not too agitated. Again, I am not certain, I have not thought about it. Listening to videos I am usually in bed, it is quiet, and it is peaceful in the room.		1				1			Crisp sounds (tapping/crinkling)			6	4	6	5	4	1	0	3.71429	1	5		5	5	5	5	5	5	5	5	4	4	5
1		56	2	1	1	Tingles, relaxation	1		1			1-3	2	3	1	Quiet room, preferably dim lighting. Minimal sensory distractions.		1	1	1					Paying attention to detail, concentrating on something, slowly performing mundane actions or explaining something			4	5	4	3	4	6	0	3.71429	1	5		5	5	4	5	3	5	4	4	2	5	4
1		35	2	1	1	Ideally, for the tingling sensation, though I don't get that as much anymore (mainly because of tolerance but also I don't like a lot of the newer ASMR videos as much as the old ones). I still watch them though, since they're ideal as background viewing/listening. I always listen to when trying to relax or sleep. Sadly, they don't help me fall asleep, but at least I have some pleasant sounds to l…	1	1	1			I'll either put a playlist on loop before I go to bed (so that would be a lot of shorter videos) or, if it's a longer video or a really good video, I'll put that single video on endless repeat. So, it could be anything from 1 video to a long list of short videos. I just make sure that it's on a loop and enough to cover around 6 hours (which is when I set the sleep timer to switch my PC off).		5	2										Other	I experience all of the above triggers but the survey only allows the selection of one; i.e., I'd have ticked all the boxes if I could.		5	3	4	4	5	4	4	4.14286	1	5		4	3	1	3	4	2	4	1	1	2	1
1		23	2	1	1	relaxing, to fall asleep	1	1				2	2	5	1	quiet, softer sounds to relax		1							Role-plays (eg. visit to the hairdressers, spa, doctors)			2	3	4	6	2	6	0	3.28571	1	4		2	1	3	3	3	5	3	1	1	3	1
1		30	2	1	1	To experience the tingling sensation.			1			2-3	2.5	3	1	Quiet room, ability to focus peacefully and pay close attention.		1							Paying attention to detail, concentrating on something, slowly performing mundane actions or explaining something			1	5	1	5	0	6	0	2.57143	1	5		5	4	3	5	5	4	2	4	4	2	2
1		35	2	1	1	It’s enjoyable and helps to fall asleep		1	1			2	2	4	2										Crisp sounds (tapping/crinkling)			6	5	6	4	3	2	2	4	1	5		1	4	3	1	1	5	2	1	1	1	1
1		31	2	1	1	Tingles and relaxation.	1		1			1-2. Usually one long one is enough.	1.5	4	1	Generally I need to be in a quiet, private space and concentrating on the trigger(s).		1		1					Paying attention to detail, concentrating on something, slowly performing mundane actions or explaining something			4	4	3	5	5	6	3	4.28571	1	5		5	5	4	5	4	4	5	5	2	2	2
1		29	2	1	1	Mainly to experience the tingles and help me fall asleep. I also think that I am addicted to it now, and I need to watch videos every night.		1	1			1, but usually a long one (30-40 min)	1	5	2										Paying attention to detail, concentrating on something, slowly performing mundane actions or explaining something			1	3	4	4	2	6	2	3.14286	1	5		3	1	4	5	3	2	3	1	1	1	1
1		20	2	1	1	It really helps with a lot of aspects of my life. When I feel anxious it calms me down but most importantly I had insomnia and it has completely cured that. I no longer struggle to sleep at all.		1		1		2	2	5	2										Crisp sounds (tapping/crinkling)			6	3	5	1	5	5	0	3.57143	1	4		3	1	5	4	2	4	4	2	4	1	1
1		21	2	1	1	Relax and fall asleep	1	1				2	2	5	2										Hair brushing			2	6	6	6	5	4	0	4.14286	1	5		5	3	4	4	5	5	5	4	4	3	4
1		20	2	1	1	To relax/ help study	1				1	3	3	4	1	Quiet, dimly lit room		1	1						Crisp sounds (tapping/crinkling)			6	1	5	1	1	1	0	2.14286	1	5		3	4	3	5	4	5	5	3	4	3	4
1		20	2	1	1	I like the tingling sensation in my spine and sometimes I use them to fall asleep.		1	1			Depends on the day, but minimum 2 or 3	2.5	5	2										Other	It won’t let me select more than one so here’s the ones I experience: personal attention, whispering, role plays, hair brushing, crisp sounds		2	5	5	6	5	1	0	3.42857	1	5		3	5	4	3	3	3	4	4	3	2	2
1		20	1	1	1	I often use them to wind down before going to bed or to fall asleep if I am struggling to.	1	1				2 - 3	2.5	4	2										Other	All of the options other than people eating		5	3	4	2	4	3	0	3	1	4		4	5	4	3	2	4	4	3	2	2	3
1		20	2	1	1	To help me sleep, and to help me calm down when i feel anxious		1		1		1/2	1.5	5	1	Dark lighting and quiet		1	1						Crisp sounds (tapping/crinkling)			5	3	6	1	3	6	0	3.42857	1	4		3	5	5	4	5	5	5	3	2	2	4
2		30	2	1	1	Relax and fall asleep	1	1				3	3	4	1	Dimly lit or no light. Either very quiet room or with a bit of low white noise.		1	1						Other	Matchbox with matches, being shaken. Phoropter. "sk" sound. whispering in foreign languages I don't speak		4	3	4	4	0	5	0	2.85714	1	5		1	4	3	3	2	2	3	2	3	2	2
1		35	2	1	1	To relax, to elevate my mood, to become focused—I often leave videos on in the background while I work. They help me not to worry, by occupying the part of my brain that would be worrying with the video, so the rest of "me" can work.	1			1	1	1-3	2	5	2										Other	NOTE can't select multiples above! So writing them here. Please select all except the last two, paying attention to details and people eating. Those two do not work for me in ASMR videos but the rest do.		6	4	5	2	4	0	0	3	2	5		5	5	3	5	1	3	5	4	5	1	2
1		20	2	1	1	To relax and occupy mind, give it something to focus on when trying to sleep.	1	1				1	1	2	1	Usually listen to it with earphones in, when in bed.					1	1			Hair brushing			4	3	3	2	5	2	0	2.71429	1	4		3	1	5	4	3	5	5	3	4	2	1
1		24	2	1	1	I watch it to experience tingles, relax, calm down my anxiety, and to fall asleep.	1		1	1		2	2	5	2										Personal attention			6	5	3	4	6	3	1	4	1	4		2	3	2	1	1	4	1	1	2	1	2
1		32	2	1	1	to induce tingles before bed, but I often listen at work to relax and destress.	1					to depends if I experience tingles on the first one, if not i'll play several.	1	5	2										Crisp sounds (tapping/crinkling)			6	1	5	3	0	6	0	3	1	5		5	5	4	5	4	5	5	5	5	1	4
1		21	2	1	1	It makes me feel relaxed, and I become almost hypnotized towards those sorts of videos.	1					3	3	5	2										Paying attention to detail, concentrating on something, slowly performing mundane actions or explaining something			0	1	4	0	2	5	0	1.71429	1	4		5	4	5	5	4	3	4	4	3	1	4
2		22	2	1	1	To help relax me when I am stressed and to help me fall asleep.	1	1				1-2	1.5	3	1	Quiet room, comfortable setting (i.e. bedroom), low light levels.	1	1	1						Role-plays (eg. visit to the hairdressers, spa, doctors)			0	5	5	6	0	0	0	2.28571	1	5		4	1	3	1	5	4	5	4	1	1	4
1		24	2	1	1	To experience tingling, to reduce anxiety and tension			1	1		1-3	2	5	2										Other	Crisp sounds, personal attention, role-plays, attention to detail, and foreign accents (survey would not allow multiple choices)		3	6	1	5	4	6	0	3.57143	1	5		5	4	4	3	2	2	4	3	4	2	1
1		32	2	1	1	To relax and fall asleep, mostly. Sometimes to experience the satisfying nature of certain videos.	1	1	1			3	3	5	1	Concentration, with little distractions, so I can fully enjoy the experience.				1					Hair brushing			1	6	4	4	6	4	2	3.85714	1	5		5	5	4	5	3	4	4	2	4	3	2
1		17	2	1	1	usually to relax, mainly after exams.	1					about two or three	2.5	3	2										Crisp sounds (tapping/crinkling)			6	5	6	4	5	3	3	4.57143	1	5		5	5	4	5	3	4	5	5	5	3	4
1		19	2	1	1	Mainly relaxation but also just because it is pleasant and calming	1		1			5	5	4	2										Whispering			2	3	5	5	3	3	1	3.14286	1	4		4	2	5	5	4	3	5	1	4	3	1
1		37	2	1	1	To experience the tingles and to make me feel better			1	1		3	3	3	2										People eating			6	1	5	1	0	4	6	3.28571	1	1		4	2	2	2	2	5	5	2	2	4	4
1		25	2	1	1	To relax and fall asleep. They also help me to calm down sometimes when my anxiety gets bad.	1	1		1		any from 1-20 simply just trying to find the right video.	10.5	5	2										Role-plays (eg. visit to the hairdressers, spa, doctors)			3	4	2	6	6	4	0	3.57143	1	4		4	3	5	3	3	4	5	4	2	2	2
1		22	2	1	1	To help relieve anxiety, to rest my brain, to fall asleep if needed.		1		1		one, perhaps two	1.5	4	1	quiet, comfortable (usually laying down), warm enough but not too hot. No distractions (no loud housemates, phone buzzing etc), dim lighting to help me relax	1	1	1	1		1	1		Whispering			3	6	6	4	4	6	2	4.42857	1	5		5	5	5	5	4	4	5	5	4	2	4
1		61	2	1	1	Relaxation and to induce sleep	1	1				1 or 2	1.5	5	1	Quiet room and correct stimuli		1							Hair brushing			0	4	3	5	6	6	0	3.42857	1	5		4	5	5	4	3	4	5	5	4	3	3
1		21	1	1	1	Relaxation	1					4	4	3	2										Hair brushing			2	1	4	3	6	4	0	2.85714	1	4		4	2	5	4	3	4	5	2	2	3	3
1		18	2	1	1	It is to experience tingles and because the kindness and calmness of ASMRtists makes me feel less stressed	1		1			5	5	5	2										Crisp sounds (tapping/crinkling)			5	1	4	1	2	0	3	2.28571	1	5		2	4	5	2	3	2	5	2	1	1	1
1		29	2	1	1	Tingles, relieves stress, helps with my anxiety and I feel a sense of intimacy	1		1	1		4-5	4.5	5	1	Roleplays, I prefer whispering								1	Personal attention			6	6	6	6	5	2	0	4.42857	1	5		1	3	4	2	1	4	5	1	1	1	1
1		18	1	1	1	To relax and fall asleep	1	1				3-4	3.5	3	1	Quiet room, comfortable position	1	1							People eating			0	1	2	0	1	5	5	2	1	2		5	2	5	1	4	3	5	3	4	1	5
1		23	2	1	1	To relax if I’m stressed out, to help me get to sleep, to help me concentrate on something like coursework	1	1			1	Anywhere from 2-14	8	5	2										Other	All of the above		6	2	6	1	5	4	3	3.85714	1	5		5	2	5	2	1	2	4	4	1	2	4
1		21	2	1	1	To relax, and for the tingles!	1		1			5-7	6	4	1	Quiet, slightly colder room usually if watching videos, headphones usually mean my tingles are stronger. In real life it can take me by surprise- can sometimes be louder and usually happens when someone is explaining something to me.		1			1		1	1	Other	Wouldn’t let me tick multiple options. Personal attention,whispering, role-plays, paying attention to detail, people eating, gentle hand movements		0	5	6	5	1	6	4	3.85714	1	5		2	5	3	4	5	5	5	2	2	3	3
2		35	2	1	1	Experience the tingles.			1			1	1	2	1	Quietness.		1							Role-plays (eg. visit to the hairdressers, spa, doctors)			2	6	4	5	2	5	1	3.57143	1	5		5	3	5	5	4	3	3	4	4	3	5
1		17	2	1	1	Relax	1					1	1	4	2										Crisp sounds (tapping/crinkling)			6	0	0	0	3	0	0	1.28571	2	4		5	5	5	1	2	3	5	2	1	1	1
2		28	2	1	1	I primarily listen to asmr while falling asleep, but also while I study or write.		1			1	I usually do about an hour's worth.		5	1	quietness is the primary constraint, but any time i feel relaxed, i can achieve asmr.		1							Other	The question wouldn't allow multiple responses, but my top triggers are things like sand cutting, crinkling, tapping, page turning, head massage, ear eating, and mouth sounds.		6	2	4	2	5	3	0	3.14286	1	4		2	3	1	4	1	1	3	1	1	1	1
1		28	2	1	1	Relax and fall asleep I have depression and anxiety	1	1				5	5	5	2										Hair brushing			5	6	6	5	6	2	0	4.28571	1	5		5	3	5	2	2	1	2	2	2	2	4
1		31	2	1	1	Tingles and to become sleepy		1	1			4	4	3	1	Quiet environment, calmness		1							Whispering			0	4	6	4	4	4	4	3.71429	1	4		3	5	4	2	2	3	5	2	2	2	3
1		33	2	1	1	Tingles, relaxation	1		1			1	1	4	2										Whispering			2	6	6	2	2	1	0	2.71429	1	4		2	1	5	4	1	4	5	4	1	1	1
2		33	2	1	1	Sleep when I am anxious		1		1		Autoplay till I fall asleep		2	1	Quiet, gentle whispering		1							Whispering			2	4	6	1	1	1	0	2.14286	1	4		3	5	3	3	3	3	4	2	5	2	5
2		19	2	1	1	It’s helps me relax when I get anxiety.	1			1		2-3. Depends length and quality	2.5	4	1	I need to be in a dark room, not disturbed.			1	1					Other	I get ASMR visually. So staring and slow moving objects, lights shining across my eyes, etc.		3	4	4	1	1	5	4	3.14286	1	4		4	4	4	5	4	3	4	4	3	4	3
2		33	2	1	1	Tingles and relax.	1		1			1 to 3	2	5	2										Other	Crisp sounds, Personal attention, Whispering, Role-plays, Hair brushing (your survey only allows me to select 1 option)		4	6	6	6	5	3	3	4.71429	1	5		4	4	3	2	2	4	4	2	2	3	2
1		28	2	1	1	To sleep.		1				1	1	5	2										Whispering			4	0	6	0	2	5	0	2.42857	1	4		5	5	5	5	5	3	5	5	5	3	4
1		21	2	1	1	Tingles and sleep and relaxation	1	1	1			2	2	4	1	Quiet room		1							Personal attention			1	6	6	6	5	5	0	4.14286	1	5		5	5	3	5	3	3	3	1	1	4	2
1		18	2	1	1	Fall asleep, tingles ( I feel the tingles as I'm thinking about it )pleasurable		1	1			1	1	5	2										Crisp sounds (tapping/crinkling)			6	3	4	2	2	2	5	3.42857	1	5		4	4	3	4	3	3	3	4	4	2	4
1		24	2	1	1	Fall asleep		1				1-3	2.5	4	1	Quiet room, low lighting		1	1						Whispering			5	0	6	0	5	2	4	3.14286	1	4		3	4	3	4	1	3	3	5	1	1	1
1		19	2	1	1	Sometimes it helps me relaxed. The ASMR sensation is also a new experience that can feel a bit ovrewhelming but also very pleasing	1		1			2	2	2	2										Whispering			4	0	6	1	3	0	0	2	2	4		5	5	5	5	5	2	2	1	4	1	1
1		28	2	1	1	I use them to relax, unwind, and to fall asleep.	1	1				2	2	5	2										Role-plays (eg. visit to the hairdressers, spa, doctors)			5	6	3	6	4	5	0	4.14286	1	5		5	3	4	4	5	4	4	5	5	1	4
1		21	2	1	1	Relaxation, Falling asleep	1	1				1 to 3	2	5	1	a slightly cold room temperature							1		Role-plays (eg. visit to the hairdressers, spa, doctors)			1	6	5	6	4	3	1	3.71429	1	5		3	2	2	1	2	5	5	2	1	3	3
1		19	1	1	1	To fall asleep		1				3-5	4	5	1	Quiet, dimmed lights, little other noise		1	1						Personal attention			0	6	6	6	3	6	0	3.85714	1	5		4	4	5	5	2	3	5	4	3	3	3
1		18	1	1	1	Helps me relax in some ways	1					1-2	1.5	2	2										People eating			5	0	0	0	0	3	5	1.85714	1	3		2	2	3	5	2	4	5	3	3	4	5
1		19	1	1	1	To relax before I fall asleep or have experienced a stressful situation or day and need to calm down	1			1		2	2	3	1	Good quality had phones, somewhere to lie down, and a peaceful environment		1			1	1			Crisp sounds (tapping/crinkling)			6	1	5	2	4	0	3	3	1	5		2	4	4	1	1	3	3	1	1	2	1
1		21	1	1	1	I watch ASMR videos to de-stress	1					Approximately 5-10	7.5	3	2										People eating			3	4	5	2	1	0	6	3	1	4		3	4	5	4	2	4	3	2	4	1	1
2		30	2	1	1	Experience the tingles			1			4-5	4.5	3	2										Paying attention to detail, concentrating on something, slowly performing mundane actions or explaining something			3	5	1	1	3	5	0	2.57143	1	5		3	4	1	2	1	3	1	1	1	1	1
3	nonbinary	19	1	1	1	find it relaxing, sometimes they are just enjoyable to watch/experience	1		1			5-7	6	3	1	quiet room, little or no distractions		1		1					Crisp sounds (tapping/crinkling)			5	4	1	1	0	3	5	2.71429	1	4		3	5	5	4	4	5	5	5	5	5	5
1		19	1	1	1	Fall asleep		1				2	2	2	2										Crisp sounds (tapping/crinkling)			4	1	4	0	0	0	0	1.28571	1	4		3	4	4	3	2	4	4	4	4	2	4
1		18	1	1	1	The sounds they make are satisfying.			1			6	6	3	1	headphones or alone in a quiet room		1		1	1				People eating			4	4	4	4	3	4	5	4	1	4		4	4	2	4	2	3	3	4	3	4	3
2		23	2	1	1	to get tingles, relax and fall asleep	1	1	1			i watch it nearly 24h/ day, even when i'm asleep		5	2										Whispering			4	2	6	2	4	5	6	4.14286	1	5		5	4	2	4	5	1	5	5	5	5	5
1		18	1	1	1	relax	1					8	8	5	2										People eating			6	1	1	1	1	1	6	2.42857	1	5		2	2	5	4	4	4	4	4	2	2	2
1		19	1	1	1	Goosebumps and a sense of relaxation. Transfixion.	1		1			3	3	3	2										Whispering			5	0	5	3	0	4	0	2.42857	1	4		5	5	5	4	4	5	5	5	5	5	3
1		19	1	1	1	To help me relax, especially if I'm finding it difficult to fall asleep	1	1				2	2	4	1	dark room with no background noise			1						Whispering			4	5	6	1	3	2	5	3.71429	1	5		3	3	4	3	4	5	4	2	3	3	2
1		19	1	1	1	They relax me as they are satisfying to watch and listen to and they help relieve stress.	1					7	7	4	2										Crisp sounds (tapping/crinkling)			6	2	3	6	4	1	0	3.14286	1	4		4	2	4	4	3	5	4	4	4	2	4
1		19	1	1	1	To relax and feel the tingles.	1		1			3	3	4	1	In bed at night time.						1			Whispering			3	4	5	4	5	5	5	4.42857	1	4		3	3	2	4	3	4	3	4	4	3	3
1		19	1	1	1	it is relaxing and satisfying	1		1			7	7	4	2										Paying attention to detail, concentrating on something, slowly performing mundane actions or explaining something			5	4	0	2	5	5	0	3	2	5		4	4	4	4	2	4	4	3	2	1	4
1		26	2	1	1	I watch ASMR videos for a number of reasons - Sometimes to help anxiety or to fall asleep. Other times purely for the tingles but what I use ASMR for most is concentration, I play it in the background whilst I go about my work and it actually helps me to stay focused as I struggle with my attention span. There are different types of ASMR videos that I watch for each of these purposes that I use A…		1	1	1	1	Anywhere from five to 20. (auto play on youtube)	12.5	5	2										Crisp sounds (tapping/crinkling)			6	3	4	3	3	3	4	3.71429	1	5		5	5	5	5	5	3	5	4	4	3	4
2		22	2	1	1	I usually watch ASMR videos to relax. Sometimes I use it as a medium to sleep, but I don't do it too often, because of a certain habituation that reduces tingles.	1	1				30min to 1 hour		4	2										Crisp sounds (tapping/crinkling)			6	2	4	0	4	4	6	3.71429	1	5		3	5	1	2	5	3	4	4	4	1	1
1		19	1	1	1	Relaxes me and relieves stress	1					1	1	2	2										Paying attention to detail, concentrating on something, slowly performing mundane actions or explaining something			3	1	0	0	0	6	0	1.42857	2	4		1	4	4	1	1	4	3	1	4	1	1
2		24	2	1	1	Fall asleep/de-stress.	1	1				2 or 1 long one (45 minutes+)	1.5	3	1	Lights off, dark room, open so I can hear the traffic and then listen to the video with my eyes closed.			1						Whispering			0	2	6	5	2	0	0	2.14286	1	4		1	1	5	1	4	4	5	1	3	1	4
1		20	1	1	1	Relaxing content and fall asleep	1	1				3	3	3	2										Paying attention to detail, concentrating on something, slowly performing mundane actions or explaining something			6	0	5	0	2	4	0	2.42857	2	4		1	4	3	1	1	3	2	1	4	5	3
1		21	2	1	1	I enjoy them			1			3/4	3.5	3	2										Hair brushing			4	0	0	0	4	0	2	1.42857	1	3		2	1	1	3	3	3	2	1	1	1	1
							104	86	79	23	10		3.3007		0.489933		6	52	22	19	15	10	9	6				3.57047	3.65772	4.03356	3.15436	3.04698	3.43624	1.34228
							70.27	58.12	53.38	15.54	6.76						8.22	71.23	30.14	26.03	20.55	9.59	12.33	8.22
[truncated: 53 more columns]

## Sheet: RAW
1. Do you consent to take part in this study?	2. What is your gender?	2.a. If you selected Other, please specify:	3. What is your age?	4. Do you attend Bath Spa University?	5. Having read the description would you say you ever experience ASMR whether it is from watching such videos or in everyday life? Would you classify yourself as somebody who experiences ASMR?	6. Do you watch ASMR videos?	7. Why do you watch ASMR videos? Is it to experience the tingles, relax, fall asleep? Please specify.	8. How many ASMR videos do you typically watch in a single session?	9. How often do you watch ASMR videos?	10. Do you require specific conditions to achieve ASMR?	11. Please briefly describe the conditions you require to achieve ASMR sensations (eg. busy, quiet room, bright lighting etc.	12. Please indicate whether or not these common stimuli trigger your ASMR - please select all the items that trigger your tingling sensations while viewing ASMR videos in your daily life.	12.a. If you selected Other, please specify:	13. Please indicate how intense the ASMR experience is on average when engaging with those stimuli. Intensity Scale (higher numbers represent increasing intensity): 0 = No Tingles 1 2 3 = Moderately Intense 4 5 6 = Most Intense ASMR Experience For example, if whispering triggers the most intense tingles for someone, they would label that stimulus a "6".	13.1. Crisp sounds (tapping/crinkling)	13.2. Personal attention	13.3. Whispering	13.4. Role-plays (eg. visit to hairdresser, spa, doctor)	13.5. Hair brushing	13.6. Paying attention to detail, concentrating on something, slowly performing mundane actions or explaining something	13.7. People eating	14. Does the intensity of these tingles vary from session to session of ASMR video viewing?	15. On average, how pleasurable is the ASMR experience?	16. Please select the degree to which you agree with the following statements on a sale of 1 (Disagree Strongly) – 5 (Agree Strongly).	16.1. Sometimes I feel and experience things as I did when I was child.	16.2. I can be greatly moved by eloquent or poetic language.	16.3. While watching a movie, TV show or a play, I may become so involved that I may forget about myself and my surrounding and experience the story as if it were real and as if I were taking part in it.	16.4. If I stare at a picture and then look away from it, I can sometime “see” an image of the picture almost as I were still looking at it.	16.5. Sometimes I feel as if my mind could envelop the whole world.	16.6. I like to watch cloud shapes change in the sky.	16.7. If I wish, I can imagine (or daydream) some things so vividly that they hold my attention as a good movie or story does.	16.8. I think I really know what some people mean when they talk about mystical experiences.	16.9. I sometimes “step outside” my usual self and experience an entirely different state of being.	16.10. Textures – such as wool, sand, wood – sometimes remind me of colours or music.	16.11. Sometimes I experience thing as if they were doubly real.	16.12. When I listen to music I can get so caught up in it that I don’t notice anything else.	16.13. If I wish, I can imagine that my body is so heavy that I could not move it.	16.14. I can often somehow sense the presence of another person before I actually see or hear them.	16.15. The crackle and flames of a wood fire stimulate my imagination.	16.16. It is sometimes possible for me to be completely immersed in nature or in art and to feel as if my whole state of consciousness has somehow been temporarily altered.	16.17. Different colours have distinctive and special meanings for me.	16.18. I am able to wander off into thoughts while doing a routine task and actually forget that I am doing the task, and then find a few minutes later than I have completed it.	16.19. I can sometimes recollect certain past experiences in my life with such clarity and vividness that is like living them again or almost so.	16.20. Things that might seem meaningless to others often make sense to me.	16.21. While acting a play I think I could really feel the emotions of the character and “become” her/him for the time being, forgetting both myself and the audience.	16.22. My thoughts often don’t occur as words but as visual images.	16.23. I often take delight in small things (such as the colours in soap bubbles).	16.24. When listening to organ music or other powerful music I sometimes feel as if I am being lifted into the air.	16.25. Sometimes I can change noise into music by the way I listen to it.
Yes	Male		19	No	No																				4	3	2	2	2	4	3	3	2	3	3	4	2	2	4	3	3	3	3	4	3	4	4	4	2
Yes	Male		30	No	Yes	Yes	Relax and fall asleep	3	2-3 times a week	Yes	Dimly lit or no light. Either very quiet room or with a bit of low white noise.	Other	Matchbox with matches, being shaken. Phoropter. "sk" sound. whispering in foreign languages I don't speak		4	3	4	4	0	5	0	Yes	Quite pleasurable		1	4	3	3	2	2	3	2	3	2	2	4	1	2	3	3	3	4	4	4	3	3	4	4	4
Yes	Female		17	No	Yes	Yes	usually to relax, mainly after exams.	about two or three	2-3 times a month	No		Crisp sounds (tapping/crinkling)			6	5	6	4	5	3	3	Yes	Quite pleasurable		5	5	4	5	3	4	5	5	5	3	4	5	4	5	5	3	4	3	4	4	4	3	4	4	2
Yes	Male		21	No	No																				3	4	1	2	3	1	2	2	2	1	3	4	1	1	2	2	2	2	4	4	1	3	3	1	2
Yes	Female		25	No	Yes	Yes	Both for tingles and help with falling asleep.	2-3	Daily	Yes	A quiet room.	Crisp sounds (tapping/crinkling)			5	2	0	2	5	4	3	Yes	Mildly pleasurable		5	2	2	5	1	3	5	2	1	2	1	2	1	1	2	2	5	4	2	3	1	3	3	1	1
Yes	Female		27	Yes	No																				1	2	1	1	1	2	1	1	1	1	1	2	1	1	1	2	3	1	2	3	1	3	4	5	3
Yes	Female		34	No	Yes	Yes	Experience tingles, relax or re-focus my mind when stressed, helps me sleep when stressed or not tired	1-5	2-3 times a week	Yes	Quiet space with little or no distractions.	Paying attention to detail, concentrating on something, slowly performing mundane actions or explaining something			1	5	4	3	2	6	0	Yes	Quite pleasurable		3	3	3	3	1	2	5	1	1	1	1	4	1	3	3	2	4	3	3	3	2	4	2	1	1
Yes	Female		20	No	Yes	Yes	Helps me to relax and fall asleep	2	2-3 times a month	Yes	Peace and quiet and if the people in the videos have soothing voices and aren’t loud and quick with their movements	Whispering			5	2	6	2	5	5	0	No	Quite pleasurable		5	2	2	2	1	4	2	2	1	2	4	4	4	3	2	3	2	5	4	4	1	4	4	1	2
Yes	Female		19	Yes	No																				2	2	4	4	2	3	3	1	2	1	3	5	2	1	2	3	1	4	3	1	4	4	3	2	4
Yes	Female		21	No	No																				4	4	2	4	2	4	2	3	2	1	1	5	5	5	2	1	3	4	4	4	2	2	1	2	4
Yes	Other	Genderfluid - mostly F	26	No	Yes	Yes	To help me fall asleep	5	Daily	Yes	nothing touching my head, close attention, concentration, sometimes learning factors (like a teacher rp or survey being taken)	Paying attention to detail, concentrating on something, slowly performing mundane actions or explaining something			1	1	1	2	1	3	1	Yes	Mildly pleasurable		3	5	5	5	4	5	4	4	5	4	4	3	3	4	4	4	4	4	3	3	4	4	5	3	4
Yes	Female		22	No	Yes	Yes	To help relieve anxiety, to rest my brain, to fall asleep if needed.	one, perhaps two	2-3 times a week	Yes	quiet, comfortable (usually laying down), warm enough but not too hot. No distractions (no loud housemates, phone buzzing etc), dim lighting to help me relax	Whispering			3	6	6	4	4	6	2	Yes	Quite pleasurable		5	5	5	5	4	4	5	5	4	2	4	4	4	5	4	4	3	4	4	5	3	5	5	3	5
Yes	Female		21	No	Yes	No				No		Crisp sounds (tapping/crinkling)			6	2	1	1	4	4	1	Yes	Mildly uncomfortable		3	3	4	4	3	4	5	3	3	2	3	4	1	4	1	2	4	2	1	4	3	4	4	1	4
Yes	Female		24	Yes	No																				3	2	2	2	2	1	1	1	1	1	1	2	1	1	1	1	1	1	2	2	2	1	2	1	1
Yes	Female		32	No	Yes	Yes	To relax and fall asleep, mostly. Sometimes to experience the satisfying nature of certain videos.	3	Daily	Yes	Concentration, with little distractions, so I can fully enjoy the experience.	Hair brushing			1	6	4	4	6	4	2	Yes	Quite pleasurable		5	5	4	5	3	4	4	2	4	3	2	3	4	4	5	5	4	5	5	4	3	3	5	4	5
Yes	Female		20	Yes	Yes	No				Yes	Not too bright lighting, usually loud live music or a play, ballet etc	Other	Stereotypically awe inspiring situations for example an orchestra or an emotional scene in a film or play		0	2	3	1	2	2	0	Yes	Mildly pleasurable		2	5	4	1	2	4	4	2	2	3	2	4	2	2	4	4	4	5	3	4	3	2	4	5	4
Yes	Male		58	No	Yes	No				No		Other	I am Type A		0	0	0	0	0	0	0	No	Quite pleasurable		1	1	1	1	5	1	1	5	5	1	5	1	1	5	3	3	1	1	3	3	1	1	3	3	3
Yes	Female		20	Yes	No																				2	1	3	2	2	3	4	2	4	3	2	2	2	3	2	3	2	3	2	3	3	2	4	2	3
Yes	Female		28	No	Yes	Yes	Mainly to relax and sleep, I only sometimes get full on tingles but still usually get a physically relaxed feeling from the videos	5	Daily	No		Crisp sounds (tapping/crinkling)			6	3	2	0	1	0	0	Yes	Mildly pleasurable		2	4	2	1	1	2	3	1	1	1	1	2	1	3	2	1	1	2	1	3	2	2	4	1	1
Yes	Female		20	Yes	No																				2	4	5	2	2	4	4	2	5	1	1	5	5	4	5	2	1	4	4	5	2	2	1	4	4
Yes	Female		18	Yes	Yes	No				No		Whispering			5	2	6	1	0	0	1	No	Mildly uncomfortable		2	5	4	2	4	4	5	4	1	4	3	4	1	4	4	4	4	3	4	4	2	3	4	4	2
Yes	Male		22	No	Yes	Yes	I usually watch ASMR videos to relax. Sometimes I use it as a medium to sleep, but I don't do it too often, because of a certain habituation that reduces tingles.	30min to 1 hour	2-3 times a week	No		Crisp sounds (tapping/crinkling)			6	2	4	0	4	4	6	Yes	Quite pleasurable		3	5	1	2	5	3	4	4	4	1	1	3	2	2	5	5	2	3	4	4	2	3	4	2	2
Yes	Female		23	No	Yes	Yes	To relax if I’m stressed out, to help me get to sleep, to help me concentrate on something like coursework	Anywhere from 2-14	Daily	No		Other	All of the above		6	2	6	1	5	4	3	Yes	Quite pleasurable		5	2	5	2	1	2	4	4	1	2	4	5	2	4	5	5	5	4	3	3	2	2	4	3	2
Yes	Female		19	Yes	No																				2	3	5	2	1	1	3	2	2	2	3	5	2	2	1	1	4	3	4	3	5	3	2	2	3
Yes	Female		20	Yes	No																				3	1	3	2	2	2	3	2	1	1	1	1	1	1	1	1	1	2	3	2	1	1	1	1	1
Yes	Female		58	No	Yes	No				Yes	It is me, not the environment that is the trigger. I let my eyes begin by focusing past objects on to a distant converging point. Not looking at anything but past them.	Paying attention to detail, concentrating on something, slowly performing mundane actions or explaining something			0	0	0	0	3	6	0	No	Quite pleasurable		5	5	4	5	5	5	5	5	5	5	3	4	3	3	4	5	5	5	5	5	5	5	5	4	5
Yes	Female		32	No	Yes	Yes	Tingles and to fall asleep	2-3	Daily	Yes	Dark, quiet room with headphones	Role-plays (eg. visit to the hairdressers, spa, doctors)			5	6	2	6	6	0	0	Yes	Quite pleasurable		4	5	5	2	4	5	5	5	2	1	1	5	1	5	1	3	2	5	5	5	5	5	5	1	5
Yes	Female		19	Yes	No																				4	5	5	4	3	5	5	2	3	1	4	5	1	4	3	3	5	5	5	3	1	4	5	3	5
Yes	Female		25	No	No																				5	5	4	4	4	4	5	4	5	2	5	5	2	2	4	4	4	2	4	4	2	1	5	5	2
Yes	Male		21	No	No																				5	4	3	4	3	5	5	5	4	4	5	5	2	5	4	5	5	4	5	4	2	3	4	3	3
Yes	Male		25	No	No																				3	1	3	1	1	4	4	1	1	1	3	3	2	3	1	5	2	4	3	3	3	1	3	1	1
Yes	Male		22	Yes	Yes	No				Yes	Quiet room so I can focus on sounds. As little distractions as possible.	Personal attention			4	6	5	2	1	5	0	Yes	Mildly pleasurable		2	5	4	4	2	4	5	2	2	4	2	5	5	4	5	4	5	4	5	5	5	2	4	4	2
Yes	Female		21	No	No																				2	4	1	3	3	4	2	2	3	2	3	5	1	4	4	3	2	4	4	4	1	2	3	3	2
Yes	Female		19	Yes	Yes	Yes	To relax before I fall asleep or have experienced a stressful situation or day and need to calm down	2	2-3 times a month	Yes	Good quality had phones, somewhere to lie down, and a peaceful environment	Crisp sounds (tapping/crinkling)			6	1	5	2	4	0	3	Yes	Quite pleasurable		2	4	4	1	1	3	3	1	1	2	1	2	1	4	4	1	2	2	3	4	2	2	3	4	5
Yes	Male		22	No	Yes	Yes	To help relax me when I am stressed and to help me fall asleep.	1-2	2-3 times a month	Yes	Quiet room, comfortable setting (i.e. bedroom), low light levels.	Role-plays (eg. visit to the hairdressers, spa, doctors)			0	5	5	6	0	0	0	Yes	Quite pleasurable		4	1	3	1	5	4	5	4	1	1	4	2	1	1	1	1	1	1	5	5	1	5	1	4	1
Yes	Female		22	No	Yes	Yes	I watch asmr to feel tingles and to go to sleep	2	Daily	No		People eating			5	6	6	5	5	4	4	Yes	Mildly pleasurable		5	4	4	3	3	4	5	2	3	5	4	5	5	3	4	3	5	5	5	4	5	4	4	4	5
Yes	Male		23	No	No																				2	2	3	3	4	3	3	4	3	1	2	4	1	1	2	3	3	4	3	4	2	3	4	2	3
Yes	Male		20	No	No																				1	2	4	4	4	1	4	5	5	4	3	2	4	2	4	5	2	4	1	3	4	1	1	5	5
Yes	Female		34	No	Yes	Yes	The tingles and relaxation	2 or 3	2-3 times a week	Yes	Normally, I ned a quiet place, however I sometimes get tingles in a busy enviroment.	Other	People biting nails, hair being cut, scratching specific fabrics, soap being cut, people eating		3	2	2	3	6	6	6	Yes	Quite pleasurable		5	3	2	5	2	3	5	4	3	2	4	3	2	1	4	5	5	5	4	4	1	5	5	5	3
Yes	Female		20	Yes	Yes	No				No		Whispering			4	0	5	0	4	0	2	Yes	Mildly pleasurable		4	3	2	1	1	1	1	2	2	1	1	2	1	3	2	1	1	3	1	2	1	2	1	1	1
Yes	Female		19	No	Yes	Yes	Mainly relaxation but also just because it is pleasant and calming	5	2-3 times a week	No		Whispering			2	3	5	5	3	3	1	Yes	Mildly pleasurable		4	2	5	5	4	3	5	1	4	3	1	5	1	4	5	5	4	5	3	4	1	3	5	4	4
Yes	Female		19	Yes	No																				4	2	4	4	3	4	4	4	2	2	3	4	4	4	3	4	4	5	4	4	5	4	4	2	2
Yes	Female		23	No	Yes	Yes	To experience tingles and help me get tired if it’s bedtime and I’m not feeling ready for bed.	Many but I don’t sit and watch full videos, I skip through and watch parts of each one. Maybe 10-15.	2-3 times a week	No		Personal attention			4	6	6	5	3	6	0	Yes	Quite pleasurable		2	1	1	2	2	1	5	1	1	1	2	5	1	3	4	1	1	1	2	4	4	2	3	1	1
Yes	Female		21	No	Yes	Yes	To relax and tune out of my thoughts for a while	3	2-3 times a week	No		Crisp sounds (tapping/crinkling)			6	2	3	3	0	4	4	Yes	Mildly pleasurable		3	5	5	2	2	2	5	4	5	3	2	3	1	4	5	5	4	4	3	4	2	2	4	4	2
Yes	Female		20	No	Yes	Yes	To help me sleep, and to help me calm down when i feel anxious	1/2	Daily	Yes	Dark lighting and quiet	Crisp sounds (tapping/crinkling)			5	3	6	1	3	6	0	Yes	Mildly pleasurable		3	5	5	4	5	5	5	3	2	2	4	5	3	5	5	3	2	5	4	5	5	4	5	5	5
Yes	Female		29	No	Yes	Yes	Tingles, relieves stress, helps with my anxiety and I feel a sense of intimacy	4-5	Daily	Yes	Roleplays, I prefer whispering	Personal attention			6	6	6	6	5	2	0	Yes	Quite pleasurable		1	3	4	2	1	4	5	1	1	1	1	5	2	4	3	1	1	4	1	1	2	1	2	4	1
Yes	Female		21	Yes	No																				1	2	5	2	2	4	4	1	1	1	1	1	1	3	4	1	2	4	2	4	3	1	4	2	4
Yes	Male		34	No	No																				4	4	4	4	1	3	4	1	1	1	1	3	1	1	5	1	4	5	3	5	4	4	5	1	4
Yes	Female		21	Yes	No																				2	5	5	1	2	3	3	3	2	1	1	3	3	2	2	5	4	5	1	4	3	2	4	4	2
Yes	Female		29	No	No																				1	1	3	1	1	1	5	1	1	1	1	4	1	1	1	1	1	5	3	3	2	4	2	3	2
Yes	Male		21	No	Yes	No				No		Whispering			1	2	4	1	2	3	0	Yes	Mildly pleasurable		5	4	5	5	3	1	5	5	5	4	2	5	1	3	2	5	3	1	3	4	3	5	2	3	3
Yes	Female		21	No	Yes	Yes	Relaxation, Falling asleep	1 to 3	Daily	Yes	a slightly cold room temperature	Role-plays (eg. visit to the hairdressers, spa, doctors)			1	6	5	6	4	3	1	Yes	Quite pleasurable		3	2	2	1	2	5	5	2	1	3	3	5	1	2	4	5	4	5	2	3	3	4	4	5	1
Yes	Female		57	No	No																				4	5	3	4	2	4	2	4	2	1	1	3	2	2	4	2	1	4	5	4	2	1	4	4	3
Yes	Male		20	No	No																				2	4	3	1	1	4	5	1	1	1	1	1	2	1	3	5	2	2	4	5	4	5	5	2	4
Yes	Female		19	Yes	Yes	Yes	Fall asleep	2	Less than once a month	No		Crisp sounds (tapping/crinkling)			4	1	4	0	0	0	0	Yes	Mildly pleasurable		3	4	4	3	2	4	4	4	4	2	4	3	4	4	4	3	2	4	4	4	4	3	2	1	2
Yes	Female		28	No	Yes	Yes	I watch for the tingles before bed. I also listen to ASMR videos/Spotify at work to keep my stress down and better focus on work. Finally I also watch when I feel lonely or anxious and need something calming.	3-6	Daily	Yes	At work, I listen to audio triggers because I can still get the sensations without having to be visually distracted from my tasks. When in bed, darkness is best	Hair brushing			5	5	3	3	6	2	0	Yes	Quite pleasurable		5	4	4	3	3	4	3	3	3	1	2	4	3	3	4	4	4	4	2	3	3	2	5	5	4
Yes	Female		20	Yes	No																				4	1	3	4	1	1	2	1	2	1	4	3	1	1	1	1	2	4	3	3	2	1	4	1	1
Yes	Male		23	No	No																				1	3	4	2	1	4	5	1	1	1	1	2	1	4	1	1	1	1	1	1	1	1	1	1	1
Yes	Female		28	No	Yes	Yes	I use them to relax, unwind, and to fall asleep.	2	Daily	No		Role-plays (eg. visit to the hairdressers, spa, doctors)			5	6	3	6	4	5	0	Yes	Quite pleasurable		5	3	4	4	5	4	4	5	5	1	4	2	5	5	5	5	2	4	3	4	4	5	4	3	4
Yes	Female		21	No	Yes	Yes	Relax and fall asleep	2	Daily	No		Hair brushing			2	6	6	6	5	4	0	Yes	Quite pleasurable		5	3	4	4	5	5	5	4	4	3	4	4	5	4	4	5	4	4	4	4	4	4	5	2	2
Yes	Male		21	No	No																				3	4	3	3	3	4	5	4	4	2	4	3	2	5	4	4	5	4	5	4	3	4	2	2	2
Yes	Female		29	No	Yes	Yes	I enjoy the tingling sensation, and it relaxes me and helps me fall asleep.	2	2-3 times a week	Yes	if I'm watching videos, I need to be alone in a quiet room (preferably dark) and be wearing headphones.	Whispering			2	4	6	4	0	4	0	Yes	Quite pleasurable		4	5	4	3	2	4	4	4	2	1	2	4	1	2	3	4	1	5	3	4	4	3	3	2	1
Yes	Male		21	Yes	No																				2	4	2	4	1	4	4	2	2	1	1	2	2	1	3	3	1	4	2	1	2	3	4	1	4
Yes	Male		24	No	Yes	Yes	Fall asleep/de-stress.	2 or 1 long one (45 minutes+)	2-3 times a month	Yes	Lights off, dark room, open so I can hear the traffic and then listen to the video with my eyes closed.	Whispering			0	2	6	5	2	0	0	Yes	Mildly pleasurable		1	1	5	1	4	4	5	1	3	1	4	4	1	4	2	2	2	5	5	3	1	3	1	1	2
Yes	Female		63	No	Yes	No				No		Other	I experience it on command, not in relation to external stimuli.		0	0	0	0	0	0	0	No	Quite pleasurable		1	2	1	1	1	2	1	3	1	1	1	2	1	3	3	4	5	4	2	3	1	4	3	1	1
Yes	Female		30	No	Yes	Yes	To relax, and for the tingles.	3	2-3 times a week	Yes	Quiet room, not too warm.	Role-plays (eg. visit to the hairdressers, spa, doctors)			3	4	5	6	6	3	0	Yes	Quite pleasurable		3	4	4	4	2	4	4	3	2	3	3	2	2	2	4	3	4	2	4	2	2	3	4	3	4
Yes	Male		38	No	Yes	Yes	Mostly for relaxation (to sleep) or to relieve anxiety.	10	2-3 times a week	No		Whispering			0	5	6	4	5	5	0	Yes	Quite pleasurable		3	2	4	2	1	4	4	1	1	1	1	5	1	5	4	5	2	4	3	5	3	4	3	2	4
Yes	Female		35	No	Yes	Yes	To relax, to elevate my mood, to become focused—I often leave videos on in the background while I work. They help me not to worry, by occupying the part of my brain that would be worrying with the video, so the rest of "me" can work.	1-3	Daily	No		Other	NOTE can't select multiples above! So writing them here. Please select all except the last two, paying attention to details and people eating. Those two do not work for me in ASMR videos but the rest do.		6	4	5	2	4	0	0	No	Quite pleasurable		5	5	3	5	1	3	5	4	5	1	2	1	2	1	4	5	1	3	4	1	4	2	4	1	1
Yes	Male		21	No	No																				2	2	1	1	2	4	2	2	1	1	1	2	2	1	1	1	2	1	1	3	1	5	1	1	1
Yes	Other	nonbinary	19	Yes	Yes	Yes	find it relaxing, sometimes they are just enjoyable to watch/experience	5-7	2-3 times a month	Yes	quiet room, little or no distractions	Crisp sounds (tapping/crinkling)			5	4	1	1	0	3	5	Yes	Mildly pleasurable		3	5	5	4	4	5	5	5	5	5	5	5	3	5	4	5	5	5	4	4	5	5	5	5	4
Yes	Male		19	No	Yes	No				No		Crisp sounds (tapping/crinkling)			4	1	2	0	3	0	1	No	Mildly pleasurable		3	2	2	4	1	2	4	2	1	1	1	4	1	3	3	2	2	4	5	3	5	4	1	1	2
Yes	Female		23	No	Yes	Yes	I suffer from major depressive disorder and ASMR is the only thing I find myself somewhat relieved. I experience tingles, I always have but I think ASMR became more than tingles for me. I would consider myself addicted if I knew that these videos have a bad effect on me.	5	Daily	No		Personal attention			2	6	4	2	2	2	1	Yes	Quite pleasurable		4	4	5	4	5	4	5	5	5	5	4	5	3	4	3	3	5	5	5	4	4	5	5	4	5
Yes	Female		19	Yes	No																				2	4	2	1	2	3	1	3	3	1	3	4	2	3	2	3	3	4	4	3	4	3	3	1	1
Yes	Female		21	No	No																				3	4	3	2	2	2	4	3	2	1	2	5	4	4	2	2	2	4	3	4	2	1	2	2	2
Yes	Female		20	Yes	No																				1	4	2	2	2	4	5	2	1	1	1	5	3	5	2	2	3	2	2	5	1	2	4	1	4
Yes	Female		27	Yes	No																				1	5	5	1	3	4	3	5	1	5	1	5	1	1	5	3	3	3	1	5	3	1	1	1	1
Yes	Male		28	No	No																				3	5	2	5	1	2	2	2	1	1	1	3	3	2	3	3	3	4	3	2	3	3	3	4	4
Yes	Female		20	Yes	No																				4	5	3	5	2	5	2	2	1	1	2	4	1	4	4	2	2	5	1	3	2	1	4	4	2
Yes	Female		18	Yes	Yes	Yes	The sounds they make are satisfying.	6	2-3 times a month	Yes	headphones or alone in a quiet room	People eating			4	4	4	4	3	4	5	Yes	Mildly pleasurable		4	4	2	4	2	3	3	4	3	4	3	4	3	4	3	4	3	3	3	3	3	2	4	4	2
Yes	Male		35	No	Yes	Yes	Relax, with tingles	One	2-3 times a month	Yes	Usually, but not always, a quiet environment, with no music playing, no traffic noise.	Whispering			4	3	6	4	3	6	0	Yes	Quite pleasurable		5	5	5	5	3	4	5	4	4	4	4	4	2	3	3	5	5	5	5	4	4	4	4	4	2
Yes	Male		33	No	Yes	No				Yes	1. Calamity 2. Right or certain person. Just happens in relation to very specific people. 3. Had a shot of ASMR after working physically and listening to music. Drank red Bull beforehand. So, it happens not only when I am calm. I used to watch ASMR vids before and I stopped about 4 or 5 years ago.	Personal attention			3	6	5	5	0	0	0	Yes	Quite pleasurable		4	3	3	1	5	1	4	4	5	1	1	4	1	1	1	5	2	2	2	1	3	1	1	5	1
Yes	Female		20	Yes	No																				2	2	2	2	1	2	1	1	1	1	1	4	1	1	1	1	1	4	1	2	1	1	3	2	1
Yes	Female		28	No	Yes	Yes	All three - in order to experience tingles, in order to relax and in order to fall asleep.	1-3	Daily	Yes	I need to be "tuned in" in order to achieve ASMR sensations. I need to not be busy doing other stuff, and I need to have the time and expect to get tingles in order for it to work best. Also, I need headphones in order to get tingles.	Paying attention to detail, concentrating on something, slowly performing mundane actions or explaining something			4	6	3	5	4	6	0	Yes	Quite pleasurable		5	3	4	5	3	5	5	3	4	4	3	3	3	4	2	2	4	4	5	5	4	5	5	2	3
Yes	Female		34	No	Yes	No				Yes	Small quiet room	Paying attention to detail, concentrating on something, slowly performing mundane actions or explaining something			0	4	5	5	0	6	0	Yes	Mildly pleasurable		1	4	4	3	1	5	3	4	2	1	1	2	1	1	1	2	3	5	4	3	2	2	3	4	3
Yes	Male		25	No	No																				1	2	4	3	1	5	3	1	1	1	1	5	1	2	2	2	1	4	3	5	1	3	5	1	1
Yes	Male		25	No	Yes	Yes	Just to get the feeling.	Two or three.	2-3 times a month	Yes	I need to be alone.	Paying attention to detail, concentrating on something, slowly performing mundane actions or explaining something			4	5	4	2	3	5	3	Yes	Quite pleasurable		3	4	2	2	1	2	4	2	2	1	2	3	2	4	2	1	2	4	1	4	1	2	2	2	2
Yes	Female		24	No	Yes	Yes	I watch it to experience tingles, relax, calm down my anxiety, and to fall asleep.	2	Daily	No		Personal attention			6	5	3	4	6	3	1	Yes	Mildly pleasurable		2	3	2	1	1	4	1	1	2	1	2	2	4	1	4	1	2	1	1	2	2	1	4	2	1
Yes	Female		64	No	Yes	Yes	I don't view the videos but I do convert them to audio and listen to them on my ipod. I use them for all of the things you mention-tingles, relaxing and help falling asleep. Viewing them takes me out of the moment.	I listen to 1 at a time.	2-3 times a week	No		Other	There are certain sounds that are hard to describe. One is a certain sound of the tongue making a sound on the roof of the mouth or certain sounds the lips can sometimes make when someone is speaking. Only certain people make these sounds.		1	1	3	0	0	1	0	Yes	Quite pleasurable		4	3	1	1	1	2	1	2	1	1	1	2	1	2	3	1	2	2	3	3	1	1	4	1	1
Yes	Male		20	No	No																				1	3	2	2	1	4	4	1	1	3	2	4	4	3	4	3	3	4	2	3	2	2	2	4	4
Yes	Female		31	No	Yes	Yes	Tingles and to become sleepy	4	2-3 times a month	Yes	Quiet environment, calmness	Whispering			0	4	6	4	4	4	4	Yes	Mildly pleasurable		3	5	4	2	2	3	5	2	2	2	3	4	3	5	4	3	5	5	5	4	3	2	5	5	5
Yes	Female		18	No	Yes	Yes	To experience tingles and to relax me before I sleep.	1-5	Daily	Yes	Very very quiet (when watching videos, not in real life), not too warm, no harsh lighting or other harsh stimuli	Other	It wouldn't let me select these individually, but tapping, personal attention, attention to detail, roleplays, whispering/soft voices, repetition (of actions or words), hand movements, reiki		0	6	5	3	0	6	0	Yes	Quite pleasurable		4	5	5	2	3	1	5	1	1	1	1	1	2	1	2	1	1	5	3	3	4	3	3	1	1
Yes	Female		23	Yes	No																				5	5	1	5	1	2	5	4	1	5	1	2	1	5	5	1	5	5	5	5	1	5	5	5	2
Yes	Female		21	Yes	No																				5	5	5	4	5	4	5	3	3	3	4	5	5	4	5	5	4	5	5	5	5	5	4	5	4
Yes	Female		22	Yes	No																				4	5	2	2	2	4	3	1	1	1	1	5	2	3	4	3	3	1	4	4	1	1	1	2	2
Yes	Female		29	No	Yes	No				Yes	Quiet room, slow movements	Whispering			3	3	5	4	6	4	0	Yes	Mildly pleasurable		3	4	4	4	2	2	4	2	1	1	2	3	3	1	4	2	3	3	3	4	3	3	3	4	1
Yes	Male		21	Yes	No																				1	3	5	3	5	2	3	1	4	4	4	5	4	3	5	5	1	1	1	2	5	5	2	3	5
Yes	Female		20	Yes	No																				4	2	4	3	2	3	5	2	1	1	3	4	1	2	4	3	3	4	2	4	1	3	5	1	1
Yes	Female		20	Yes	No																				2	2	3	3	2	2	2	2	2	2	2	3	2	1	1	1	1	2	2	2	1	1	2	1	1
Yes	Female		19	No	Yes	Yes	Sometimes it helps me relaxed. The ASMR sensation is also a new experience that can feel a bit ovrewhelming but also very pleasing	2	Less than once a month	No		Whispering			4	0	6	1	3	0	0	No	Mildly pleasurable		5	5	5	5	5	2	2	1	4	1	1	5	2	5	5	5	5	5	2	5	5	5	5	5	5
Yes	Female		23	Yes	No																				3	2	4	2	2	3	4	2	1	1	2	4	2	3	3	2	3	3	3	4	3	4	3	1	4
Yes	Female		55	No	Yes	Yes	Sometimes to experience the tingles, but mostly to relax.	1-2	2-3 times a month	No		Crisp sounds (tapping/crinkling)			4	6	4	1	6	0	0	Yes	Mildly pleasurable		4	5	2	3	1	4	4	3	2	3	3	3	4	5	4	2	5	4	3	4	2	4	4	4	5
Yes	Female		26	No	Yes	Yes	I watch ASMR videos for a number of reasons - Sometimes to help anxiety or to fall asleep. Other times purely for the tingles but what I use ASMR for most is concentration, I play it in the background whilst I go about my work and it actually helps me to stay focused as I struggle with my attention span. There are different types of ASMR videos that I watch for each of these purposes that I use A…	Anywhere from five to 20. (auto play on youtube)	Daily	No		Crisp sounds (tapping/crinkling)			6	3	4	3	3	3	4	Yes	Quite pleasurable		5	5	5	5	5	3	5	4	4	3	4	2	5	5	5	5	4	5	5	4	5	5	5	5	5
Yes	Female		19	Yes	Yes	Yes	it is relaxing and satisfying	7	2-3 times a week	No		Paying attention to detail, concentrating on something, slowly performing mundane actions or explaining something			5	4	0	2	5	5	0	No	Quite pleasurable		4	4	4	4	2	4	4	3	2	1	4	3	4	3	4	4	1	2	4	4	2	4	5	3	3
Yes	Male		27	No	Yes	Yes	Tingles and relaxation, headache relief.	10	2-3 times a week	No		Other	Only lets me select one. In order from above: yes, yes, no, yes, no, yes, no		5	6	0	4	1	5	0	Yes	Quite pleasurable		3	5	4	4	5	2	5	2	1	3	2	2	5	4	5	4	1	5	4	5	5	4	5	4	5
Yes	Female		23	No	Yes	Yes	relaxing, to fall asleep	2	Daily	Yes	quiet, softer sounds to relax	Role-plays (eg. visit to the hairdressers, spa, doctors)			2	3	4	6	2	6	0	Yes	Mildly pleasurable		2	1	3	3	3	5	3	1	1	3	1	4	3	1	4	5	5	4	1	2	1	3	5	5	1
Yes	Female		21	Yes	Yes	No				Yes	Quite room	Hair brushing			0	2	3	3	6	0	0	No	Mildly pleasurable		3	4	4	3	1	4	4	3	1	3	2	3	1	3	4	2	3	2	4	3	3	2	3	4	2
Yes	Female		30	No	Yes	No				No		Whispering			3	3	6	0	5	0	0	No	Quite pleasurable		5	5	3	5	2	5	5	3	1	1	3	5	1	5	5	5	1	1	5	5	1	5	5	5	1
Yes	Female		61	No	Yes	Yes	Relaxation and to induce sleep	1 or 2	Daily	Yes	Quiet room and correct stimuli	Hair brushing			0	4	3	5	6	6	0	Yes	Quite pleasurable		4	5	5	4	3	4	5	5	4	3	3	5	4	4	5	5	4	5	5	4	4	4	4	4	3
Yes	Female		19	Yes	No																				1	2	2	2	1	3	1	2	2	1	1	3	1	4	1	1	2	4	3	2	2	1	3	2	1
Yes	Male		31	No	Yes	Yes	To experience tingles, to fall asleep	3	2-3 times a week	Yes	Silent room, no distractions	Personal attention			2	6	4	4	1	6	0	Yes	Quite pleasurable		3	4	3	2	4	4	4	1	2	3	4	4	4	2	2	1	3	4	2	4	3	4	2	3	1
Yes	Female		21	Yes	No																				2	2	2	2	2	3	2	2	2	2	2	4	2	2	2	2	2	3	3	3	2	2	3	4	4
Yes	Male		19	No	Yes	No				Yes	When I'm happy	Whispering			0	5	5	0	2	3	0	Yes	Mildly pleasurable		3	5	4	2	3	2	5	2	4	3	5	3	3	4	4	1	2	3	5	4	1	4	4	5	5
Yes	Male		21	Yes	Yes	Yes	relax	2	Less than once a month	No		Paying attention to detail, concentrating on something, slowly performing mundane actions or explaining something			1	1	0	5	3	5	0	Yes	Quite pleasurable		2	3	3	4	3	4	4	3	2	1	2	3	3	4	3	2	3	2	3	2	3	3	3	5	4
Yes	Female		20	No	No																				3	2	1	4	2	2	2	2	1	2	3	1	2	2	2	2	3	4	3	3	4	5	3	1	1
Yes	Female		25	No	Yes	Yes	To relax and fall asleep. They also help me to calm down sometimes when my anxiety gets bad.	any from 1-20 simply just trying to find the right video.	Daily	No		Role-plays (eg. visit to the hairdressers, spa, doctors)			3	4	2	6	6	4	0	Yes	Mildly pleasurable		4	3	5	3	3	4	5	4	2	2	2	4	1	3	2	3	4	5	5	5	4	5	5	4	4
Yes	Female		29	Yes	Yes	No				No		Personal attention			1	5	4	0	0	0	0	No	Neutral		1	2	2	1	1	4	2	1	1	1	1	1	1	2	1	1	1	3	1	1	1	1	2	1	1
Yes	Female		21	Yes	Yes	Yes	I watch ASMR videos to de-stress	Approximately 5-10	2-3 times a month	No		People eating			3	4	5	2	1	0	6	Yes	Mildly pleasurable		3	4	5	4	2	4	3	2	4	1	1	2	1	2	2	3	3	3	4	4	3	1	4	1	1
Yes	Male		25	No	Yes	No				No		Other	voluntary feeling not induced by any specific stimuli		1	6	5	3	6	2	0	Yes	Quite pleasurable		3	4	2	3	5	2	3	5	4	1	5	5	4	2	1	5	3	3	2	4	5	4	3	5	3
Yes	Male		33	No	Yes	Yes	Sleep when I am anxious	Autoplay till I fall asleep	Less than once a month	Yes	Quiet, gentle whispering	Whispering			2	4	6	1	1	1	0	Yes	Mildly pleasurable		3	5	3	3	3	3	4	2	5	2	5	4	4	4	4	5	4	4	5	4	3	5	5	4	4
Yes	Female		17	No	Yes	Yes	Relax	1	2-3 times a week	No		Crisp sounds (tapping/crinkling)			6	0	0	0	3	0	0	No	Mildly pleasurable		5	5	5	1	2	3	5	2	1	1	1	4	1	2	3	3	3	5	5	5	2	3	5	4	2
Yes	Female		18	Yes	No																				2	4	3	1	2	4	2	2	2	2	4	5	4	4	4	2	3	2	4	4	2	2	3	2	3
Yes	Female		22	No	Yes	Yes	I watch ASMR for relaxation, fun, and sleep.	About 4-10 idk	2-3 times a week	No		Whispering			4	4	5	5	3	3	1	Yes	Quite pleasurable		3	3	5	1	1	1	5	2	1	1	2	4	1	1	1	2	3	1	1	1	3	2	2	2	2
Yes	Female		20	Yes	Yes	Yes	I have found that ASMR helps me to go sleep, especially if I’m struggling to put my mind to ease	5-10 (depending on the length of film)	2-3 times a week	Yes	Quiet room, in bed, at night	Hair brushing			5	2	4	0	6	1	3	Yes	Mildly pleasurable		3	4	5	4	4	4	4	4	3	4	2	2	3	5	5	5	3	5	5	5	3	4	5	4	2
Yes	Male		28	No	Yes	No				No		Other	Energy. Emotions. Ideas. Knowledge from a Higher Power		3	6	6	3	3	3	3	No	Quite pleasurable		5	5	5	5	4	5	5	5	5	1	4	5	5	5	5	5	5	5	5	5	5	5	5	5	5
Yes	Female		20	No	No																				4	5	4	2	3	4	5	3	4	2	4	4	2	4	4	4	2	4	3	4	1	3	4	4	4
Yes	Female		31	No	Yes	Yes	Experience the tingles	2	2-3 times a month	Yes	I get ASMR much more often from real life scenarios than videos.	Personal attention			1	6	1	1	5	5	0	Yes	Quite pleasurable		5	5	3	5	1	5	2	5	3	1	1	5	1	5	4	4	1	5	2	5	1	3	5	5	3
Yes	Female		32	No	Yes	Yes	Tingles, relaxation, sleep, emotional comfort	2	Less than once a month	Yes	I usually need to have an earbud in my left ear to achieve tingles from audio stimulations. Visual stimulations just need to be reasonably close to my face.	Other	This item needs to be changed to multi-select instead of single select. Whispering, eating, crisp sounds, hand movements close to the camera		5	3	6	1	3	1	6	Yes	Quite pleasurable		4	4	4	4	3	3	5	3	2	2	2	3	2	2	3	4	2	3	4	3	2	3	3	2	1
Yes	Female		23	No	Yes	No				No		Hair brushing			0	0	0	0	3	0	0	No	Neutral		3	1	4	3	2	2	1	1	1	1	1	1	1	1	3	3	4	1	3	4	1	1	3	3	1
Yes	Female		22	No	No																				2	4	1	4	1	4	1	2	1	2	3	3	1	1	3	2	3	4	1	2	3	4	4	2	2
Yes	Female		34	No	Yes	Yes	To relax, help fall asleep, relieve anxiety. Also some of the role plays are fun, entertaining, and can even be educational.	2	Daily	Yes	A quiet, cool room is helpful. The phenomenon, however, can be unpredictable. Sometimes I can do everything "right," and no tingles, and sometimes I am surprised by what triggers the sensation. Recent triggers include: soft voice with pleasing cadence, sorting papers, fingernails tapping.	Role-plays (eg. visit to the hairdressers, spa, doctors)			5	4	4	5	5	2	0	Yes	Quite pleasurable		3	4	5	3	2	3	4	3	3	3	4	5	2	3	5	5	4	4	5	4	4	3	4	5	3
Yes	Male		21	No	Yes	Yes	It was out of curiosity at first, now to relax and experience tingles.	1	2-3 times a month	Yes	Quiet room, headset, no specific lighting.	Crisp sounds (tapping/crinkling)			4	1	3	1	0	0	2	Yes	Mildly pleasurable		5	4	3	4	1	5	4	1	2	1	3	4	1	3	4	4	3	2	4	1	5	2	2	4	3
Yes	Female		20	No	No																				4	3	4	3	3	2	5	2	1	1	2	5	1	1	1	2	2	4	2	2	4	5	4	3	1
Yes	Female		34	No	No																				4	5	5	3	1	2	4	3	1	1	1	4	1	2	2	1	3	4	2	5	1	3	5	3	4
Yes	Female		20	Yes	No																				3	4	4	2	4	3	4	3	2	2	2	4	3	2	2	3	2	2	3	4	2	3	4	3	3
Yes	Female		35	No	Yes	Yes	Bedtime	3	Daily	Yes	Alone, quiet, dark	Role-plays (eg. visit to the hairdressers, spa, doctors)			3	5	4	6	6	4	0	Yes	Mildly pleasurable		3	4	3	3	1	3	1	1	1	1	1	1	1	1	3	3	1	1	2	2	1	1	3	1	1
Yes	Female		20	Yes	Yes	Yes	Help relax and fall asleep	3	2-3 times a week	Yes	Quiet room	Paying attention to detail, concentrating on something, slowly performing mundane actions or explaining something			5	1	2	0	3	3	0	Yes	Mildly pleasurable		3	2	2	4	2	3	1	2	2	2	2	4	3	3	4	2	2	5	3	3	3	2	3	1	1
Yes	Female		21	No	No																				3	5	4	1	1	1	3	1	5	1	1	4	1	1	1	2	3	3	2	3	3	4	4	5	4
Yes	Female		26	Yes	No																				3	4	5	4	4	4	5	4	4	4	4	5	3	4	4	5	3	4	4	5	4	5	4	5	3
Yes	Female		21	Yes	Yes	No				Yes	Quite room with loud ASMR volume	Hair brushing			2	0	1	0	5	0	0	Yes	Quite uncomfortable		2	4	2	5	4	3	2	2	3	1	1	1	2	3	5	3	1	3	1	3	1	1	4	2	1
Yes	Male		21	No	No																				3	2	5	4	3	4	4	2	2	2	2	3	2	4	4	3	3	5	3	4	2	2	4	3	2
Yes	Female		19	Yes	No																				1	3	2	4	1	4	4	1	1	1	1	4	1	3	4	1	1	4	5	4	3	4	4	1	4
Yes	Male		20	No	No																				5	5	5	5	4	5	5	5	4	2	4	5	1	3	4	2	4	4	4	4	3	5	4	3	2
Yes	Female		21	No	Yes	Yes	Tingles and sleep and relaxation	2	2-3 times a week	Yes	Quiet room	Personal attention			1	6	6	6	5	5	0	Yes	Quite pleasurable		5	5	3	5	3	3	3	1	1	4	2	3	4	4	2	2	4	4	3	5	3	4	3	3	4
Yes	Male		22	No	No																				4	4	4	4	1	2	2	1	2	1	2	2	3	2	4	3	2	2	3	3	4	1	2	4	2
Yes	Female		18	No	Yes	Yes	Relax and fall asleep	1-2	2-3 times a week	Yes	Quiet room In my bed	Paying attention to detail, concentrating on something, slowly performing mundane actions or explaining something			1	4	1	2	1	3	0	Yes	Mildly pleasurable		3	1	1	1	2	1	2	1	1	1	1	3	1	2	1	1	2	2	1	4	1	3	2	1	1
Yes	Female		21	No	Yes	Yes	Mostly to fall asleep, but occasionally just for the tingles.	3	Daily	No		Role-plays (eg. visit to the hairdressers, spa, doctors)			5	6	6	6	5	5	1	Yes	Quite pleasurable		4	3	4	2	3	3	5	4	3	1	3	4	2	4	4	2	5	5	4	4	1	5	3	2	2
Yes	Female		22	No	No																				2	2	2	2	1	3	3	2	3	2	3	3	2	3	2	2	2	2	2	3	2	2	2	2	2
Yes	Female		35	No	Yes	Yes	Ideally, for the tingling sensation, though I don't get that as much anymore (mainly because of tolerance but also I don't like a lot of the newer ASMR videos as much as the old ones). I still watch them though, since they're ideal as background viewing/listening. I always listen to when trying to relax or sleep. Sadly, they don't help me fall asleep, but at least I have some pleasant sounds to l…	I'll either put a playlist on loop before I go to bed (so that would be a lot of shorter videos) or, if it's a longer video or a really good video, I'll put that single video on endless repeat. So, it could be anything from 1 video to a long list of short videos. I just make sure that it's on a loop and enough to cover around 6 hours (which is when I set the sleep timer to switch my PC off).	Daily	No		Other	I experience all of the above triggers but the survey only allows the selection of one; i.e., I'd have ticked all the boxes if I could.		5	3	4	4	5	4	4	Yes	Quite pleasurable		4	3	1	3	4	2	4	1	1	2	1	1	1	4	3	1	2	2	3	5	1	3	1	1	2
Yes	Female		19	Yes	Yes	Yes	To help me relax, especially if I'm finding it difficult to fall asleep	2	2-3 times a week	Yes	dark room with no background noise	Whispering			4	5	6	1	3	2	5	Yes	Quite pleasurable		3	3	4	3	4	5	4	2	3	3	2	4	3	4	5	4	3	4	2	3	4	4	4	3	2
Yes	Male		20	Yes	Yes	Yes	Helps me feel relaxed/fall asleep.	1-5	2-3 times a week	No		Other	Can't select more than one: Tapping and whispers.		4	3	5	4	2	2	0	Yes	Mildly pleasurable		3	3	4	2	1	2	4	1	2	1	3	2	1	1	4	1	1	1	2	2	2	4	2	3	1
Yes	Female		22	No	No																				2	5	5	3	2	4	2	2	2	3	3	5	1	4	5	3	4	3	3	3	1	1	4	1	2
Yes	Female		20	Yes	Yes	Yes	Tend to watch them to relax before going to sleep	20	2-3 times a week	No		People eating			0	0	0	0	2	1	6	Yes	Mildly pleasurable		1	1	3	1	2	1	1	2	1	2	2	3	1	2	4	4	4	4	3	5	1	2	3	1	2
Yes	Female		22	No	No																				4	4	4	3	3	3	4	3	1	3	2	4	2	4	4	3	3	4	4	4	3	4	4	2	3
Yes	Female		18	Yes	Yes	Yes	To relax and fall asleep	3-4	2-3 times a month	Yes	Quiet room, comfortable position	People eating			0	1	2	0	1	5	5	Yes	Mildly uncomfortable		5	2	5	1	4	3	5	3	4	1	5	4	1	3	1	1	1	5	5	5	1	5	5	3	5
Yes	Female		20	No	Yes	No				No		Crisp sounds (tapping/crinkling)			6	0	4	0	0	0	0	Yes	Neutral		3	5	1	1	4	5	3	1	4	1	1	4	1	5	5	2	3	5	5	5	1	1	4	1	1
Yes	Other	Beans	21	No	Yes	No				Yes	Only ever experience it when I hear whispers in person, very close to my ear	Whispering			0	0	6	0	0	0	0	No	Quite pleasurable		5	2	5	5	3	2	5	4	5	1	2	5	5	5	2	4	5	5	5	4	2	3	2	2	3
Yes	Female		23	No	Yes	Yes	To help fall asleep better. Tingles are just a bonus.	5	Daily	No		Personal attention			5	6	3	4	1	5	2	Yes	Quite pleasurable		3	3	5	2	4	3	5	3	1	1	3	5	1	3	3	3	3	4	5	3	4	3	5	1	3
Yes	Female		21	Yes	Yes	No				No		Crisp sounds (tapping/crinkling)			2	1	1	0	0	2	0	No	Mildly uncomfortable		3	1	5	2	1	3	5	1	1	1	1	3	1	3	2	1	1	4	3	3	3	1	3	1	1
Yes	Female		21	No	Yes	Yes	To relax, mostly to fall asleep	1 or 2	Daily	No		Personal attention			3	6	5	5	4	4	0	Yes	Quite pleasurable		3	5	5	2	2	2	2	3	1	1	1	1	1	2	2	3	2	3	3	5	5	5	4	2	3
Yes	Female		19	Yes	No																				3	3	4	1	1	4	5	2	3	1	3	1	3	1	2	3	2	1	4	3	2	3	2	1	2
Yes	Female		21	Yes	No																				2	3	4	4	2	3	4	3	2	3	2	3	1	3	1	1	2	4	3	4	3	2	3	1	1
Yes	Male		25	No	No																				4	4	2	5	1	1	5	3	1	1	1	5	3	1	2	4	5	4	2	4	2	5	2	2	1
Yes	Female		23	No	Yes	Yes	I watch ASMR to relax, fall asleep and help lessen my anxiety	5	Daily	Yes	A soft spoken female voice, mostly at night time, quiet and dark room	Crisp sounds (tapping/crinkling)			5	3	1	5	2	6	2	Yes	Quite pleasurable		5	3	4	4	4	3	5	4	5	2	4	5	4	2	3	4	4	4	5	5	5	4	5	5	4
Yes	Female		22	No	Yes	Yes	Usually to help me get to sleep	One	Less than once a month	Yes	Quiet, dark room, directional earphones	Other	Multiple choice didn't work. Whispering and mouth sounds/breathing mainly		1	4	6	0	2	0	5	No	Quite pleasurable		3	1	4	4	5	1	5	1	4	1	4	4	5	1	3	3	1	3	2	1	2	3	2	1	1
Yes	Female		18	Yes	No																				4	4	5	3	2	2	5	1	3	5	4	3	1	1	2	5	5	5	2	5	5	5	5	1	2
Yes	Male		19	No	Yes	Yes	It’s helps me relax when I get anxiety.	2-3. Depends length and quality	2-3 times a week	Yes	I need to be in a dark room, not disturbed.	Other	I get ASMR visually. So staring and slow moving objects, lights shining across my eyes, etc.		3	4	4	1	1	5	4	Yes	Mildly pleasurable		4	4	4	5	4	3	4	4	3	4	3	3	3	5	2	3	4	4	4	4	4	2	5	3	4
Yes	Female		21	No	Yes	Yes	It makes me feel relaxed, and I become almost hypnotized towards those sorts of videos.	3	Daily	No		Paying attention to detail, concentrating on something, slowly performing mundane actions or explaining something			0	1	4	0	2	5	0	Yes	Mildly pleasurable		5	4	5	5	4	3	4	4	3	1	4	5	5	3	3	5	4	4	4	4	3	4	3	3	3
Yes	Male		30	No	Yes	Yes	Experience the tingles	4-5	2-3 times a month	No		Paying attention to detail, concentrating on something, slowly performing mundane actions or explaining something			3	5	1	1	3	5	0	Yes	Quite pleasurable		3	4	1	2	1	3	1	1	1	1	1	2	1	2	2	1	1	3	1	2	1	1	2	1	2
Yes	Female		18	Yes	Yes	Yes	relax	8	Daily	No		People eating			6	1	1	1	1	1	6	Yes	Quite pleasurable		2	2	5	4	4	4	4	4	2	2	2	4	3	2	4	3	3	2	2	2	2	2	2	2	2
Yes	Female		19	Yes	Yes	Yes	To relax and feel the tingles.	3	2-3 times a week	Yes	In bed at night time.	Whispering			3	4	5	4	5	5	5	Yes	Mildly pleasurable		3	3	2	4	3	4	3	4	4	3	3	5	3	1	4	4	4	4	4	3	3	3	4	4	4
Yes	Female		24	No	Yes	Yes	It's mesmerizing.	3	2-3 times a month	No		Paying attention to detail, concentrating on something, slowly performing mundane actions or explaining something			2	5	1	5	0	6	3	Yes	Quite pleasurable		5	2	4	2	4	4	3	3	2	1	2	2	2	4	3	2	4	5	4	2	5	2	5	5	3
Yes	Male		21	Yes	No																				4	4	4	4	5	3	4	2	1	1	1	4	2	4	4	3	2	5	3	4	3	2	3	3	4
Yes	Female		33	No	Yes	Yes	Tingles, relaxation	1	2-3 times a week	No		Whispering			2	6	6	2	2	1	0	Yes	Mildly pleasurable		2	1	5	4	1	4	5	4	1	1	1	4	1	1	4	1	2	5	4	4	3	2	3	1	3
Yes	Male		20	No	No																				5	2	3	4	2	4	3	3	2	2	4	2	1	3	2	3	1	3	4	3	3	3	4	1	1
Yes	Female		18	No	No																				3	5	5	4	4	4	5	2	4	1	4	5	1	4	2	4	1	5	5	4	3	3	4	4	2
Yes	Female		18	No	Yes	No				No		Whispering			5	2	6	2	5	4	5	Yes	Quite uncomfortable		3	5	5	4	3	5	5	1	2	2	4	5	5	5	5	5	3	5	5	5	5	5	5	5	5
Yes	Female		20	No	No																				1	3	4	4	1	3	5	1	2	1	1	4	4	4	3	3	2	4	4	2	3	4	4	4	4
Yes	Female		31	No	Yes	Yes	Tingles, for relaxation, and sometimes to help me sleep	3-4	2-3 times a week	Yes	Quiet room, no distractions.	Crisp sounds (tapping/crinkling)			5	3	5	3	1	2	0	Yes	Mildly pleasurable		2	4	2	2	1	3	4	2	1	1	2	1	1	2	3	1	1	3	2	2	1	2	3	1	1
Yes	Male		20	No	No																				2	3	5	4	3	2	5	3	1	1	2	4	2	2	2	2	1	5	1	4	2	3	1	3	5
Yes	Female		22	No	Yes	Yes	I watch to fall asleep and relax at night.	2-3	Daily	No		Whispering			0	5	6	1	4	2	0	Yes	Mildly pleasurable		5	1	5	3	3	4	5	2	3	1	2	4	2	2	3	2	2	4	4	4	4	5	4	2	2
Yes	Female		52	No	Yes	Yes	To sleep, and to calm down. And of course, I enjoy the tingles!	1	Daily	Yes	I am not quite certain if I require specific conditions. But I think when I experience it naturally (not videos) it is when I am not too agitated. Again, I am not certain, I have not thought about it. Listening to videos I am usually in bed, it is quiet, and it is peaceful in the room.	Crisp sounds (tapping/crinkling)			6	4	6	5	4	1	0	Yes	Quite pleasurable		5	5	5	5	5	5	5	5	4	4	5	5	3	3	5	5	4	4	5	4	4	4	4	4	3
Yes	Female		18	Yes	No																				1	1	3	1	2	3	5	3	1	1	1	4	3	3	2	1	3	3	3	4	2	5	2	1	3
Yes	Female		21	Yes	No																				4	5	3	3	2	1	4	1	1	1	1	3	1	3	2	2	1	2	4	4	2	2	2	1	1
Yes	Female		31	No	Yes	Yes	I watch it to experience tingles because it feels good and makes me feel relaxed. I also watch it to help me fall asleep.	3	Daily	Yes	I need to be in a quiet room by myself. I also noticed that if I am too stressed out or anxious, I will not be able to get tingles.	Crisp sounds (tapping/crinkling)			5	3	5	4	3	3	2	Yes	Quite pleasurable		4	4	5	5	1	3	3	2	1	1	1	4	2	3	1	1	2	1	2	3	2	2	4	4	1
Yes	Female		26	No	Yes	Yes	To help me sleep. Also to help me relax and some times just to tingle for fun but mostly for sleep.	1 to 2	Daily	No		Role-plays (eg. visit to the hairdressers, spa, doctors)			3	5	6	6	6	4	1	Yes	Quite pleasurable		5	2	3	5	3	3	5	3	1	2	2	4	1	4	5	2	4	3	3	5	3	4	5	2	1
Yes	Female		21	Yes	No																				2	4	1	2	1	3	2	2	2	1	1	4	3	3	2	2	4	4	1	3	1	2	3	4	1
Yes	Female		20	No	No																				4	4	4	5	4	2	5	3	4	4	4	5	3	3	4	4	4	5	4	4	3	4	5	3	4
Yes	Female		30	No	Yes	Yes	Reduce anxiety, to feel calm	3-4	2-3 times a month	Yes	I usually must be alone or uninterrupted (if anyone is nearby), my environs need to be quiet/calm. No other noticable stimuli can be present.	Paying attention to detail, concentrating on something, slowly performing mundane actions or explaining something			2	3	2	2	4	5	0	Yes	Mildly pleasurable		1	5	1	2	1	1	5	1	1	1	2	5	1	3	3	2	4	4	5	5	1	3	3	1	1
Yes	Female		20	Yes	Yes	Yes	Relaxing content and fall asleep	3	2-3 times a month	No		Paying attention to detail, concentrating on something, slowly performing mundane actions or explaining something			6	0	5	0	2	4	0	No	Mildly pleasurable		1	4	3	1	1	3	2	1	4	5	3	5	1	4	5	4	5	5	4	4	5	5	5	5	2
Yes	Female		20	Yes	Yes	Yes	To experience the tingles	1-2	Less than once a month	Yes	With headphones and a more quiet room	Other	(It wouldn’t let me select more than one) crisp sounds and whispering		5	1	6	0	2	0	1	Yes	Mildly pleasurable		2	4	5	4	1	3	4	3	2	1	1	5	2	4	3	2	4	4	3	2	5	2	4	2	2
Yes	Male		22	No	No																				1	2	1	1	1	1	1	1	1	1	1	3	2	2	1	2	1	5	1	2	1	3	3	4	4
Yes	Female		23	No	Yes	Yes	Ideally to experience tingles but it’s not often I actually get them from videos. Usually to relax.	2-3	2-3 times a month	Yes	Cold, dark, quiet, with earphones.	Personal attention			3	6	5	5	4	4	0	Yes	Quite pleasurable		4	4	3	1	1	2	5	1	5	1	2	5	1	4	5	1	3	4	3	2	3	1	1	1	1
Yes	Female		20	Yes	No																				3	4	3	2	2	3	4	2	2	2	2	4	2	3	3	3	3	4	3	4	2	2	3	2	2
Yes	Female		19	Yes	No																				3	2	3	2	4	5	3	3	4	4	3	3	2	4	3	3	3	3	4	3	3	3	3	4	4
Yes	Female		18	No	No																				5	2	4	4	2	5	4	1	2	1	4	5	3	4	4	3	1	1	5	4	3	2	4	1	1
Yes	Male		23	No	No																				5	5	4	5	5	5	5	4	3	1	3	5	1	5	5	5	4	5	3	5	3	5	4	1	2
Yes	Female		27	No	Yes	Yes	To relax, unwind, and sleep.	1-2	Daily	Yes	Alone with no interruptions: relaxation time.	Role-plays (eg. visit to the hairdressers, spa, doctors)			0	4	5	6	5	4	0	Yes	Quite pleasurable		5	1	1	1	1	2	5	1	3	1	5	5	1	5	5	2	3	5	5	3	5	5	2	1	5
Yes	Female		19	Yes	Yes	Yes	Relaxes me and relieves stress	1	Less than once a month	No		Paying attention to detail, concentrating on something, slowly performing mundane actions or explaining something			3	1	0	0	0	6	0	No	Mildly pleasurable		1	4	4	1	1	4	3	1	4	1	1	4	1	4	4	1	1	4	4	4	1	4	4	1	1
Yes	Female		24	No	Yes	Yes	To relax, fall asleep, and get tingles.	Depends on the length of the video. If it's a shorter video (under 30 min.), I tend to watch more than one. If it's a longer video (more than 30 min.), I generally only watch one video.	Daily	No		Crisp sounds (tapping/crinkling)			6	4	4	3	4	0	0	Yes	Quite pleasurable		4	5	5	4	5	4	5	4	5	1	5	5	1	2	5	5	5	5	1	5	5	4	5	5	1
Yes	Female		34	No	Yes	Yes	To relax, to calm anxiety, to concentrate on a task, and to fall asleep.	1 or 2	Daily	Yes	In real life either one on one personal attention or one person speaking to a group. For videos I need headphones.	Personal attention			2	6	0	6	1	4	0	Yes	Quite pleasurable		5	2	4	5	5	4	5	1	3	1	4	3	4	5	4	5	5	5	5	5	5	1	5	2	1
Yes	Male		33	No	Yes	Yes	fall asleep & occassional tingles	2	Daily	No		Personal attention			2	5	3	5	2	0	0	Yes	Mildly pleasurable		4	2	5	5	3	4	5	2	2	1	1	4	2	5	4	3	1	4	4	3	5	4	3	2	2
Yes	Female		56	No	Yes	Yes	Tingles, relaxation	1-3	2-3 times a month	Yes	Quiet room, preferably dim lighting. Minimal sensory distractions.	Paying attention to detail, concentrating on something, slowly performing mundane actions or explaining something			4	5	4	3	4	6	0	Yes	Quite pleasurable		5	5	4	5	3	5	4	4	2	5	4	5	3	3	4	5	5	3	5	5	4	5	5	4	5
Yes	Female		20	No	No																				3	1	5	4	1	1	5	1	1	1	1	5	1	1	3	3	1	5	5	5	1	3	3	1	2
Yes	Female		35	No	Yes	Yes	It’s enjoyable and helps to fall asleep	2	2-3 times a week	No		Crisp sounds (tapping/crinkling)			6	5	6	4	3	2	2	Yes	Quite pleasurable		1	4	3	1	1	5	2	1	1	1	1	1	1	1	1	3	3	1	1	3	1	1	2	1	1
Yes	Female		21	Yes	No																				3	1	4	3	2	3	4	2	1	1	1	4	1	3	4	1	2	4	4	3	3	1	4	1	3
Yes	Female		20	Yes	Yes	Yes	To experience tingles, I’m intrigued about the shapes and colours and sounds. It makes me curious and makes me feel relaxed	5	2-3 times a week	No		Hair brushing			2	0	0	0	6	5	0	No	Quite pleasurable		4	5	3	5	2	3	4	5	2	3	5	5	4	5	3	2	4	5	5	4	2	3	5	1	2
Yes	Female		20	Yes	Yes	Yes	I like the sounds, some of them relax me	6	2-3 times a week	Yes	Headphones, can’t get the same effect when it’s played through a speaker	Crisp sounds (tapping/crinkling)			6	2	4	2	3	0	0	Yes	Mildly pleasurable		1	5	5	1	1	5	5	1	4	1	1	4	1	1	5	4	1	5	4	4	1	1	5	1	1
Yes	Female		19	Yes	Yes	Yes	Goosebumps and a sense of relaxation. Transfixion.	3	2-3 times a month	No		Whispering			5	0	5	3	0	4	0	Yes	Mildly pleasurable		5	5	5	4	4	5	5	5	5	5	3	4	4	3	5	3	4	5	4	5	1	4	5	1	5
Yes	Female		19	Yes	No																				4	3	5	3	3	4	4	2	4	2	4	3	2	3	2	2	3	4	4	3	3	3	3	3	2
Yes	Male		22	No	Yes	Yes	Doesn't make me fall asleep, but it puts me in a lightly drowsy/hhypnotic statee I'm better prepared to attempt sleep	3-5	Daily	No		Whispering			4	5	6	5	2	5	0	Yes	Quite pleasurable		2	5	1	2	1	5	5	5	1	2	1	3	4	1	5	4	5	1	1	2	1	5	4	2	1
Yes	Female		20	No	Yes	Yes	It really helps with a lot of aspects of my life. When I feel anxious it calms me down but most importantly I had insomnia and it has completely cured that. I no longer struggle to sleep at all.	2	Daily	No		Crisp sounds (tapping/crinkling)			6	3	5	1	5	5	0	Yes	Mildly pleasurable		3	1	5	4	2	4	4	2	4	1	1	4	2	4	1	2	1	5	2	5	4	1	5	1	2
Yes	Female		37	No	Yes	Yes	To experience the tingles and to make me feel better	3	2-3 times a month	No		People eating			6	1	5	1	0	4	6	Yes	Quite uncomfortable		4	2	2	2	2	5	5	2	2	4	4	4	2	4	4	1	3	5	3	4	1	5	5	3	2
Yes	Female		18	No	Yes	Yes	Fall asleep, tingles ( I feel the tingles as I'm thinking about it )pleasurable	1	Daily	No		Crisp sounds (tapping/crinkling)			6	3	4	2	2	2	5	Yes	Quite pleasurable		4	4	3	4	3	3	3	4	4	2	4	3	3	3	3	3	2	4	4	4	2	2	3	3	4
Yes	Female		20	No	Yes	Yes	To relax and occupy mind, give it something to focus on when trying to sleep.	1	Less than once a month	Yes	Usually listen to it with earphones in, when in bed.	Hair brushing			4	3	3	2	5	2	0	Yes	Mildly pleasurable		3	1	5	4	3	5	5	3	4	2	1	5	5	3	4	4	3	5	4	4	4	5	5	3	2
Yes	Female		19	Yes	Yes	Yes	To fall asleep	3-5	Daily	Yes	Quiet, dimmed lights, little other noise	Personal attention			0	6	6	6	3	6	0	Yes	Quite pleasurable		4	4	5	5	2	3	5	4	3	3	3	5	3	3	5	3	3	5	5	3	4	3	5	3	5
Yes	Female		21	Yes	Yes	Yes	Relaxation	4	2-3 times a month	No		Hair brushing			2	1	4	3	6	4	0	Yes	Mildly pleasurable		4	2	5	4	3	4	5	2	2	3	3	5	4	2	5	2	1	5	2	4	5	5	3	4	5
Yes	Female		35	No	Yes	Yes	Most times I resort to them when feeling stressed and nothing else really helped (meditation, exercise, talking, music, etc). I also turn to it when having difficulty getting to sleep	1-2	2-3 times a month	No		Paying attention to detail, concentrating on something, slowly performing mundane actions or explaining something			5	3	1	2	6	6	3	Yes	Quite pleasurable		5	5	5	5	4	3	5	4	5	5	4	5	1	3	4	4	5	5	3	4	5	5	4	3	4
Yes	Male		23	Yes	Yes	No				Yes	dark lights in a small setting, small rooms in general occasionally with incense	Paying attention to detail, concentrating on something, slowly performing mundane actions or explaining something			0	0	2	1	0	2	0	No	Mildly pleasurable		3	5	1	1	1	3	4	3	3	4	3	5	4	4	4	4	5	3	4	3	4	3	3	4	4
Yes	Female		21	Yes	No																				2	3	5	2	2	3	5	3	2	1	2	5	2	3	3	2	3	2	4	5	3	4	4	2	2
Yes	Female		34	No	Yes	Yes	Relax and falling asleep.	1-2	Daily	Yes	Quiet surroundings, alone.	Personal attention			5	5	4	5	5	5	2	Yes	Quite pleasurable		5	5	5	4	5	4	5	5	5	2	5	5	5	5	5	4	3	3	4	5	5	4	5	5	4
Yes	Female		18	No	Yes	Yes	It is to experience tingles and because the kindness and calmness of ASMRtists makes me feel less stressed	5	Daily	No		Crisp sounds (tapping/crinkling)			5	1	4	1	2	0	3	Yes	Quite pleasurable		2	4	5	2	3	2	5	2	1	1	1	2	1	2	1	1	1	2	2	4	1	1	3	1	2
Yes	Male		20	Yes	Yes	No				No		Crisp sounds (tapping/crinkling)			6	2	4	3	2	1	0	Yes	Neutral		1	2	3	4	5	1	2	3	4	2	3	4	5	3	4	5	2	3	4	5	2	3	4	5	4
Yes	Male		23	Yes	No																				3	4	3	3	3	2	4	1	2	3	2	5	2	1	1	3	4	3	2	4	2	2	1	1	3
Yes	Female		20	No	No																				5	3	1	1	3	3	5	2	5	1	3	4	3	3	3	4	1	5	5	4	5	5	2	5	2
Yes	Female		21	No	No																				3	3	4	4	4	5	4	3	2	3	3	4	1	4	4	3	4	4	4	4	2	2	5	2	4
Yes	Female		28	No	Yes	Yes	To experience tingles and to relax. Not directly to fall asleep (I get to focused to actually do that) but sometimes to relax prior to sleeping to better be able to sleep later. Also sometimes just to enjoy the creativity of the ASMR artists, perticularly on roleplay/story type videos.	1-4	2-3 times a week	Yes	Must be wearing headphones for the sounds/videos... Or be in a safe space with close friends for IRL triggers related to smell, personal care like doing f.eg. hair or makeup, or have someone I'm confortable with stroke my back lightly, f.eg. "draw" patterns for me to guess.	Other	All above expect eating sounds, though attention to detail only in combination with the others... Also water sounds, like water and ice in a bottle, dripping or flowing water etc. And good stories, not nessesarily on a role play way.		6	5	6	6	5	3	0	Yes	Quite pleasurable		3	4	5	5	3	5	5	1	5	1	3	5	5	5	5	5	3	5	4	5	3	4	5	5	5
Yes	Female		20	Yes	No																				4	2	1	2	2	3	5	1	1	1	1	5	1	1	4	1	1	5	1	5	3	5	4	3	3
Yes	Female		30	No	Yes	Yes	To experience the tingling sensation.	2-3	2-3 times a month	Yes	Quiet room, ability to focus peacefully and pay close attention.	Paying attention to detail, concentrating on something, slowly performing mundane actions or explaining something			1	5	1	5	0	6	0	Yes	Quite pleasurable		5	4	3	5	5	4	2	4	4	2	2	3	2	3	2	3	5	5	5	5	3	4	5	4	1
Yes	Male		23	No	Yes	Yes	to get tingles, relax and fall asleep	i watch it nearly 24h/ day, even when i'm asleep	Daily	No		Whispering			4	2	6	2	4	5	6	Yes	Quite pleasurable		5	4	2	4	5	1	5	5	5	5	5	4	4	5	5	4	1	5	5	4	5	5	5	5	5
Yes	Female		24	No	Yes	Yes	Fall asleep	1-3	2-3 times a week	Yes	Quiet room, low lighting	Whispering			5	0	6	0	5	2	4	Yes	Mildly pleasurable		3	4	3	4	1	3	3	5	1	1	1	5	3	5	4	3	4	5	5	5	2	5	4	1	4
Yes	Female		20	Yes	No																				2	2	2	4	3	4	4	2	1	1	1	1	2	3	3	4	4	2	4	3	2	1	3	1	1
Yes	Female		27	No	Yes	Yes	Tingles and relaxation Sleep but also at work when I need to calm down	1 or 2	Daily	No		Whispering			3	4	6	2	1	5	1	Yes	Mildly pleasurable		3	3	4	5	4	3	5	3	2	2	1	3	2	4	4	3	1	5	4	3	2	2	3	2	2
Yes	Female		18	No	No																				2	1	2	1	1	2	1	1	1	1	3	3	1	3	1	1	2	3	4	1	1	1	4	1	1
Yes	Female		24	No	Yes	Yes	To experience tingling, to reduce anxiety and tension	1-3	Daily	No		Other	Crisp sounds, personal attention, role-plays, attention to detail, and foreign accents (survey would not allow multiple choices)		3	6	1	5	4	6	0	Yes	Quite pleasurable		5	4	4	3	2	2	4	3	4	2	1	1	1	5	3	2	3	5	3	4	1	4	3	4	4
Yes	Female		22	Yes	Yes	No				Yes	Quiet	Other	It only allows you to select one, but I experience personal attention and hairbrushing and crisp sounds		4	5	2	2	6	0	0	Yes	Neutral		5	4	5	4	3	4	4	2	5	4	1	5	1	1	5	5	5	5	5	5	1	1	5	5	1
Yes	Male		21	Yes	No																				2	2	1	4	1	2	4	1	2	2	3	4	2	2	3	2	3	2	4	4	2	2	1	3	2
Yes	Female		29	No	Yes	Yes	Mainly to experience the tingles and help me fall asleep. I also think that I am addicted to it now, and I need to watch videos every night.	1, but usually a long one (30-40 min)	Daily	No		Paying attention to detail, concentrating on something, slowly performing mundane actions or explaining something			1	3	4	4	2	6	2	Yes	Quite pleasurable		3	1	4	5	3	2	3	1	1	1	1	3	1	1	4	3	2	4	4	1	2	5	4	4	1
Yes	Female		25	No	Yes	Yes	All of the above. Relax, sleep and tingles.	2-4	Daily	No		Personal attention			4	5	3	4	1	4	0	Yes	Quite pleasurable		3	5	2	2	1	3	3	4	1	3	2	5	3	2	4	3	4	5	3	4	4	1	3	1	5
Yes	Female		20	Yes	No																				4	3	4	4	2	4	5	2	4	2	3	5	2	4	4	2	1	3	4	4	4	5	4	4	2
Yes	Female		21	Yes	No																				3	2	4	1	1	2	1	1	2	1	1	3	1	1	2	1	1	3	3	2	2	3	3	3	2
Yes	Female		19	Yes	No																				2	2	4	4	4	4	2	2	2	1	2	4	4	5	4	4	4	2	2	4	2	4	5	4	4
Yes	Female		19	Yes	No																				2	4	2	4	2	2	2	1	3	1	1	3	4	2	2	3	2	4	4	4	4	3	2	1	1
Yes	Female		19	Yes	No																				1	2	3	2	1	4	2	1	2	2	1	3	1	4	1	1	2	1	1	3	1	4	3	1	1
Yes	Female		21	No	Yes	No				Yes	Quiet rooms	People eating			0	0	1	0	3	1	2	Yes	Neutral		5	2	3	5	1	1	1	3	2	1	2	4	4	5	2	2	3	3	4	2	5	2	2	2	2
Yes	Male		26	No	Yes	No				Yes	I find a quiet area occupied by little to no people helps as I then don't have to worry about anyone noticing as I express the feeling physically (shaking slightly or a small body jolt)	Other	Crisp sounds, whispering (more the feeling of warm breath), hair brushing, attention to deal (it would only allow me to select one)		3	0	5	0	5	5	0	No	Mildly pleasurable		3	4	5	4	5	4	5	4	3	5	3	5	3	4	5	5	5	5	5	4	5	3	4	5	5
Yes	Male		33	No	Yes	Yes	Tingles and relax.	1 to 3	Daily	No		Other	Crisp sounds, Personal attention, Whispering, Role-plays, Hair brushing (your survey only allows me to select 1 option)		4	6	6	6	5	3	3	Yes	Quite pleasurable		4	4	3	2	2	4	4	2	2	3	2	4	3	3	4	3	3	3	1	4	1	4	5	2	3
Yes	Female		20	No	Yes	No				No		Paying attention to detail, concentrating on something, slowly performing mundane actions or explaining something			2	1	5	0	0	3	0	No	Mildly pleasurable		4	5	3	4	3	4	3	3	2	3	1	5	3	2	4	4	4	3	2	4	4	2	4	3	4
Yes	Other	Non-binary	22	Yes	No																				1	5	3	5	4	5	5	3	4	1	5	5	1	4	5	5	5	5	4	5	4	1	5	4	4
Yes	Female		29	No	Yes	Yes	Experience tingles, relax, help me focus on something (while working on said thing)	2	2-3 times a week	No		Whispering			4	6	6	4	3	6	3	Yes	Quite pleasurable		1	1	2	1	1	2	1	3	2	2	1	1	5	1	4	1	1	5	1	4	1	2	2	4	3
Yes	Female		18	Yes	Yes	Yes	Helps me relax in some ways	1-2	Less than once a month	No		People eating			5	0	0	0	0	3	5	Yes	Neutral		2	2	3	5	2	4	5	3	3	4	5	5	1	5	5	1	3	5	5	5	1	3	3	3	3
Yes	Female		20	No	Yes	Yes	To relax/ help study	3	2-3 times a week	Yes	Quiet, dimly lit room	Crisp sounds (tapping/crinkling)			6	1	5	1	1	1	0	Yes	Quite pleasurable		3	4	3	5	4	5	5	3	4	3	4	4	4	3	5	5	5	5	5	4	4	5	5	3	3
Yes	Female		20	No	Yes	Yes	I like the tingling sensation in my spine and sometimes I use them to fall asleep.	Depends on the day, but minimum 2 or 3	Daily	No		Other	It won’t let me select more than one so here’s the ones I experience: personal attention, whispering, role plays, hair brushing, crisp sounds		2	5	5	6	5	1	0	Yes	Quite pleasurable		3	5	4	3	3	3	4	4	3	2	2	4	2	3	4	3	4	4	4	4	4	5	4	3	2
Yes	Male		21	Yes	No																				2	3	5	4	1	2	4	1	2	3	3	5	1	4	2	3	2	5	3	3	2	4	3	2	5
Yes	Male		35	No	Yes	Yes	Experience the tingles.	1	Less than once a month	Yes	Quietness.	Role-plays (eg. visit to the hairdressers, spa, doctors)			2	6	4	5	2	5	1	Yes	Quite pleasurable		5	3	5	5	4	3	3	4	4	3	5	4	3	5	4	5	4	5	3	4	3	4	5	5	4
Yes	Female		21	No	No																				2	4	3	2	1	1	3	1	1	1	2	4	4	4	3	1	2	2	5	3	2	4	1	2	1
Yes	Female		37	No	Yes	Yes	Experience tingles/chills. Relaxes me. Helps me relax and fall asleep	1-2	2-3 times a week	Yes	Quiet, dark, comfortable mostly. Sometimes I experience it when I’m at a store/checking out/ or certain people have this sort of energy that I experience tingles with and it relaxes me too	Whispering			3	2	4	3	3	2	0	Yes	Mildly pleasurable		3	1	2	2	1	1	1	1	1	1	1	2	1	3	3	1	2	1	2	2	2	1	2	1	3
Yes	Female		22	No	Yes	Yes	It makes me feel calm, more relaxed, it gives me tingles	one or two	2-3 times a week	No		Personal attention			3	6	3	4	2	2	0	Yes	Quite pleasurable		5	5	3	5	5	5	5	4	4	2	5	2	5	2	4	5	2	4	3	5	4	3	5	4	3
Yes	Female		21	No	Yes	Yes	I enjoy them	3/4	2-3 times a month	No		Hair brushing			4	0	0	0	4	0	2	Yes	Neutral		2	1	1	3	3	3	2	1	1	1	1	3	1	3	2	1	1	3	1	2	1	2	1	1	1
Yes	Female		21	No	No																				1	3	4	2	1	3	5	1	1	1	2	5	5	3	3	3	3	2	3	4	3	3	4	3	1
Yes	Female		27	Yes	No																				1	5	5	1	1	5	1	5	1	5	1	5	1	1	5	1	1	1	1	1	1	1	1	1	1
Yes	Female		21	No	No																				3	3	4	4	4	4	5	2	2	3	3	5	3	2	2	4	3	5	4	2	4	4	3	4	2
Yes	Male		73	No	No																				4	2	4	2	1	3	3	2	2	2	2	2	1	2	5	3	3	4	4	5	1	5	4	1	1
Yes	Female		20	No	Yes	No				No		Hair brushing			2	0	3	0	5	0	2	Yes	Mildly pleasurable		5	4	5	5	3	4	5	2	1	5	4	3	5	4	5	5	5	5	4	3	3	5	5	3	3
Yes	Female		28	No	Yes	Yes	All 3 of them above.	5-7	2-3 times a week	No		Paying attention to detail, concentrating on something, slowly performing mundane actions or explaining something			4	4	4	5	2	5	4	Yes	Quite pleasurable		4	4	3	3	3	4	5	3	3	1	3	4	3	2	2	3	5	4	4	5	1	4	5	4	3
Yes	Female		22	No	Yes	Yes	Yes	2	Daily	No		Paying attention to detail, concentrating on something, slowly performing mundane actions or explaining something			4	5	5	5	0	6	0	Yes	Quite pleasurable		5	5	5	3	5	5	5	5	3	4	5	5	5	4	3	5	5	5	5	5	5	5	5	5	5
Yes	Female		29	No	Yes	No				Yes	Calm environment, not too bright or loud.	Hair brushing			3	2	3	0	6	5	0	Yes	Quite pleasurable		4	5	4	5	4	5	5	5	5	4	4	5	5	4	5	5	4	5	4	5	5	5	5	5	4
Yes	Female		31	No	Yes	Yes	Tingles and relaxation.	1-2. Usually one long one is enough.	2-3 times a week	Yes	Generally I need to be in a quiet, private space and concentrating on the trigger(s).	Paying attention to detail, concentrating on something, slowly performing mundane actions or explaining something			4	4	3	5	5	6	3	Yes	Quite pleasurable		5	5	4	5	4	4	5	5	2	2	2	4	3	4	4	4	5	5	5	5	5	3	4	4	4
Yes	Other	Non-Binary (transmasculine)	18	No	No																				4	5	5	5	3	5	5	4	3	2	3	5	4	4	3	5	5	5	4	5	4	5	5	3	4
Yes	Male		26	Yes	No																				1	4	3	2	3	5	5	5	4	1	4	4	1	5	5	4	3	1	2	5	5	4	5	2	1
Yes	Female		20	No	Yes	Yes	Relaxes me To fall asleep	5	2-3 times a week	Yes	On my own Comfortable environment e.g. in bed	Crisp sounds (tapping/crinkling)			6	5	5	3	6	2	2	Yes	Quite pleasurable		1	4	1	2	1	1	5	4	3	1	1	5	1	5	5	5	1	5	4	3	3	1	3	4	1
Yes	Female		19	Yes	No																				2	1	3	2	1	2	3	1	1	1	1	2	1	2	1	2	2	1	2	2	1	2	3	1	2
Yes	Female		20	No	No																				1	2	3	2	1	5	5	1	3	1	3	5	3	4	4	4	2	4	3	1	1	4	4	1	2
Yes	Female		27	No	Yes	Yes	To relax or sleep.	1	2-3 times a month	Yes	Not to be under any tipe of susbtance (drugs, alcohol).	Paying attention to detail, concentrating on something, slowly performing mundane actions or explaining something			5	2	2	0	4	6	0	Yes	Quite pleasurable		5	3	5	2	2	5	5	5	1	1	1	3	1	2	4	2	4	4	3	5	1	3	5	5	5
Yes	Female		20	Yes	Yes	Yes	I often use them to wind down before going to bed or to fall asleep if I am struggling to.	2 - 3	2-3 times a week	No		Other	All of the options other than people eating		5	3	4	2	4	3	0	Yes	Mildly pleasurable		4	5	4	3	2	4	4	3	2	2	3	4	4	5	4	4	4	5	4	4	4	2	4	3	2
Yes	Female		19	Yes	Yes	Yes	They relax me as they are satisfying to watch and listen to and they help relieve stress.	7	2-3 times a week	No		Crisp sounds (tapping/crinkling)			6	2	3	6	4	1	0	Yes	Mildly pleasurable		4	2	4	4	3	5	4	4	4	2	4	5	1	5	4	4	5	4	5	4	4	4	5	2	2
Yes	Female		24	No	No																				5	4	3	3	3	4	3	2	2	2	5	3	1	3	2	2	3	4	4	2	3	4	4	2	2
Yes	Female		28	No	Yes	Yes	To sleep.	1	Daily	No		Whispering			4	0	6	0	2	5	0	Yes	Mildly pleasurable		5	5	5	5	5	3	5	5	5	3	4	5	5	5	5	5	5	5	5	5	5	5	5	4	3
Yes	Other	Intersex	20	No	No																				2	4	1	4	2	2	2	2	2	2	2	3	2	2	3	2	2	2	2	4	2	3	3	2	3
Yes	Male		28	No	Yes	Yes	I primarily listen to asmr while falling asleep, but also while I study or write.	I usually do about an hour's worth.	Daily	Yes	quietness is the primary constraint, but any time i feel relaxed, i can achieve asmr.	Other	The question wouldn't allow multiple responses, but my top triggers are things like sand cutting, crinkling, tapping, page turning, head massage, ear eating, and mouth sounds.		6	2	4	2	5	3	0	Yes	Mildly pleasurable		2	3	1	4	1	1	3	1	1	1	1	4	3	5	1	3	2	4	1	2	1	1	4	1	1
Yes	Female		18	Yes	No																				1	1	2	1	1	2	1	2	1	1	1	3	1	1	1	1	1	3	2	1	1	1	1	1	1
Yes	Female		20	No	No																				4	2	2	4	2	2	2	2	2	1	1	4	2	4	2	2	2	2	4	4	2	4	2	4	2
Yes	Female		26	No	Yes	Yes	Both to fall asleep and to experience tingles.	5	Daily	No		Role-plays (eg. visit to the hairdressers, spa, doctors)			6	5	4	6	2	6	0	Yes	Neutral		4	1	3	2	4	3	5	3	4	1	1	2	4	1	4	2	1	5	2	2	1	2	2	3	2
Yes	Female		21	Yes	No																				1	4	4	4	2	5	4	2	1	2	2	4	1	3	5	4	4	4	3	4	5	4	5	3	5
Yes	Male		20	No	Yes	No				Yes	No surrounding sounds	Whispering			2	2	2	2	2	2	2	Yes	Mildly pleasurable		4	5	5	4	2	3	5	3	2	1	4	5	1	2	4	5	2	2	2	4	3	3	5	4	5
Yes	Female		28	No	Yes	No				Yes	I don't remember what exactly I just know it has happened in the past	Whispering			1	4	5	0	0	2	0	No	Mildly pleasurable		4	4	5	5	4	5	5	5	5	1	3	4	4	4	4	4	4	4	3	4	3	5	5	4	4
Yes	Male		20	No	No																				4	4	2	5	2	5	3	1	2	1	3	5	2	4	4	2	2	2	3	4	2	4	4	2	4
Yes	Female		27`	No	Yes	Yes	I generally feel tingling in my back, neck, and behind my ears. It's relaxing and pleasurable. At times it could put me to sleep	5-10 if short, 1 if long	2-3 times a week	No		Whispering			4	4	6	3	4	4	0	Yes	Quite pleasurable		5	5	5	2	3	4	5	5	2	5	3	5	3	2	4	4	5	5	4	5	3	4	5	5	5
Yes	Female		21	Yes	No																				5	4	4	1	2	3	4	3	3	2	3	5	5	5	4	2	4	4	2	5	3	5	5	5	5
Yes	Female		21	No	No																				3	4	2	2	2	4	2	2	2	2	2	4	2	3	4	2	2	3	4	3	2	1	3	1	2
Yes	Female		21	No	Yes	Yes	To relax, and for the tingles!	5-7	2-3 times a week	Yes	Quiet, slightly colder room usually if watching videos, headphones usually mean my tingles are stronger. In real life it can take me by surprise- can sometimes be louder and usually happens when someone is explaining something to me.	Other	Wouldn’t let me tick multiple options. Personal attention,whispering, role-plays, paying attention to detail, people eating, gentle hand movements		0	5	6	5	1	6	4	Yes	Quite pleasurable		2	5	3	4	5	5	5	2	2	3	3	2	1	5	5	4	3	5	1	3	5	2	4	5	1
Yes	Female		24	No	Yes	No				No		Hair brushing			0	5	2	2	6	0	0	No	Quite pleasurable		4	4	3	1	2	3	3	2	3	1	1	4	3	2	3	3	2	5	3	3	4	2	3	2	1
Yes	Male		37	No	No																				3	4	2	2	1	3	3	1	1	1	2	4	1	2	4	2	2	4	3	4	1	2	4	3	4
Yes	Male		18	No	No																				1	3	1	2	1	3	1	1	1	1	1	4	1	2	2	1	3	4	2	3	1	1	1	2	1
Yes	Male		22	No	Yes	Yes	I watch them to help me fall asleep, as well as when I am working/revising as a way to relax and concentrate on what I am doing	4	Daily	Yes	Quiet room, slightly cooler temperature, videos being played through speakers (not headphones/earphones)	Role-plays (eg. visit to the hairdressers, spa, doctors)			0	5	5	6	3	4	0	Yes	Quite pleasurable		4	3	4	2	2	5	3	2	2	3	4	3	3	2	4	3	3	4	4	5	3	4	4	4	5
Yes	Female		28	No	No																				3	5	4	5	4	2	4	2	1	1	2	5	5	5	4	4	2	4	3	5	1	2	4	3	2
Yes	Female		28	No	Yes	Yes	Relax and fall asleep I have depression and anxiety	5	Daily	No		Hair brushing			5	6	6	5	6	2	0	Yes	Quite pleasurable		5	3	5	2	2	1	2	2	2	2	4	5	1	2	5	2	4	5	5	5	2	5	5	4	2
Yes	Other	non-binary	22	Yes	No																				2	4	4	4	1	4	5	2	4	4	1	5	1	2	3	5	5	4	4	4	4	4	5	5	5
Yes	Male		26	No	Yes	Yes	Before sleep, relaxing, while working. I do experience tingles	1 to 2	Daily	No		Personal attention			4	6	6	2	1	1	0	Yes	Quite pleasurable		5	3	1	3	1	3	4	4	2	1	3	3	1	4	5	2	1	5	4	5	5	1	2	2	5
Yes	Male		21	No	Yes	Yes	To relax and fall asleep. Periodically just to experience the tingles while doing a task.	2-3	2-3 times a week	No		Paying attention to detail, concentrating on something, slowly performing mundane actions or explaining something			3	5	5	5	2	6	0	Yes	Quite pleasurable		3	4	2	5	2	4	1	1	1	4	5	4	1	3	1	4	4	4	5	5	1	5	5	1	4
Yes	Female		32	No	Yes	Yes	to induce tingles before bed, but I often listen at work to relax and destress.	to depends if I experience tingles on the first one, if not i'll play several.	Daily	No		Crisp sounds (tapping/crinkling)			6	1	5	3	0	6	0	Yes	Quite pleasurable		5	5	4	5	4	5	5	5	5	1	4	5	5	1	3	4	1	4	5	5	5	1	3	5	1
Yes	Male		37	No	Yes	Yes	sleep	1	2-3 times a month	No		Whispering			2	4	5	3	1	4	0	Yes	Mildly pleasurable		2	3	2	4	3	2	2	1	1	3	2	2	3	4	4	3	2	3	3	4	1	4	4	1	2
Yes	Female		25	No	Yes	Yes	Generally for sleeping, but sometimes to help me calm down	First few minutes of around 5 or 6 till I find the right one	Daily	Yes	Quiet room, laying down	Whispering			2	1	6	2	3	0	6	Yes	Neutral		2	2	3	1	1	3	3	1	1	1	1	1	1	1	1	1	3	3	1	3	2	2	2	1	2
Yes	Female		21	Yes	No																				4	4	4	5	3	5	5	4	2	1	4	5	4	2	4	4	3	5	4	5	4	4	5	5	5
Yes	Female		18	Yes	No																				2	2	4	2	1	3	2	2	1	1	2	3	1	3	2	1	1	1	1	1	1	2	2	2	3
Yes	Female		25	No	No																				4	5	3	1	4	1	1	1	2	1	1	5	5	4	4	3	3	5	4	5	5	4	2	1	1
Yes	Female		19	Yes	No																				4	3	4	1	3	2	5	1	1	2	1	3	1	1	1	2	2	5	4	4	2	2	2	1	1
Yes	Female		33	No	Yes	Yes	To fall asleep, but if not to sleep, to relax and experience tingles.	1.5	2-3 times a week	Yes	Being comfortable and relaxed, and undisturbed. Soft lights/darkness.	Personal attention			2	5	5	2	3	0	0	Yes	Mildly pleasurable		3	5	5	3	4	4	5	5	1	1	1	3	5	3	2	5	3	1	3	4	5	1	3	4	2
Yes	Female		26	No	Yes	Yes	To help sleep, relax and calm anxiety	one video	Daily	Yes	Has to be in a quiet setting, otherwise distractions and other sounds take away from experiencing asmr	Other	Many above(only option to pick one) crisp sounds, whispering, and paying attention to detail etc, hand movements		5	3	4	3	2	5	1	Yes	Quite pleasurable		5	2	4	1	2	3	5	4	3	1	1	2	2	4	5	5	4	2	3	5	1	4	5	5	2
Yes	Female		20	No	No																				3	5	2	4	3	4	4	4	2	4	4	3	4	5	3	5	4	4	4	5	1	5	5	4	4
Yes	Male		33	No	Yes	Yes	I watch ASMR videos to experience the tingles, and to relax. They do not make me fall asleep	Usually 2	Daily	Yes	Absolute quiet, in a dark or dimly lit room. No distractions, usually the temperate is cool	Whispering			3	5	6	5	0	5	0	Yes	Mildly pleasurable		2	1	1	1	1	1	1	1	1	1	1	1	1	1	1	1	1	1	1	1	1	1	1	1	1
Yes	Female		21	Yes	No																				2	3	3	5	4	3	3	2	3	2	4	4	1	4	4	3	2	3	5	4	2	5	5	4	1
Yes	Female		22	No	No																				3	3	2	2	1	3	2	1	1	1	1	2	1	3	4	2	3	2	2	3	2	4	3	2	3
Yes	Male		20	No	No																				4	3	1	3	1	2	1	1	1	1	1	2	1	3	1	2	1	1	1	1	1	1	2	1	1
Yes	Male		18	Yes	No																				2	3	1	2	1	4	3	1	1	2	1	4	1	3	2	1	4	3	2	4	2	4	3	2	4
Yes	Male		20	No	No																				5	3	4	3	2	4	4	2	2	2	3	5	1	2	4	2	2	5	2	4	3	4	3	5	3
Yes	Female		20	Yes	Yes	No				No		Hair brushing			0	3	0	0	5	0	0	No	Mildly uncomfortable		5	5	5	2	1	5	5	4	5	5	1	5	5	5	5	5	5	5	5	5	1	5	5	4	1
[truncated: 36 more columns]
